# Supplementary material
Source: publisher figshare collection journal article supplement (https://acs.figshare.com/ndownloader/files/4706851)

Supporting Information

**Gold-Catalyzed Efficient Preparation of Linear  $\alpha$ -Iodoenone from  
Propargylic acetates**

Meng Yu, Guozhu Zhang, and Liming Zhang\*

Department of Chemistry/216, University of Nevada, Reno  
1664 North Virginia Street, Reno, Nevada 89557

**General.** Ethyl acetate (ACS grade), hexanes (ACS grade) and diethyl ether (ACS grade) were purchased from Fisher Scientific and used without further purification. Anhydrous Acetone (HPLC grade) was purchased from Acros Organics. Anhydrous tetrahydrofuran in Pure-Pac™ from Aldrich was used directly without further purification. N-bromosuccinimide was purchased from Acros Organics. N-Iodosuccinimide was purchased from Alfa Aesar. Commercially available reagents were used without further purification. Reactions were monitored by thin layer chromatography(TLC) using silicycle precoated silica gel plates. Flash column chromatography was performed over silicycle silica gel (230-400 mesh). <sup>1</sup>H NMR and <sup>13</sup>C NMR spectra were recorded on a Varian 500 MHz Unity plus spectrometer and a Varian 400 MHz spectrometer using residue solvent peaks as internal standards. Infrared spectra were recorded with a Perkin Elmer FT-IR spectrum 2000 spectrometer and are reported in reciprocal centimeter (cm<sup>-1</sup>). Mass spectra were recorded with Waters micromass ZQ detector using electron spray method.

#### General procedure A: Preparation of propargylic acetates

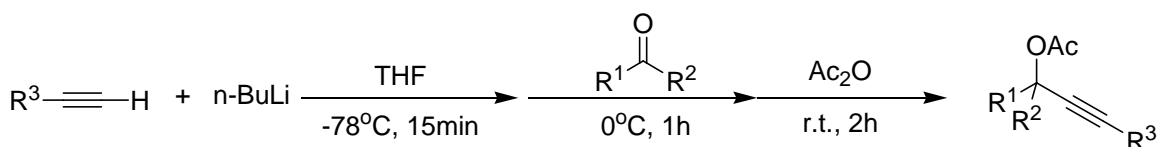

To a solution of alkyne (11 mmol) in anhydrous THF (42 mL) at  $-78^{\circ}C$  under  $N_2$  was added *n*-BuLi (2.5 M solution in hexanes, 4.2 mL, 10.5 mmol). The reaction was stirred at the same temperature for 15 min before the addition of ketone/aldehyde (10 mmol). The resulting mixture was allowed to warm to  $0^{\circ}C$  gradually and stirred for an additional hour. Upon the addition of acetate anhydrous (2.4 mL, 25 mmol), the reaction mixture was warmed to room temperature and stirred for 2 h before quenched with aqueous  $NaHCO_3$ . The mixture was extracted with  $Et_2O$  (3 x 30 mL), and the combined organic phases were washed with water and brine, dried with anhydrous  $MgSO_4$ , and filtered. The filtrate was concentrated, and the residue was purified through silica gel flash column chromatography (hexanes/ethyl acetate = 20/1) to yield the desired acetate.

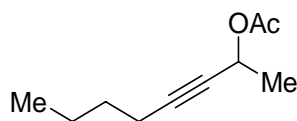

**1**

Compound **1** was prepared in 86% yield according to the general procedure A.  $^1\text{H}$  NMR (400MHz,  $\text{CDCl}_3$ )  $\delta$  5.44 (qt, 1H,  $J = 6.8, 2.0$  Hz), 2.20 (td, 2H,  $J = 7.0, 2.0$  Hz), 2.06 (s, 3H), 1.53 - 1.34 (m, 7H), 0.91 (t, 3H,  $J = 7.2$  Hz);  $^{13}\text{C}$  NMR (100 MHz,  $\text{CDCl}_3$ )  $\delta$  170.0, 85.6, 78.6, 60.9, 30.6, 21.9, 21.8, 21.2, 18.4, 13.6; IR (neat): 2989, 2960, 2937, 2874, 2249, 1744, 1467, 1453, 1371; MS ( $\text{ES}^+$ ) Calculated for  $[\text{C}_{10}\text{H}_{16}\text{NaO}_2]^+$ : 191.1; Found: 191.0.

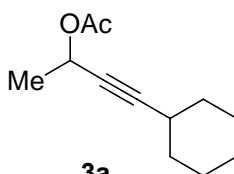

**3a**

Compound **3a** was prepared in 83% yield according to the general procedure A.  $^1\text{H}$  NMR (500MHz,  $\text{CDCl}_3$ )  $\delta$  5.47 (qt, 1H,  $J = 6.5, 2.0$  Hz), 2.40 – 2.36 (m, 1H), 2.07 (s, 3H), 1.79 - 1.67 (m, 4H), 1.50 – 1.39 (m, 7H), 1.32 - 1.27 (m, 2H);  $^{13}\text{C}$  NMR (125 MHz,  $\text{CDCl}_3$ )  $\delta$  170.0, 89.5, 78.5, 60.9, 32.4, 28.9, 25.8, 24.8, 21.9, 21.2; IR (neat): 2988, 2933, 2856, 2244, 1741, 1592, 1450, 1317, 1340, 1309, 1224, 1170, 1592, 1450; MS ( $\text{ES}^+$ ) Calculated for  $[\text{C}_{12}\text{H}_{18}\text{NaO}_2]^+$ : 217.3; Found: 217.2.

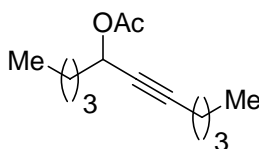

**3b**

Compound **3b** was prepared in 80% yield according to the general procedure A.  $^1\text{H}$  NMR (500MHz,  $\text{CDCl}_3$ )  $\delta$  5.35 (t, 1H,  $J = 6.5$  Hz), 2.21 (td, 2H,  $J = 7.0, 1.7$  Hz), 2.07 (s, 3H), 1.77 - 1.69 (m, 2H), 1.49 (Quintet, 2H,  $J = 7.2$  Hz), 1.43 - 1.31 (m, 6H), 0.93 – 0.89 (m, 6H);  $^{13}\text{C}$  NMR (125 MHz,  $\text{CDCl}_3$ )  $\delta$  170.1, 86.1, 77.6, 64.6, 34.8, 30.6, 27.2, 22.2, 21.9, 21.2, 18.4, 13.9, 13.6; IR (neat): 2959, 2935, 2871, 2864, 2242, 1743, 1468,

1433, 1371, 1351, 1234, 1161, 1108, 1019, 959; MS (ES<sup>+</sup>) Calculated for [C<sub>13</sub>H<sub>22</sub>NaO<sub>2</sub>]<sup>+</sup>: 233.3; Found: 233.3.

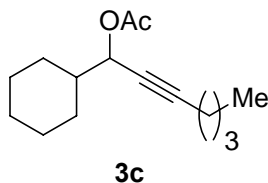

Compound **3c** was prepared in 84% yield according to the general procedure A. <sup>1</sup>H NMR (500MHz, CDCl<sub>3</sub>) δ 5.20 (d, 1H, *J* = 6.0 Hz), 2.21 (t, 2H, *J* = 7.0 Hz), 2.07 (s, 3H), 1.84 - 1.58 (m, 5H), 1.49 (Quintet, 2H, *J* = 7.2 Hz), 1.39 (Sextet, 2H, *J* = 7.2 Hz), 1.27 – 1.03 (m, 6H), 0.90 (t, 3H, *J* = 7.2 Hz); <sup>13</sup>C NMR (125 MHz, CDCl<sub>3</sub>) δ 170.2, 86.8, 76.4, 68.8, 42.0, 30.6, 28.6, 28.0, 26.2, 25.8, 25.7, 21.9, 21.1, 18.4, 13.6; IR (neat): 2960, 2931, 2856, 2239, 1742, 1593, 1452, 1432, 1370, 1231, 1119, 1018, 977; MS (ES<sup>+</sup>) Calculated for [C<sub>15</sub>H<sub>24</sub>NaO<sub>2</sub>]<sup>+</sup>: 259.4; Found: 259.2.

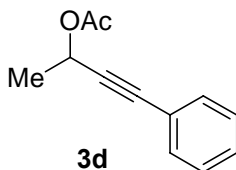

Compound **3d** was prepared in 86% yield according to the general procedure A. <sup>1</sup>H NMR (400 MHz, CDCl<sub>3</sub>) δ 7.45–7.43 (m, 2H), 7.33–7.27 (m, 3H), 5.67 (q, 1H, *J* = 6.6 Hz), 2.11 (s, 3H), 1.58 (d, 3H, *J* = 6.6 Hz); <sup>13</sup>C NMR (100 MHz, CDCl<sub>3</sub>) δ 169.9, 131.8, 128.6, 128.2, 122.2, 87.4, 84.5, 60.8, 21.5, 21.1; IR (neat): 3058, 2990, 2939, 2247, 1743, 1599, 1491, 1444, 1372; MS (ES<sup>+</sup>) Calculated for [C<sub>12</sub>H<sub>12</sub>NaO<sub>2</sub>]<sup>+</sup>: 211.1; Found: 210.9.

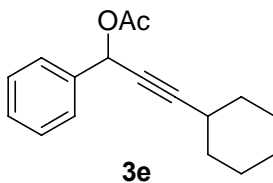

Compound **3e** was prepared in 94% yield according to the general procedure A. <sup>1</sup>H NMR (400 MHz, CDCl<sub>3</sub>) δ 7.55–7.51 (m, 2H), 7.39–7.31 (m, 3H), 6.49 (d, 1H, *J* = 2.0

Hz), 2.49–2.44 (m, 1H), 2.09 (s, 3H), 1.82–1.79 (m, 2H), 1.73–1.66 (m, 2H), 1.54–1.43 (m, 3H), 1.36–1.26 (m, 3H);  $^{13}\text{C}$  NMR (100 MHz,  $\text{CDCl}_3$ )  $\delta$  169.9, 137.8, 128.7, 128.5, 127.7, 92.3, 76.6, 66.0, 32.37, 32.35, 29.1, 25.8, 24.8, 21.2; IR (neat): 3090, 3066, 3035, 2932, 2855, 2236, 1742, 1604, 1588, 1495, 1450, 1369; MS ( $\text{ES}^+$ ) Calculated for  $[\text{C}_{17}\text{H}_{20}\text{NaO}_2]^+$ : 279.1; Found: 279.1.

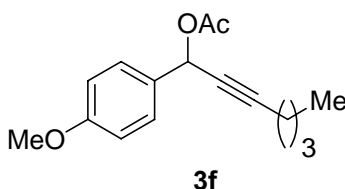

Compound **3f** was prepared in 87% yield according to the general procedure A.  $^1\text{H}$  NMR (500MHz,  $\text{CDCl}_3$ )  $\delta$  7.46 (d, 2H,  $J$  = 8.5 Hz), 6.89 (d, 2H,  $J$  = 8.5 Hz), 6.42 (s, 1H), 3.81 (s, 3H), 2.27 (t, 2H,  $J$  = 7.0 Hz), 2.07 (s, 3H), 1.52 (Quintet, 2H,  $J$  = 7.2 Hz), 1.41 (Sextet, 2H,  $J$  = 7.2 Hz), 0.91 (t, 3H,  $J$  = 7.2 Hz);  $^{13}\text{C}$  NMR (125 MHz,  $\text{CDCl}_3$ )  $\delta$  170.0, 159.9, 129.9, 129.3, 113.8, 88.1, 76.8, 65.8, 55.3, 30.5, 21.9, 21.2, 18.5, 13.6; IR (neat): 3072, 3037, 3003, 2959, 2935, 2873, 2838, 2292, 2234, 1741, 1611, 1587, 1514, 1465, 1443, 1428, 1369, 1343, 1305, 1279, 1251, 1229, 1175, 1144, 1110, 1034, 1015, 952, 909, 832; MS ( $\text{ES}^+$ ) Calculated for  $[\text{C}_{16}\text{H}_{20}\text{NaO}_3]^+$ : 283.3; Found: 283.2.

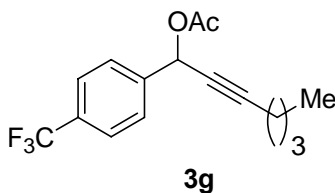

Compound **3g** was prepared in 85% yield according to the general procedure A.  $^1\text{H}$  NMR (400MHz,  $\text{CDCl}_3$ )  $\delta$  7.63 (s, 1H), 6.48 (t, 1H,  $J$  = 2.0 Hz), 2.27 (td, 2H,  $J$  = 7.2, 2.4 Hz), 2.11 (s, 3H), 1.52 (Quintet, 2H,  $J$  = 7.2Hz), 1.40 (Sextet, 2H,  $J$  = 7.2 Hz), 0.91 (t, 3H,  $J$  = 7.2 Hz);  $^{13}\text{C}$  NMR (100 MHz,  $\text{CDCl}_3$ )  $\delta$  169.7, 141.5, 130.8 (q,  $J_{\text{C-F}}$  = 32 Hz), 127.9, 125.6 (q,  $J_{\text{C-F}}$  = 3.7 Hz), 123.9 (q,  $J_{\text{C-F}}$  = 270.0 Hz), 89.2, 76.0, 65.3, 30.4, 21.9, 21.0, 18.5, 13.5; IR (neat): 3067, 2962, 2935, 2876, 2295, 2236, 1928, 1746, 1622, 1590, 1468, 1422, 1371, 1327, 1227, 1168, 1129, 1109, 1068, 1018, 959, 922, 850, 836; MS ( $\text{ES}^+$ ) Calculated for  $[\text{C}_{16}\text{H}_{17}\text{NaO}_2]^+$ : 321.3; Found: 321.2.

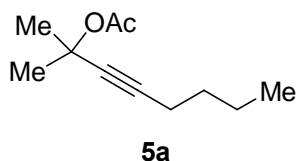

Compound **5a** was prepared in 74% yield according to the general procedure C.  $^1\text{H}$  NMR (500MHz,  $\text{CDCl}_3$ )  $\delta$  2.20 (t, 2H,  $J = 7.0$ ), 2.01 (s, 3H), 1.64 (s, 6H), 1.48 (p, 2H,  $J = 7.6$  Hz), 1.39 (sextet, 2H,  $J = 7.6$  Hz), 0.90 (t, 3H,  $J = 7.6$ );  $^{13}\text{C}$  NMR (125 MHz,  $\text{CDCl}_3$ )  $\delta$  169.4, 84.6, 81.3, 72.6, 30.6, 29.3, 22.1, 21.9, 18.4, 13.6; IR (neat): 2987, 2960, 2936, 2875, 2245, 1747, 1586, 1468, 1434, 1368, 1329, 1266, 1245, 1196, 1016, 953, 822; MS ( $\text{ES}^+$ ) Calculated for  $[\text{C}_{11}\text{H}_{18}\text{NaO}_2]^+$ : 205.1; Found: 205.1.

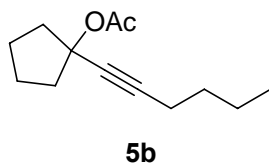

Compound **5b** was prepared in 70% yield according to the general procedure C.  $^1\text{H}$  NMR (400 MHz,  $\text{CDCl}_3$ )  $\delta$  2.22–2.15 (m, 4H), 2.12–2.04 (m, 2H), 2.02 (s, 3H), 1.74–1.70 (m, 4H), 1.50–1.44 (m, 2H), 1.43–1.35 (m, 2H), 0.90 (t, 3H,  $J = 7.6$  Hz);  $^{13}\text{C}$  NMR (100 MHz,  $\text{CDCl}_3$ )  $\delta$  169.7, 85.3, 81.0, 80.5, 40.5, 30.7, 23.2, 21.9, 18.5, 13.6; IR (neat): 2960, 2933, 2875, 2246, 1746, 1593, 1453, 1435, 1367, 1334, 1241, 1124, 1016, 970; MS ( $\text{ES}^+$ ) Calculated for  $[\text{C}_{13}\text{H}_{20}\text{NaO}_2]^+$ : 231.1; Found: 231.1.

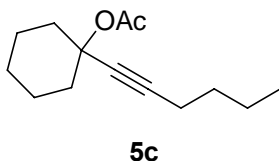

Compound **5c** was prepared in 84% yield according to the general procedure C.  $^1\text{H}$  NMR (400 MHz,  $\text{CDCl}_3$ )  $\delta$  2.254 (t, 2H,  $J = 7.2$  Hz), 2.11–2.06 (m, 2H), 2.03 (s, 3H), 1.84–1.77 (m, 2H), 1.63–1.29 (m, 10H), 0.91 (t, 3H,  $J = 7.2$  Hz);  $^{13}\text{C}$  NMR (100 MHz,  $\text{CDCl}_3$ )  $\delta$  169.3, 86.8, 80.0, 76.1, 37.4, 30.8, 25.3, 22.7, 22.1, 21.9, 18.5, 13.6; IR (neat): 2936, 2861, 2244, 1746, 1600, 1447, 1431, 1367, 1301, 1264, 1230, 1184, 1131, 1034, 1020, 965; MS ( $\text{ES}^+$ ) Calculated for  $[\text{C}_{14}\text{H}_{22}\text{NaO}_2]^+$ : 245.2; Found: 245.1.

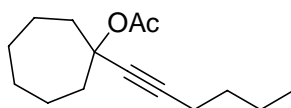

**5d**

Compound **5d** was prepared in 70% yield according to the general procedure C.  $^1\text{H}$  NMR (400 MHz,  $\text{CDCl}_3$ )  $\delta$  2.24–2.17 (m, 4H), 2.06–2.04 (m, 2H), 2.01 (s, 3H), 1.57–1.37 (m, 12H), 0.90 (t, 3H,  $J = 7.2$  Hz);  $^{13}\text{C}$  NMR (100 MHz,  $\text{CDCl}_3$ )  $\delta$  169.4, 86.0, 81, 2, 79.5, 40.5, 30.7, 28.2, 22.2, 21.9, 18.5, 13.6; IR (neat): 2936, 2861, 2244, 1746, 1600, 1447, 1431, 1367, 1301, 1264, 1230, 1184, 1131, 1034, 1020, 965; MS ( $\text{ES}^+$ ) Calculated for  $[\text{C}_{15}\text{H}_{24}\text{NaO}_2]^+$ : 257.2; Found: 259.2.

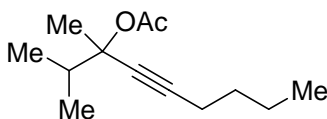

**5e**

Compound **5e** was prepared in 80% yield according to the general procedure C.  $^1\text{H}$  NMR (400 MHz,  $\text{CDCl}_3$ )  $\delta$  2.23 (t, 2H,  $J = 7.2$  Hz), 2.16 (heptet, 1H,  $J = 6.6$  Hz), 2.01 (s, 3H), 1.61 (s, 3H), 1.53–1.43 (m, 2H), 1.42–1.37 (m, 2H), 1.01 (d, 3H,  $J = 6.6$  Hz), 0.97 (d, 3H,  $J = 6.6$  Hz), 0.90 (t, 3H,  $J = 7.2$  Hz);  $^{13}\text{C}$  NMR (100 MHz,  $\text{CDCl}_3$ )  $\delta$  169.4, 86.2, 79.6, 79.2, 37.4, 30.8, 23.5, 22.1, 21.9, 18.4, 17.5, 17.2, 13.6; IR (neat): 2965, 2936, 2876, 2244, 1746, 1559, 1458, 1436, 1371, 1336, 1243, 1129, 1060, 1014, 942; MS ( $\text{ES}^+$ ) Calculated for  $[\text{C}_{13}\text{H}_{22}\text{NaO}_2]^+$ : 233.2; Found: 233.2.

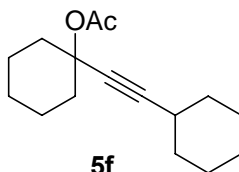

**5f**

Compound **5f** was prepared in 91% yield according to the general procedure A.  $^1\text{H}$  NMR (400 MHz,  $\text{CDCl}_3$ )  $\delta$  2.47–2.43 (m, 1H), 2.13–2.08 (m, 2H), 2.02 (s, 3H), 1.82–1.24 (m, 18H);  $^{13}\text{C}$  NMR (100 MHz,  $\text{CDCl}_3$ )  $\delta$  169.2, 91.0, 80.2, 76.2, 37.5, 32.6, 28.9, 26.0, 25.3, 24.6, 22.9, 22.2; IR (neat): 2933, 2857, 2663, 2237, 1746, 1615, 1447, 1367, 1229, 1184, 1022; MS ( $\text{ES}^+$ ) Calculated for  $[\text{C}_{16}\text{H}_{24}\text{NaO}_2]^+$ : 271.2; Found: 271.1.

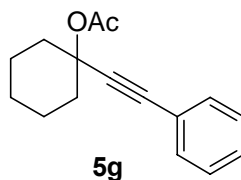

Compound **5g** was prepared in 88% yield according to the general procedure A.  $^1\text{H}$  NMR (500 MHz,  $\text{CDCl}_3$ )  $\delta$  7.46 -7.44 (m, 2H), 7.29 -7.28 (m, 3H), 2.24 -2.19 (m, 2H), 2.07 (s, 3H), 1.93 -1.88 (m, 2H), 1.70 -1.65 (m, 4H), 1.59 - 1.53 (m, 1H), 1.39 -1.33 (m, 1H);  $^{13}\text{C}$  NMR (125 MHz,  $\text{CDCl}_3$ )  $\delta$  169.2, 131.8, 128.2, 128.1, 122.8, 89.1, 86.2, 75.9, 37.1, 25.2, 22.7, 22.0; IR (neat): 3082, 3057, 3035, 3023, 2937, 2861, 2667, 2229, 2203, 1743, 1675, 1599, 1573, 1491, 1444, 1367, 1346, 1312, 1264, 1229, 1163, 1138, 1071, 1041, 1022, 959; MS ( $\text{ES}^+$ ) Calculated for  $[\text{C}_{16}\text{H}_{18}\text{NaO}_2]^+$ : 265.3; Found: 265.2.

### Preparation propargylic acetate **3h**

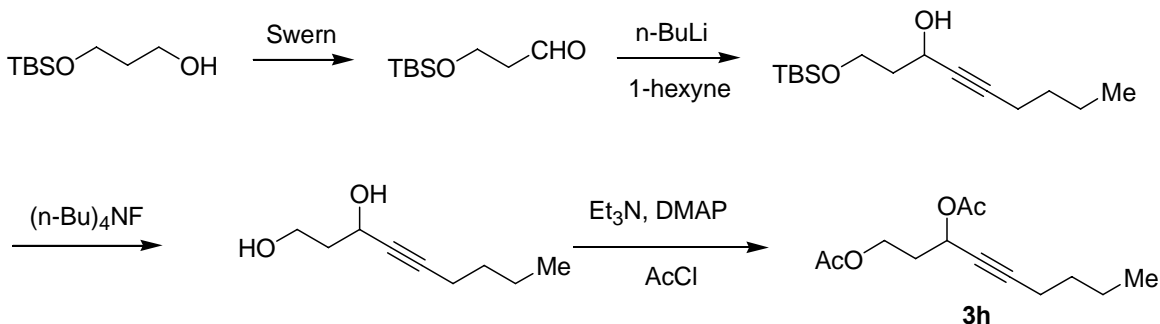

A solution oxalyl chloride (1.9 g, 10 mmol) in DCM (110 mL) was cooled in a dry ice-acetone bath under nitrogen. To the solution was added dropwise anhydrous DMSO (1.6 mL, 22 mmol). After the addition, the reaction was kept at  $-78^\circ\text{C}$  for half an hour. A solution of mono-TBS protected propane-1,3-diol (1.9 g, 10 mmol) in DCM (20 mL) was added dropwise, and the reaction mixture was stirred at  $-78^\circ\text{C}$  for 1 hour. The reaction was quenched by addition of  $\text{Et}_3\text{N}$  (6.9 mL, 50 mmol). The reaction was allowed to warm to room temperature. The organic layer was successively washed with saturated  $\text{NH}_4\text{Cl}$  (100 mL) and brine (100 mL). the resulting organic layer was dried upon anhydrous  $\text{MgSO}_4$ , filtered, concentrated in vacuo to give the crude aldehyde (2.3 g) which could be used in the next step without further purification.

A solution of 1-hexyne (1.30 g, 15.8 mmol) in THF (50 ml) was cooled to  $-78^\circ\text{C}$  in a dry ice-acetone bath under nitrogen, and n-BuLi (1.6M in Hexane, 9.17 mL, 14.64



mmol) was added dropwise in 15 mins. After the addition, a solution of the crude aldehyde (2.3 g, 12.2 mmol) in THF (10 mL) was added dropwise, the resulting reaction mixture was allowed to warm to room temperature gradually. The reaction was quenched by addition of saturated  $\text{NH}_4\text{Cl}$  (30 mL). The aqueous layer was extracted with  $\text{Et}_2\text{O}$  (3 x 50 mL). The combined organic layer was washed with brine (100 mL), dried with  $\text{MgSO}_4$ , filtered, and concentrated to give an oil. The desired alcohol was purified by bulb-to-bulb distillation as a clear liquid (1.4 g, 50% yield two steps)

To a solution of the above alcohol (270 mg, 1 mmol) in THF (5 mL) was added TBAF (1M in THF, 1 mL). The resulting mixture was stirred at room temperature for 2 hours. The reaction was cooled down in an ice-water bath, and  $\text{Et}_3\text{N}$  (0.3 mL, 3 mmol) and DMAP (cat) were added followed by dropwise addition of  $\text{CH}_3\text{COCl}$  (0.18 mL, 2.5 mmol). The resulting mixture was allowed to rise to room temperature and stir for 4 hours. The reaction was quenched by addition of water (20 mL). The organic layer was extracted with  $\text{Et}_2\text{O}$  (3 x 15 mL). The combined organic layer was washed with brine (50 mL), dried upon  $\text{MgSO}_4$ , filtered, and concentrated to give an oily residue, which was purified by flash-column to give diacetate **3h** (160 mg, 67% yield).  $^1\text{H}$  NMR (400 MHz,  $\text{CDCl}_3$ )  $\delta$  5.47 (tt, 1H,  $J = 6.8, 2.0$  Hz), 4.25–4.15 (m, 2H), 2.20 (td, 2H,  $J = 6.8, 2.0$  Hz), 2.13–2.03 (m, 8H), 1.51–1.45 (m, 2H), 1.41–1.36 (m, 2H), 0.90 (t, 3H,  $J = 6.8$  Hz);  $^{13}\text{C}$  NMR (125 MHz,  $\text{CDCl}_3$ )  $\delta$  170.9, 170.0, 87.0, 76.5, 61.5, 60.4, 34.1, 30.4, 21.9, 21.0, 20.9, 18.3, 13.5; IR (neat): 2960, 2936, 2874, 2247, 1744, 1592, 1459, 1432, 1370, 1232, 1159, 1045, 960; MS ( $\text{ES}^+$ ) Calculated for  $[\text{C}_{13}\text{H}_{20}\text{NaO}_4]^+$ : 263.1; Found: 263.2.

### Preparation propargylic acetate **3i**

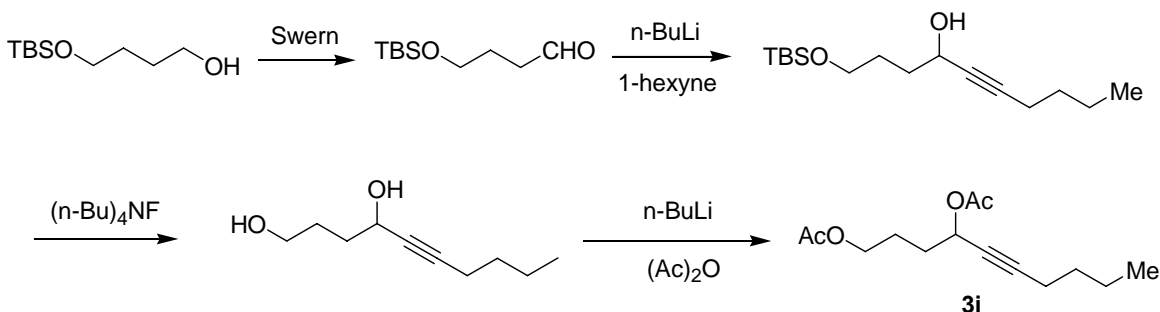

A solution oxalyl chloride (0.4 g, 2 mmol) in DCM (20 mL) was cooled to  $-78^\circ\text{C}$  in a dry ice-acetone bath under nitrogen. To the solution was added dropwise anhydrous DMSO (0.32 mL, 4.4 mmol). After addition, the reaction was kept at  $-78^\circ\text{C}$  for half an

hour. A solution of mono-TBS protected butane-1,4-diol (0.38 g, 2 mmol) in DCM (4 mL) was added dropwise, and the resulting mixture was stirred at -78°C for 1 hour. The reaction was quenched by the addition of Et<sub>3</sub>N (1.38 mL, 10 mmol). The reaction was allowed to warm to room temperature. The organic layer was successively washed with saturated NH<sub>4</sub>Cl (20 mL) and brine (20 mL). The resulting organic layer was dried with anhydrous MgSO<sub>4</sub>, filtered, and concentrated in *vacuo* to give the crude aldehyde, which was used in the next step without further purification.

A solution of 1-hexyne (0.13 g, 0.16 mmol) in THF (10 mL) was cooled to -78°C in a dry ice-acetone bath under nitrogen, and *n*-BuLi (1.6M in Hexane, 1 mL, 1.6 mmol) was added dropwise. The resulting mixture was stirred for 15 mins, and a solution of aldehyde (0.23 g, 1.2 mmol) in THF (10 mL) was added dropwise. Upon the addition, the reaction mixture was allowed to warm to room temperature and stirred for 15 min. The reaction was quenched by the addition of saturated NH<sub>4</sub>Cl (10 mL). The aqueous layer was extracted with Et<sub>2</sub>O (3 x 20 mL). The combined organic layer was washed with brine (50 mL), dried upon MgSO<sub>4</sub>, filtered, and concentrated to give an oily residue, which was purified by flash-column to give the desired alcohol (0.2 g, 35% yield, two steps)

To a solution of the alcohol (90 mg, 0.3 mmol) in THF (5 mL) was added the TBAF (1M in THF, 0.3 mL, 0.3 mmol). The resulting mixture was stirred at room temperature for 2 hours. The reaction cooled down to -78°C in a dry ice-acetone bath under nitrogen, and *n*-BuLi (1.6M in Hexane, 0.37 mL, 0.6 mmol) was added dropwise. Upon the addition, the reaction mixture was stirred for 15 min, and a solution of acetic anhydride (0.12 g, 0.6 mmol) in THF (2 mL) was added dropwise. The reaction was allowed to warm to room temperature and kept stirring for half an hour. The reaction was quenched by addition of saturated NH<sub>4</sub>Cl (10 mL). The aqueous layer was extracted with Et<sub>2</sub>O (3 x 10 mL). The combined organic layer was washed with brine (50 mL), dried upon MgSO<sub>4</sub>, filtered, and concentrated to give an oily residue, which was purified by flash-column to give diacetate **3i** (60 mg, 83% yield two steps). <sup>1</sup>H NMR (400 MHz, CDCl<sub>3</sub>) δ 5.40–5.38 (m, 1H), 4.10 (t, 2H, *J* = 4.8 Hz), 2.21 (t, 2H, *J* = 6.8 Hz), 2.08 (s, 3H), 2.06 (s, 3H), 1.83–1.74 (m, 4H), 1.48 (sextet, 2H, *J* = 8 Hz), 1.39 (sextet, 2H, *J* = 8 Hz), 0.91 (t, 3H, *J* = 7.6 Hz); <sup>13</sup>C NMR (100 MHz, CDCl<sub>3</sub>) δ 171.1, 170.0, 86.7, 64.0, 63.9, 31.7, 30.5, 24.3, 21.9, 21.1, 21.0, 18.4, 13.6; IR (neat): 3308, 2960, 2935, 2337, 1741, 1592, 1430, 1370, 1232, 1023; MS (ES<sup>+</sup>) Calculated for [C<sub>14</sub>H<sub>22</sub>NaO<sub>4</sub>]<sup>+</sup>: 277.1; Found: 277.2.

## General procedure B: Preparation of $\alpha$ -iodoenone **4** and **6**

To a solution of propargylic acetate **3** or **5** (0.2 mmol) in anhydrous acetone (4 mL) cooled in ice-water bath were added H<sub>2</sub>O (0.005 mL, 1.39 eq) and Au(PPh<sub>3</sub>)NTf<sub>2</sub> (0.05 M in acetone, 0.08 mL). The solution was treated with NIS (0.24 mmol, 1.2 eq). The reaction was stirred for two hours before quenched with NEt<sub>3</sub> (1 drop) and aqueous Na<sub>2</sub>S<sub>2</sub>O<sub>3</sub> (5 mL). The mixture was extracted with Et<sub>2</sub>O (3 x 8 mL). The combined organic phases were washed with H<sub>2</sub>O (10 mL) and brine (10 mL), dried with anhydrous MgSO<sub>4</sub>, and filtered. The filtrate was concentrated, and the residue was purified through silica gel flash column chromatography (hexanes/ethyl acetate = 50/1) to yield the desired  $\alpha$ -iodo- $\alpha$ ,  $\beta$ -unsaturated ketones **4** or **6**

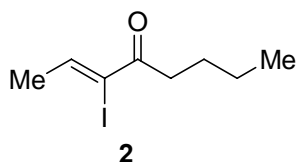

Compound **2** was prepared as a mixture of geometrical isomers ( $Z/E$  = 45/1) in 89% yield according to the general procedure B. <sup>1</sup>H NMR (400 MHz, CDCl<sub>3</sub>) (major isomer)  $\delta$  7.11 (q, 1H,  $J$  = 6.8 Hz), 2.81 (t, 2H,  $J$  = 7.6 Hz), 2.07 (d, 3H,  $J$  = 6.8 Hz), 1.63 (Quintet, 2H,  $J$  = 7.6 Hz), 1.34 (Sextet, 2H,  $J$  = 7.6 Hz), 0.92 (t, 3H,  $J$  = 7.6 Hz); <sup>13</sup>C NMR (125 MHz, CDCl<sub>3</sub>) (major isomer)  $\delta$  194.9, 146.8, 114.3, 37.5, 30.3, 27.1, 23.9, 22.3, 13.8; IR (neat): 2958, 2932, 2871, 1702, 1683, 1611, 1464, 1413, 1373, 1288, 1262, 1238, 1288, 1262, 1238, 1171, 1113, 1072; MS (ES<sup>+</sup>) Calculated for [C<sub>8</sub>H<sub>13</sub>NaIO]<sup>+</sup>: 275.0; Found: 275.0.

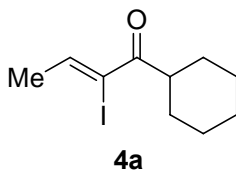

Compound **4a** was isolated as a mixture of geometrical isomers ( $Z/E$  = 12/1) in 82% yield according to the general procedure B. <sup>1</sup>H NMR (500 MHz, CDCl<sub>3</sub>) (major isomer)  $\delta$  7.08 (q, 1H,  $J$  = 7.0 Hz), 3.14 (q, 1H,  $J$  = 7.0 Hz), 2.08 (d, 3H,  $J$  = 7.0 Hz), 1.80-1.78 (m, 4H), 1.48 – 1.22 (m, 6H); <sup>13</sup>C NMR (125 MHz, CDCl<sub>3</sub>) (major isomer)  $\delta$  198.2, 146.1, 113.9, 45.4, 29.9, 25.8, 25.7, 24.0; IR (neat): 3019, 2932, 2855, 2664, 1678, 1611, 1463,

1450, 1372, 1287, 1264, 1241, 1188, 1163, 1131, 1109, 1081, 1071, 1030, 974, 895, 884, 824; MS (ES<sup>+</sup>) Calculated for [C<sub>10</sub>H<sub>15</sub>NaIO]<sup>+</sup>: 301.0; Found: 300.9.

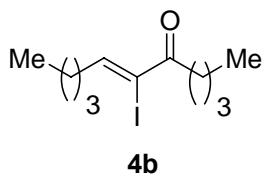

Compound **4b** was prepared as a mixture of geometrical isomers (*Z/E* = 10/1) in 94% yield according to the general procedure B. Compound **4b** (major isomer): <sup>1</sup>H NMR (400 MHz, CDCl<sub>3</sub>) δ 6.99 (t, 1H, *J* = 6.8 Hz), 2.82 (t, 2H, *J* = 7.2 Hz), 2.42 (q, 2H, *J* = 7.6 Hz), 1.67–1.50 (m, 4H), 1.45–1.30 (m, 4H), 0.97–0.89 (m, 6H); <sup>13</sup>C NMR (125 MHz, CDCl<sub>3</sub>) δ 195.0, 151.2, 112.4, 37.7, 37.6, 29.7, 27.1, 22.4, 22.3, 13.8, 13.8; IR (neat): 3351, 2958, 2930, 2872, 2735, 1683, 1604, 1465, 1413, 1379, 1291, 1236, 1167, 1123, 1088, 934; MS (ES<sup>+</sup>) Calculated for [C<sub>11</sub>H<sub>19</sub>INaO]<sup>+</sup>: 317.0; Found: 317.0.

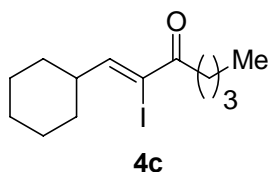

Compound **4c** was prepared as a mixture of geometrical isomers (*Z/E* = 19/1) in 91% yield according to the general procedure B with exceptions that 10 mol % of AgNTf<sub>2</sub> was added together with Au(PPh<sub>3</sub>)NTf<sub>2</sub> and a column basified with Et<sub>3</sub>N was used for purification. Compound **4c** (major isomer): <sup>1</sup>H NMR (500 MHz, CDCl<sub>3</sub>) δ 6.74 (d, 1H, *J* = 9 Hz), 2.80 (t, 2H, *J* = 15 Hz), 2.60–2.52 (m, 1H), 1.82–1.68 (m, 5H), 1.60 (quintet, 2H, *J* = 7.5 Hz), 1.41–1.31 (m, 4H), 1.27–1.20 (m, 3H), 1.92 (t, 3H, *J* = 7.5 Hz); <sup>13</sup>C NMR (125 MHz, CDCl<sub>3</sub>) δ 195.3, 155.7, 109.9, 46.8, 37.6, 30.7, 27.2, 25.7, 25.2, 22.3, 13.8; IR (neat): 3351, 2928, 2852, 2662, 2351, 1683, 1601, 1448, 1278, 1224, 1169, 1128, 1089, 968; MS (ES<sup>+</sup>) Calculated for [C<sub>13</sub>H<sub>21</sub>INaO]<sup>+</sup>: 343.1; Found: 343.0.

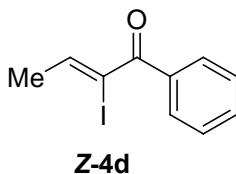

Compound **4d** was prepared in 75% yield in a 1.2:1 Z/E ratio of separable isomers according to the general procedure B. Compound **Z-4d**:  $^1\text{H}$  NMR (400 MHz,  $\text{CDCl}_3$ )  $\delta$  7.69 (d, 2H,  $J = 8$  Hz), 7.55 (t, 2H,  $J = 8$  Hz), 7.44 (t, 2H,  $J = 8$  Hz), 6.73 (q, 1H,  $J = 8$  Hz), 2.09 (d, 3H,  $J = 8$  Hz);  $^{13}\text{C}$  NMR (125 MHz,  $\text{CDCl}_3$ )  $\delta$  191.9, 149.7, 135.8, 132.4, 129.6, 128.4, 110.5, 23.6; IR (neat): 3297, 3059, 2924, 2851, 2356, 1993, 1658, 1606, 1577, 1446, 1371, 1314, 1260, 1179, 1120, 1060, 1025, 965  $\text{MS (ES}^+)$  Calculated for  $[\text{C}_{10}\text{H}_9\text{INaO}]^+$ : 295.0; Found: 295.0.

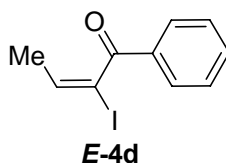

Compound **E-4d**:  $^1\text{H}$  NMR (400 MHz,  $\text{CDCl}_3$ )  $\delta$  7.98 (d, 2H,  $J = 8$  Hz), 7.61 (t, 2H,  $J = 8$  Hz), 7.49 (t, 2H,  $J = 8$  Hz), 6.67 (q, 1H,  $J = 8$  Hz), 1.67 (d, 3H,  $J = 8$  Hz);  $^{13}\text{C}$  NMR (125 MHz,  $\text{CDCl}_3$ )  $\delta$  192.7, 140.8, 134.0, 133.6, 129.9, 128.9, 90.4, 18.7; IR (neat): 3053, 2916, 2850, 2347, 1666, 1596, 1448, 1329, 1227, 1174, 1115, 1012;  $\text{MS (ES}^+)$  Calculated for  $[\text{C}_{10}\text{H}_9\text{INaO}]^+$ : 295.0; Found: 295.0.

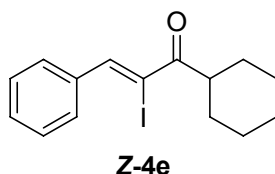

Compound **4e** was prepared in 97% yield in a 1:2 Z/E ratio of separable isomers according to the general procedure B. Compound **Z-4e**:  $^1\text{H}$  NMR (500 MHz,  $\text{CDCl}_3$ )  $\delta$  7.96 (s, 1H), 7.75–7.70 (m, 2H), 7.46–7.43 (m, 3H), 3.33 (tt, 1H,  $J = 11.5, 3$  Hz), 1.92–1.83 (m, 4H), 1.74–1.72 (m, 1H), 1.54–1.46 (m, 2H), 1.42–1.23 (m, 3H);  $^{13}\text{C}$  NMR (125 MHz,  $\text{CDCl}_3$ )  $\delta$  199.5, 145.6, 135.9, 130.0, 129.5, 128.3, 107.2, 45.6, 30.0, 25.8; IR (neat): 3334, 3057, 3023, 2930, 2853, 2662, 1674, 1591, 1491, 1445, 1366, 1262, 1186, 1150, 1112, 1013, 925;  $\text{MS (ES}^+)$  Calculated for  $[\text{C}_{15}\text{H}_{17}\text{INaO}]^+$ : 363.0; Found: 362.9.

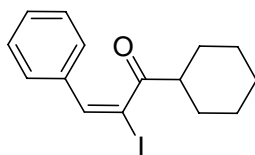

**E-4e**

Compound **E-4e**:  $^1\text{H}$  NMR (500 MHz,  $\text{CDCl}_3$ )  $\delta$  7.46 (s, 1H), 7.32–7.31 (m, 3H), 7.19–7.17 (m, 2H), 2.47 (tt, 1H,  $J = 11$ , 3.5 Hz), 1.82 (d, 2H,  $J = 11.5$  Hz), 1.68–1.54 (m, 2H), 1.58–1.54 (m, 1H), 1.39–1.32 (m, 2H), 1.16–1.02 (m, 3H);  $^{13}\text{C}$  NMR (125 MHz,  $\text{CDCl}_3$ )  $\delta$  206.3, 143.0, 136.7, 129.0, 129.6, 128.1, 96.3, 49.5, 29.5, 25.6, 25.6; IR (neat): 3352, 3057, 3024, 2930, 2853, 2662, 1687, 1598, 1572, 1494, 1448, 1366, 1312, 1289, 1236, 1141, 1071, 1007, 926, 814; MS ( $\text{ES}^+$ ) Calculated for  $[\text{C}_{15}\text{H}_{17}\text{INaO}]^+$ : 363.0; Found: 362.9.

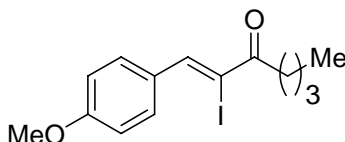

**Z-4f**

Compound **4f** was prepared in 84% yield in a 1.05:1 Z/E ratio of separable isomers according to the general procedure B. Compound **Z-4f**:  $^1\text{H}$  NMR (400 MHz,  $\text{CDCl}_3$ )  $\delta$  8.02 (s, 1H), 7.90 (d, 2H,  $J = 8.8$  Hz), 6.98 (d, 2H,  $J = 8.8$  Hz), 3.87 (s, 3H), 2.97 (t, 2H,  $J = 8$  Hz), 1.70 (quintet, 2H,  $J = 7.2$  Hz), 1.39 (sextet, 2H,  $J = 7.6$  Hz), 0.95 (t, 3H,  $J = 7.2$  Hz);  $^{13}\text{C}$  NMR (125 MHz,  $\text{CDCl}_3$ )  $\delta$  195.9, 161.4, 146.1, 132.0, 127.6, 113.8, 104.6, 55.4, 37.8, 27.4, 22.4, 13.9; IR (neat): 3003, 2957, 2932, 2871, 2838, 1674, 1604, 1587, 1568, 1509, 1463, 1255, 1148, 1029, 826; MS ( $\text{ES}^+$ ) Calculated for  $[\text{C}_{14}\text{H}_{17}\text{INaO}_2]^+$ : 367.0; Found: 366.9.

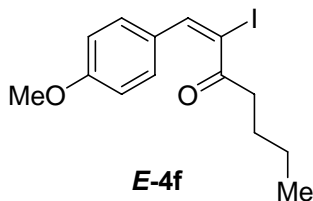

**E-4f**

Compound **E-4f**:  $^1\text{H}$  NMR (400 MHz,  $\text{CDCl}_3$ )  $\delta$  7.36 (s, 1H), 7.13 (d, 2H,  $J = 8.8$  Hz), 6.84 (d, 2H,  $J = 8.8$  Hz), 3.81 (s, 3H), 2.54 (t, 2H,  $J = 7.6$  Hz), 1.56 (quintet, 2H,  $J = 7.2$  Hz), 1.24 (sextet, 2H,  $J = 7.6$  Hz), 0.83 (t, 3H,  $J = 7.2$  Hz);  $^{13}\text{C}$  NMR (125 MHz,  $\text{CDCl}_3$ )  $\delta$

203.9, 160.2, 142.6, 129.7, 129.2, 114.0, 94.7, 55.3, 40.2, 26.4, 22.1, 13.7; IR (neat): 3271, 2957, 2930, 2870, 1685, 1604, 1509, 1456, 1293, 1255, 1178, 1122, 1032; MS (ES<sup>+</sup>) Calculated for [C<sub>14</sub>H<sub>17</sub>IO<sub>2</sub>]<sup>+</sup>: 267.0; Found: 267.0.

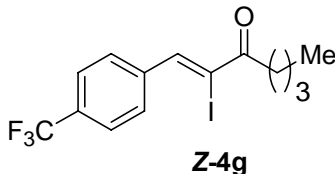

Compound **4g** was prepared in 96% yield in a 5:1 Z/E ratio of separable isomers according to the general procedure B. Compound **Z-4g**: <sup>1</sup>H NMR (400 MHz, CDCl<sub>3</sub>) δ 8.00 (s, 1H), 7.81 (d, 2H, *J* = 8.4 Hz), 7.70 (d, 2H, *J* = 8.4 Hz), 2.99 (t, 2H, *J* = 7.2 Hz), 1.71 (Quintet, 2H, *J* = 7.2 Hz), 1.40 (Sextet, 2H, *J* = 7.2 Hz), 0.96 (t, 3H, *J* = 7.2 Hz); <sup>13</sup>C NMR (125 MHz, CDCl<sub>3</sub>) δ 196.2, 144.8, 139.8, 131.6 (q, *J*<sub>C-F</sub> = 32.4 Hz), 129.8, 125.6 (q, *J*<sub>C-F</sub> = 3.72 Hz), 124.0 (q, *J*<sub>C-F</sub> = 270.8 Hz), 110.2, 38.4, 27.3, 22.5, 14.1; IR (neat): 3070, 2960, 2934, 2874, 1681, 1598, 1466, 1412, 1324, 1168, 1128, 1068, 1017, 885, 827; MS (ES<sup>+</sup>) Calculated for [C<sub>14</sub>H<sub>14</sub>NaF<sub>3</sub>IO]<sup>+</sup>: 405.0; Found: 404.9.

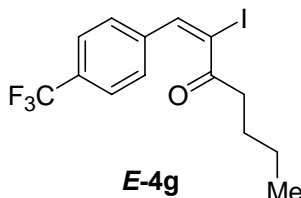

Compound **E-4g**: <sup>1</sup>H NMR (400 MHz, CDCl<sub>3</sub>) δ 7.58 (d, 2H, *J* = 8.4 Hz), 7.38 (s, 1H), 7.31 (d, 2H, *J* = 8.4 Hz), 2.55 (t, 2H, *J* = 7.2 Hz), 1.56 (Quintet, 2H, *J* = 7.2 Hz), 1.24 (Sextet, 2H, *J* = 7.2 Hz), 0.83 (t, 3H, *J* = 7.2 Hz); <sup>13</sup>C NMR (125 MHz, CDCl<sub>3</sub>) δ 203.0, 140.7, 139.5, 130.7 (q, *J*<sub>C-F</sub> = 32.4 Hz), 128.2, 125.7 (q, *J*<sub>C-F</sub> = 3.75 Hz), 123.8 (q, *J*<sub>C-F</sub> = 270.6 Hz), 99.68, 40.0, 26.0, 22.0, 13.7; IR (neat): 3070, 2960, 2923, 2870, 1699, 1597, 1459, 1421, 1324, 1168, 1126, 1068, 1017, 874, 830; MS (ES<sup>+</sup>) Calculated for [C<sub>14</sub>H<sub>14</sub>NaF<sub>3</sub>IO]<sup>+</sup>: 405.0; Found: 404.9.

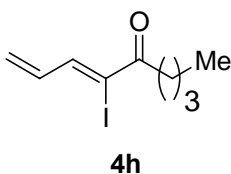

Compound **4h** was prepared in 80% yield according to the general procedure B.  $^1\text{H}$  NMR (500 MHz,  $\text{CDCl}_3$ )  $\delta$  7.37 (d, 1H,  $J = 10$  Hz), 6.78 (td, 1H,  $J = 16.5, 10$  Hz), 5.88 (d, 1H,  $J = 17$  Hz), 5.76 (d, 1H,  $J = 10$  Hz), 2.87 (t, 2H,  $J = 7.5$  Hz), 1.65 (Quintet, 2H,  $J = 7.5$  Hz), 1.36 (sextet, 2H,  $J = 7.5$  Hz), 0.93 (t, 3H,  $J = 7.5$  Hz);  $^{13}\text{C}$  NMR (125 MHz,  $\text{CDCl}_3$ )  $\delta$  195.4, 146.2, 139.3, 128.9, 110.6, 37.7, 27.1, 22.3, 13.9; IR (neat): 3274, 2958, 2331, 1682, 1597, 1456, 1597, 1457, 1261, 1123, 1042. MS ( $\text{ES}^+$ ) Calculated for  $[\text{C}_9\text{H}_{13}\text{INaO}]^+$ : 286.9; Found: 286.6.

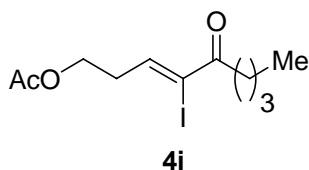

Compound **4i** was prepared in 83% yield according to the general procedure B.  $^1\text{H}$  NMR (400 MHz,  $\text{CDCl}_3$ )  $\delta$  7.00 (t, 1H,  $J = 6.8$  Hz), 4.13 (t, 2H,  $J = 6.4$  Hz), 2.82 (t, 2H,  $J = 7.2$  Hz), 2.50 (q, 2H,  $J = 7.2$  Hz), 2.07 (s, 3H), 1.90 (quintet, 2H,  $J = 7.2$  Hz), 1.63 (quintet, 2H,  $J = 7.6$  Hz), 1.35 (sextet, 2H,  $J = 7.6$  Hz), 0.93 (t, 3H,  $J = 6.8$  Hz);  $^{13}\text{C}$  NMR (125 MHz,  $\text{CDCl}_3$ )  $\delta$  194.9, 171.0, 149.8, 113.0, 63.5, 37.7, 34.6, 27.1, 26.7, 22.3, 21.0, 13.8; IR (neat): 3271, 2958, 2872, 1738, 1683, 1604, 1456, 1366, 1241, 1159, 1118, 1044; MS ( $\text{ES}^+$ ) Calculated for  $[\text{C}_{12}\text{H}_{19}\text{INaO}_3]^+$ : 361.0; Found: 360.9.

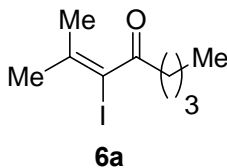

Compound **6a** was prepared in 96% yield according to the general procedure B.  $^1\text{H}$  NMR (400 MHz,  $\text{CDCl}_3$ )  $\delta$  2.81 (t, 2H,  $J = 7.2$  Hz), 2.03 (s, 3H), 1.96 (s, 3H), 1.61 (Quintet, 2H,  $J = 7.2$  Hz), 1.35 (Sextet, 2H,  $J = 7.2$  Hz), 0.93 (t, 3H,  $J = 7.2$  Hz);  $^{13}\text{C}$  NMR (125 MHz,  $\text{CDCl}_3$ )  $\delta$  202.3, 144.3, 95.5, 40.5, 30.3, 26.4, 22.3, 21.9, 13.8; IR (neat): 2958, 2932, 2873, 1688, 1601, 1464, 1441, 1406, 1380, 1368, 1258, 1238, 1155, 1105, 1044, 910, 842; MS ( $\text{ES}^+$ ) Calculated for  $[\text{C}_9\text{H}_{15}\text{NaIO}]^+$ : 289.0; Found: 289.0.



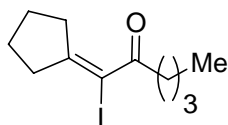

**6b**

Compound **6b** was prepared in 87% yield according to the general procedure B.  $^1\text{H}$  NMR (400 MHz,  $\text{CDCl}_3$ )  $\delta$  2.85 (t, 2H,  $J = 7.2$  Hz), 2.70 (tt, 2H,  $J = 7.2$ , 1.2 Hz), 2.47 (tt, 2H,  $J = 7.2$ , 1.2 Hz), 1.89 (Quintet, 2H,  $J = 7.2$  Hz), 1.72 (Quintet, 2H,  $J = 7.2$  Hz), 1.58 (Quintet, 2H,  $J = 7.2$  Hz), 1.34 (Sextet, 2H,  $J = 7.2$  Hz), 0.92 (t, 3H,  $J = 7.2$  Hz);  $^{13}\text{C}$  NMR (125 MHz,  $\text{CDCl}_3$ )  $\delta$  198.9, 166.4, 92.3, 44.4, 41.8, 36.1, 28.7, 26.9, 24.9, 22.3, 13.9; IR (neat): 2959, 2936, 2872, 1674, 1573, 1466, 1452, 1413, 1379, 1306, 1289, 1264, 1172, 1158, 1137, 1088, 911; MS ( $\text{ES}^+$ ) Calculated for  $[\text{C}_{11}\text{H}_{17}\text{NaIO}]^+$ : 315.0; Found: 315.0.

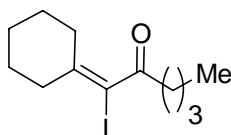

**6c**

Compound **6c** was prepared in 91% yield according to the general procedure B.  $^1\text{H}$  NMR (400 MHz,  $\text{CDCl}_3$ )  $\delta$  2.79 (t, 2H,  $J = 7.2$  Hz), 2.41 (t, 2H,  $J = 5.6$  Hz), 2.33 (t, 2H,  $J = 5.6$  Hz), 1.66 – 1.50 (m, 8H), 1.35 (Sextet, 2H,  $J = 7.2$  Hz), 0.93 (t, 3H,  $J = 7.2$  Hz);  $^{13}\text{C}$  NMR (125 MHz,  $\text{CDCl}_3$ )  $\delta$  202.5, 149.2, 92.4, 40.3, 39.6, 32.9, 28.0, 27.4, 26.3, 25.9, 22.3, 13.8; IR (neat): 2957, 2932, 2857, 1694, 1606, 1464, 1448, 1404, 1350, 1260, 1221, 1145, 1077, 1069, 984, 854; MS ( $\text{ES}^+$ ) Calculated for  $[\text{C}_{12}\text{H}_{19}\text{NaIO}]^+$ : 329.0; Found: 329.0.

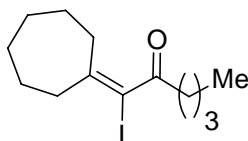

**6d**

Compound **6d** was prepared in 99% yield according to the general procedure B.  $^1\text{H}$  NMR (400 MHz,  $\text{CDCl}_3$ )  $\delta$  2.80 (t, 2H,  $J = 7.2$  Hz), 2.47 – 2.42 (m, 4H), 1.69 – 1.49 (m, 10H), 1.35 (Sextet, 2H,  $J = 7.2$  Hz), 0.93 (t, 3H,  $J = 7.2$  Hz);  $^{13}\text{C}$  NMR (125 MHz,  $\text{CDCl}_3$ )  $\delta$  202.4, 151.4, 96.1, 41.5, 40.4, 33.5, 29.2, 28.5, 28.0, 26.4, 26.1, 22.3, 13.8; IR (neat): 2956, 2927, 2857, 1688, 1599, 1464, 1457, 1404, 1351, 1266, 1160, 1132, 1081, 957, 909; MS ( $\text{ES}^+$ ) Calculated for  $[\text{C}_{13}\text{H}_{21}\text{NaIO}]^+$ : 343.0; Found: 343.0.

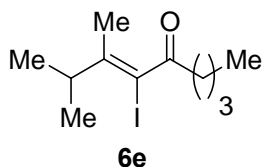

Compound **6e** was isolated as a mixture of geometrical isomers ( $Z/E = 1/2.31$ ) in 88% yield according to the general procedure B.  $^1\text{H}$  NMR (500 MHz,  $\text{CDCl}_3$ ) (major isomer)  $\delta$  2.83 (Quintet, 1H,  $J = 7.0$  Hz), 2.79 (t, 2H,  $J = 7.5$  Hz), 1.88 (s, 3H), 1.61 (Quintet, 2H,  $J = 7.5$  Hz), 1.35 (Quintet, 2H,  $J = 7.5$  Hz), 1.02 (d, 6H,  $J = 7.0$  Hz), 0.93 (t, 3H,  $J = 7.5$  Hz);  $^1\text{H}$  NMR (500 MHz,  $\text{CDCl}_3$ ) (minor isomer)  $\delta$  2.94 (Quintet, 1H,  $J = 7.0$  Hz), 2.78 (t, 2H,  $J = 7.5$  Hz), 1.77 (s, 3H), 1.61 (Quintet, 2H,  $J = 7.5$  Hz), 1.35 (Quintet, 2H,  $J = 7.5$  Hz), 1.02 (d, 6H,  $J = 7.0$  Hz), 0.93 (t, 3H,  $J = 7.5$  Hz)  $^{13}\text{C}$  NMR (125 MHz,  $\text{CDCl}_3$ ) (major isomer)  $\delta$  202.5, 150.6, 95.9, 40.3, 39.8, 33.5, 26.3, 22.3, 21.0, 19.7, 13.8;  $^{13}\text{C}$  NMR (125 MHz,  $\text{CDCl}_3$ ) (minor isomer)  $\delta$  202.7, 149.5, 93.9, 40.3, 39.8, 33.5, 26.3, 22.3, 21.6, 14.6, 13.8; IR (neat): 2962, 2932, 2872, 1695, 1620, 1615, 1464, 1404, 1385, 1363, 1342, 1225, 1151, 1101, 1062, 983, 900; MS ( $\text{ES}^+$ ) Calculated for  $[\text{C}_{11}\text{H}_{19}\text{NaIO}]^+$ : 317.1; Found: 317.0.

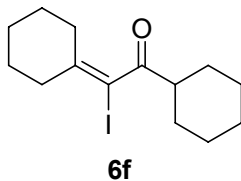

Compound **6f** was prepared in 96% yield according to the general procedure B.  $^1\text{H}$  NMR (500 MHz,  $\text{CDCl}_3$ )  $\delta$  3.03 (tt, 1H,  $J = 11, 3.0$  Hz), 2.42 (t, 2H,  $J = 7.5$  Hz), 2.30 (t, 2H,  $J = 6$  Hz), 1.92 (d, 2H,  $J = 12.5$  Hz), 1.80–1.77 (m, 2H), 1.69–1.50 (m, 7H), 1.41–1.10 (m, 5H);  $^{13}\text{C}$  NMR (125 MHz,  $\text{CDCl}_3$ )  $\delta$  204.9, 149.4, 91.8, 47.5, 39.6, 33.4, 28.8, 28.0, 27.4, 25.9, 25.8, 25.7; IR (neat): 3351, 2930, 2853, 2609, 1684, 1616, 1448, 1350, 1309, 1219, 1149, 1084, 982; MS ( $\text{ES}^+$ ) Calculated for  $[\text{C}_{14}\text{H}_{21}\text{INaO}]^+$ : 355.0; Found: 355.0.

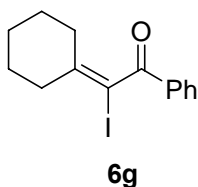

Compound **6g** was prepared in 83% yield according to the general procedure B.  $^1\text{H}$  NMR (400 MHz,  $\text{CDCl}_3$ )  $\delta$  7.98 (d, 2H,  $J = 8$  Hz), 7.50 (t, 1H,  $J = 7.6$  Hz), 7.48 (t, 2H,  $J = 7.6$  Hz), 2.55 (t, 2H,  $J = 6$  Hz), 2.22 (t, 2H,  $J = 6$  Hz), 1.75–1.69 (m, 2H), 1.60–1.54 (m, 2H), 1.47–1.42 (m, 2H);  $^{13}\text{C}$  NMR (125 MHz,  $\text{CDCl}_3$ )  $\delta$  193.1, 149.6, 134.0, 133.7, 130.0, 128.7, 87.7, 38.9, 33.2, 27.5, 27.4, 25.8; IR (neat): 3308, 3061, 2932, 2854, 2668, 2201, 1966, 1908, 1817, 1777, 1664, 1632, 1596, 1579, 1448, 1311, 1221, 1173, 1022, 982, 824; MS ( $\text{ES}^+$ ) Calculated for  $[\text{C}_{14}\text{H}_{15}\text{INaO}]^+$ : 349.0; Found: 349.0.

Automation directory: /home/walkup/vnmr/sys/data/auto\_2007.01.04\_12  
File: exp  
Sample id: tmpstudy

Pulse Sequence: szpul  
Solvent: cdcl3  
Temp: 25.0 C / 298.1 K  
Operator: walkup  
VNMRS-400 "NMR400"

Relax. delay: 1.000 sec  
Pulse: 45.0 degrees  
Acq. time: 2.049 sec  
Width: 6410.3 Hz  
8 repetitions  
OBSERVE H1, 399.7793055 MHz  
DATA PROCESSING  
Line broadening 0.2 Hz  
FT size 65536  
Total time 0 min, 30 sec

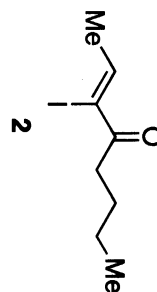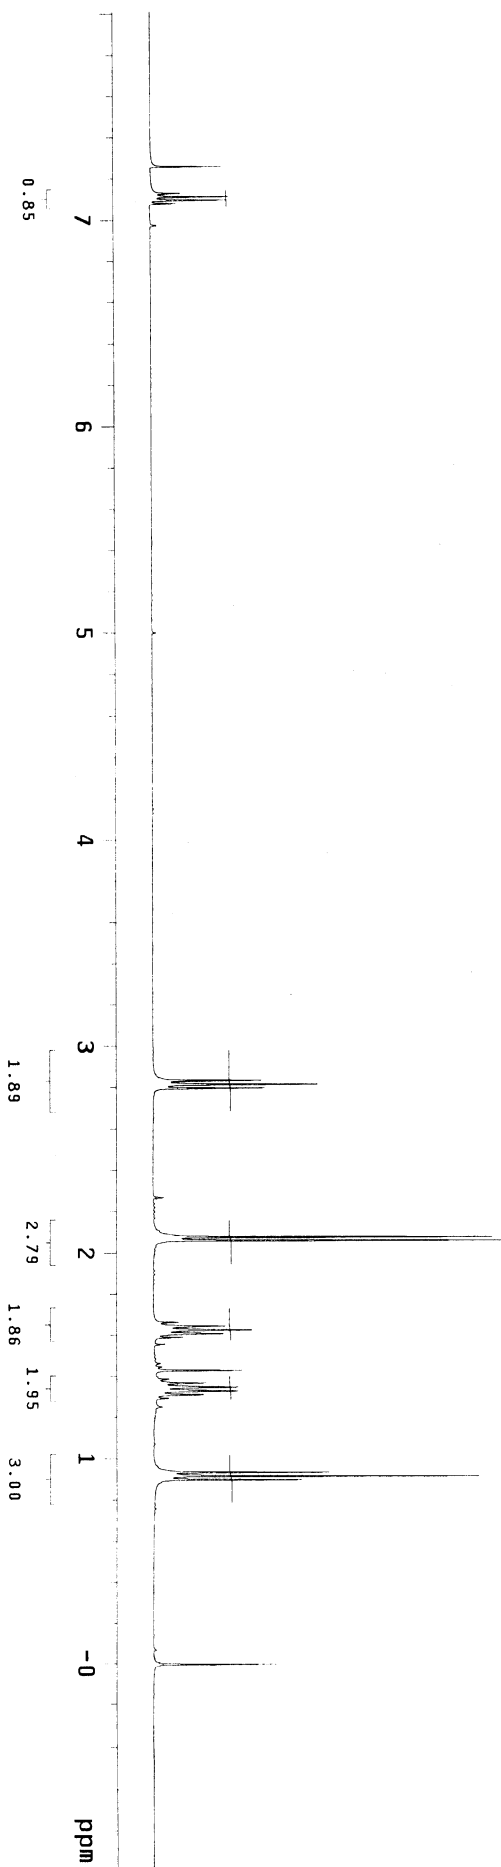

exp1 Carbon

SAMPLE SPECIAL  
date Jan 5 2007 temp 25.0  
solvent cdc13 gain 30  
file /home/walkup/~ not used  
data/Zhang/Meng/1m~ hst 0.008  
ethy\_NIS\_Acetone-P~ pw90 13.000  
ure\_C13.fid alfa 10.000  
ACQUISITION  
sw 30487.8 f1  
at 1.300 n  
np 79298 dp y  
fb 17000 hs nm  
bs 32  
d1 1.000 lb  
nt 15786 fn  
ct 128  
TRANSMITTER  
tn C13 sp -2076.3  
sfrq 125.689 wp 30487.3  
tof 1255.3 rfp 11754.9  
tpwr 56 rfp 9678.1  
pw 6.500 ip -105.0  
DECOUPLER  
dn H1 wc  
dof 0 sc 250  
dm 0 vs 0  
dmm YYY 300000  
dpwr w th 17  
dmf 33 ai cdc ph 11600

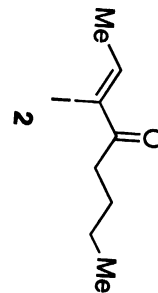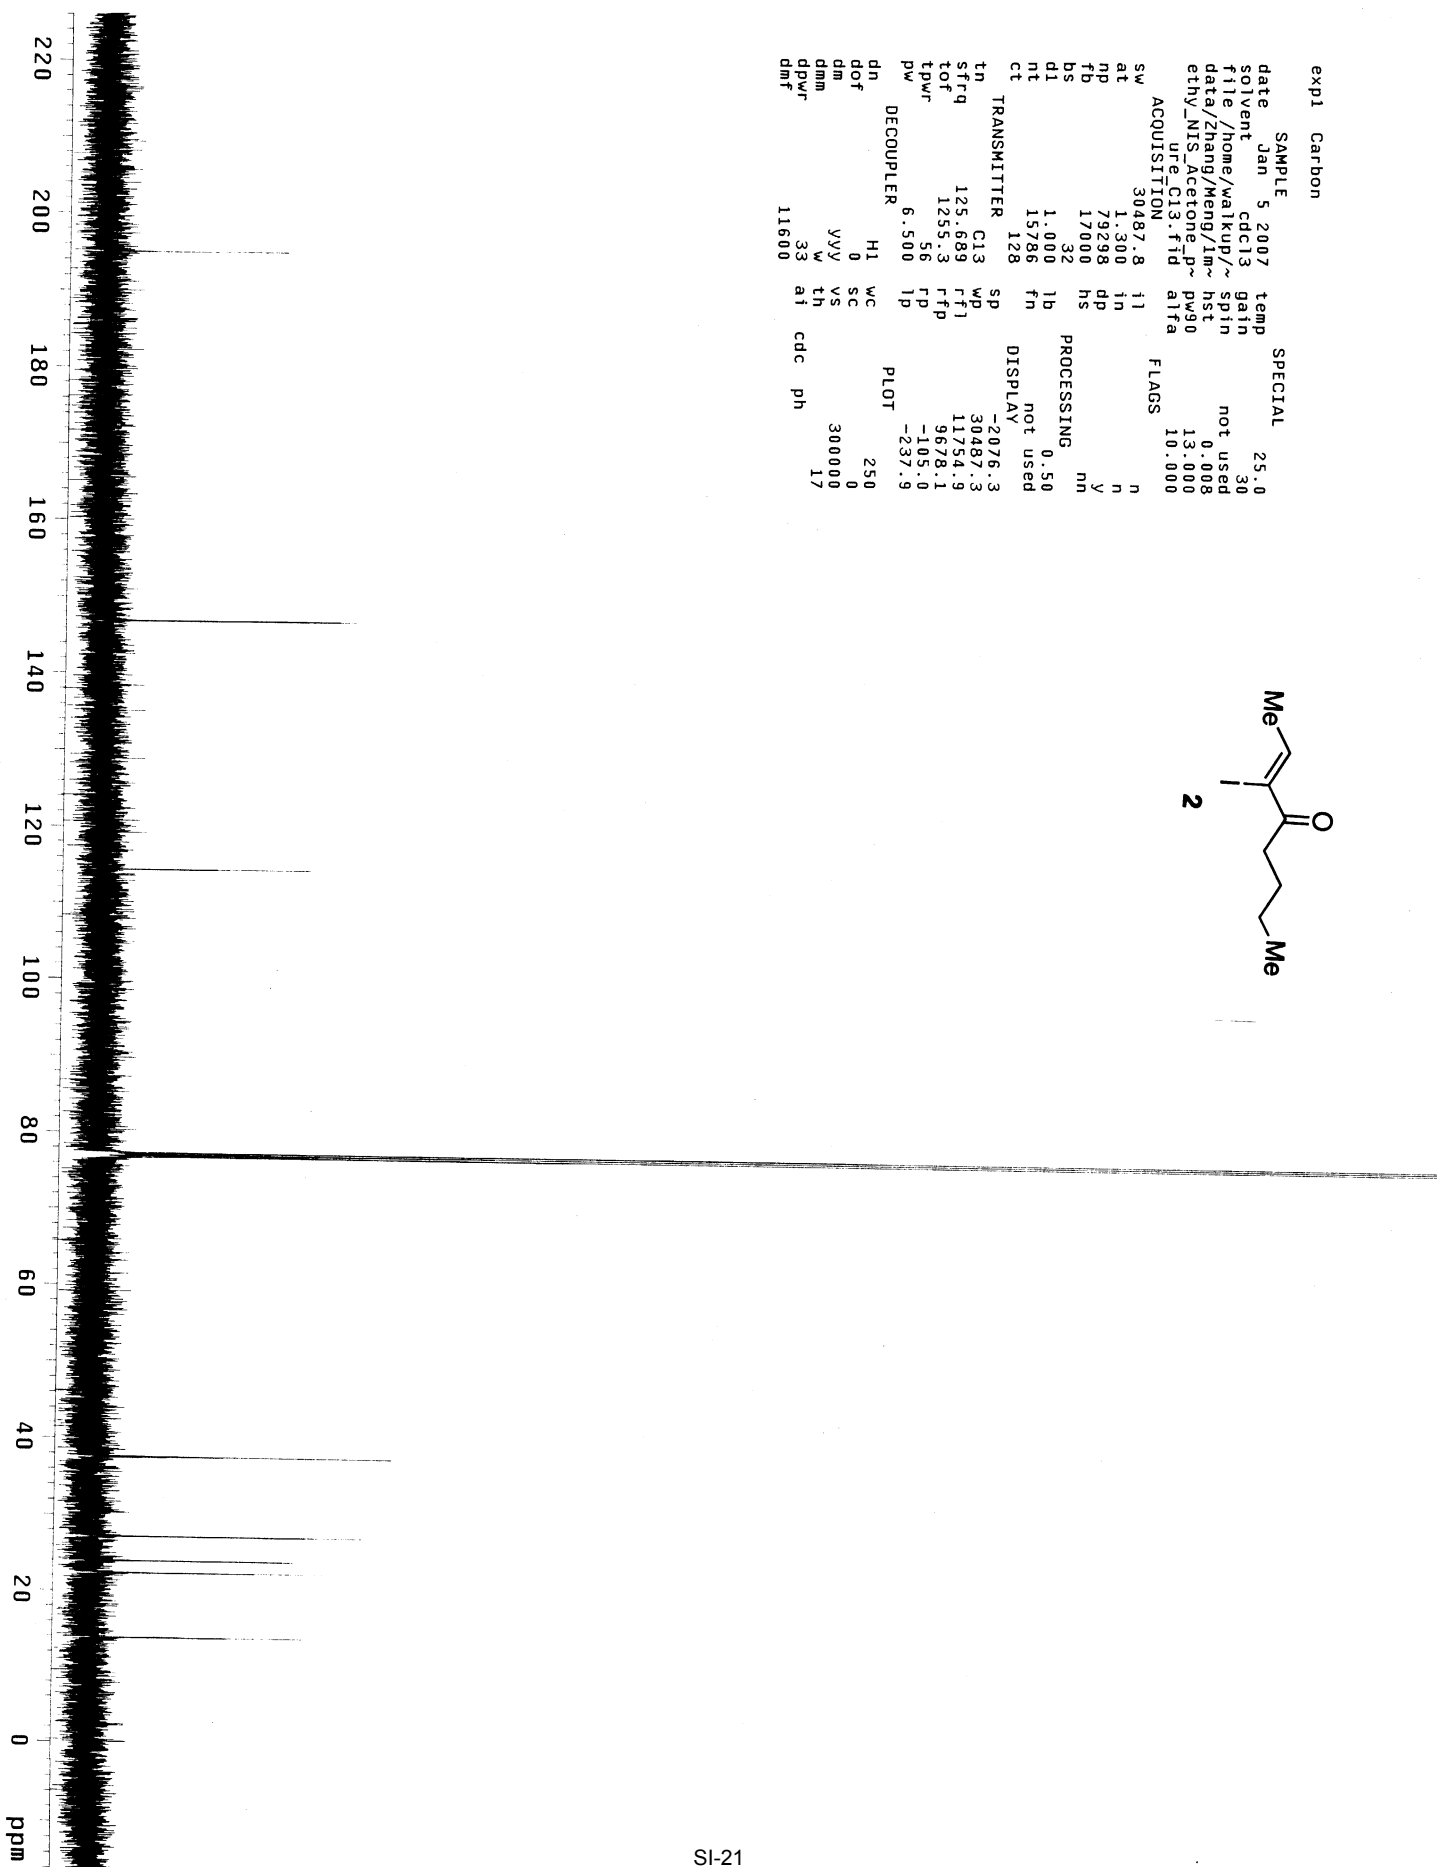

Automation directory: /home/walkup/vnmrSYS/data/2007.04.10\_60  
File: /home/walkup/data/Zhang/Meng/neozy\_1me\_NIS\_2.fid  
Sample id: tmpstudy

Pulse Sequence: NOESY1D

Solvent: cdcl3  
Temp: 25.0 C / 298.1 K  
Operator: walkup  
File: neozy\_1me\_NIS\_2  
VNMRS-500 "nmr500"

Relax. delay 1.000 sec  
Pulse 90.0 degrees  
Mixing 0.500 sec  
Acq. time 1.998 sec  
Width 8012.8 Hz  
96 repetitions  
OBSERVE H1, 499.8058870 MHz  
DATA PROCESSING  
Line broadening 0.5 Hz  
FT size 32768  
Total time 10 hr, 36 min, 14 sec

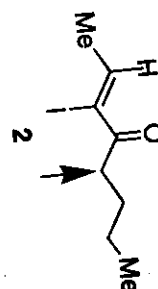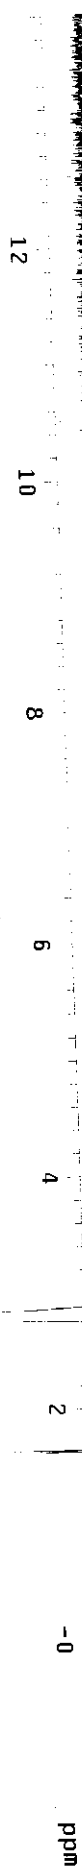

Automation directory: /home/walkup/vnmrsys/data/auto\_2007.04.10\_60  
File : /home/walkup/data/Zhang/Meng/neozy\_1me\_NIS\_3.fid  
Sample id : tmpstudy

Pulse Sequence: NOESY1D  
Solvent: cdcl3  
Temp: 25.0 C / 298.1 K  
Operator: walkup  
File: neozy\_1me\_NIS\_3  
VNMRS-500 "nmr500"

Relax. delay 1.000 sec  
Pulse 90.0 degrees  
Mixing 0.500 sec  
Acq. time 1.998 sec  
Width 8012.8 Hz  
136 repetitions  
OBSERVE H1, 499.8058870 MHz  
DATA PROCESSING  
Line broadening 0.5 Hz  
FT size 32768  
Total time 10 hr, 50 min, 9 sec

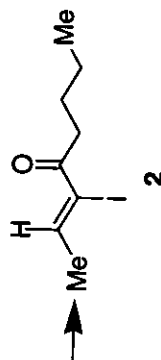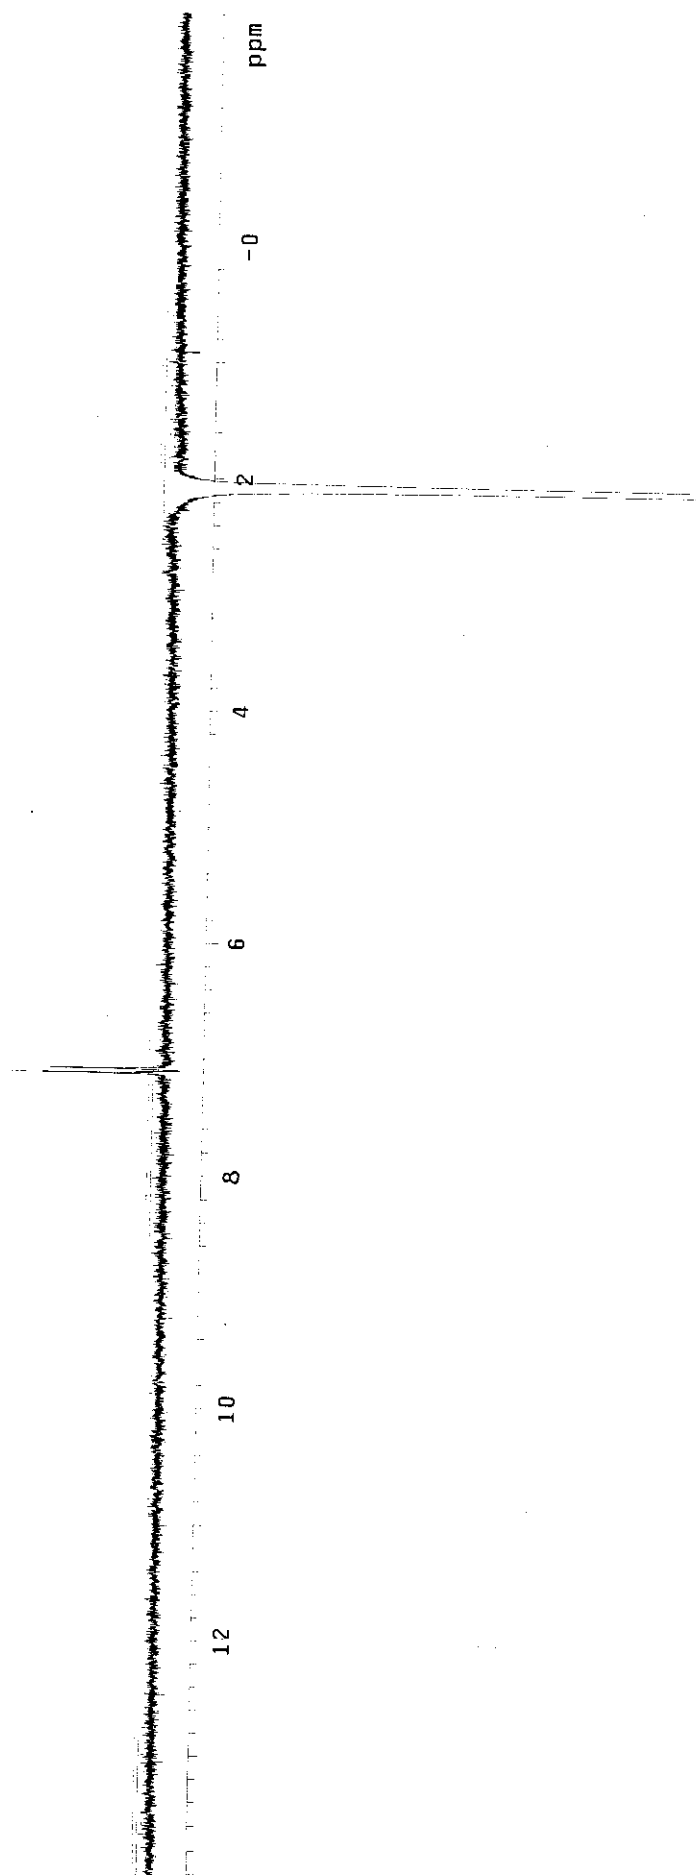

Automation directory: /home/walkup/vnmrSYS/data/auto.2007.04.10\_60  
File : /home/walkup/data/Zhang/Meng/neozy\_ime\_NIS\_3.fid  
Sample id : tmpstudy

Pulse Sequence: NOESY1D

Solvent: cdcl3  
Temp. 25.0 C / 298.1 K  
Operator: walkup\_NIS\_3  
File: neozy\_ime\_NIS\_3  
VNMR-500 "nmr500"

Relax. delay 1.000 sec  
Pulse 90.0 degrees  
Mixing 0.500 sec  
Acq. time 1.998 sec  
Width 8012.8 Hz  
136 repetitions  
OBSERVE H1, 499.8058870 MHz  
DATA PROCESSING  
Line broadening 0.5 Hz  
FT size 32768  
Total time 10 hr, 50 min, 9 sec

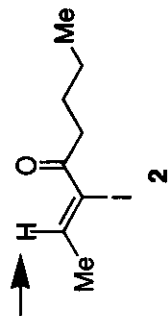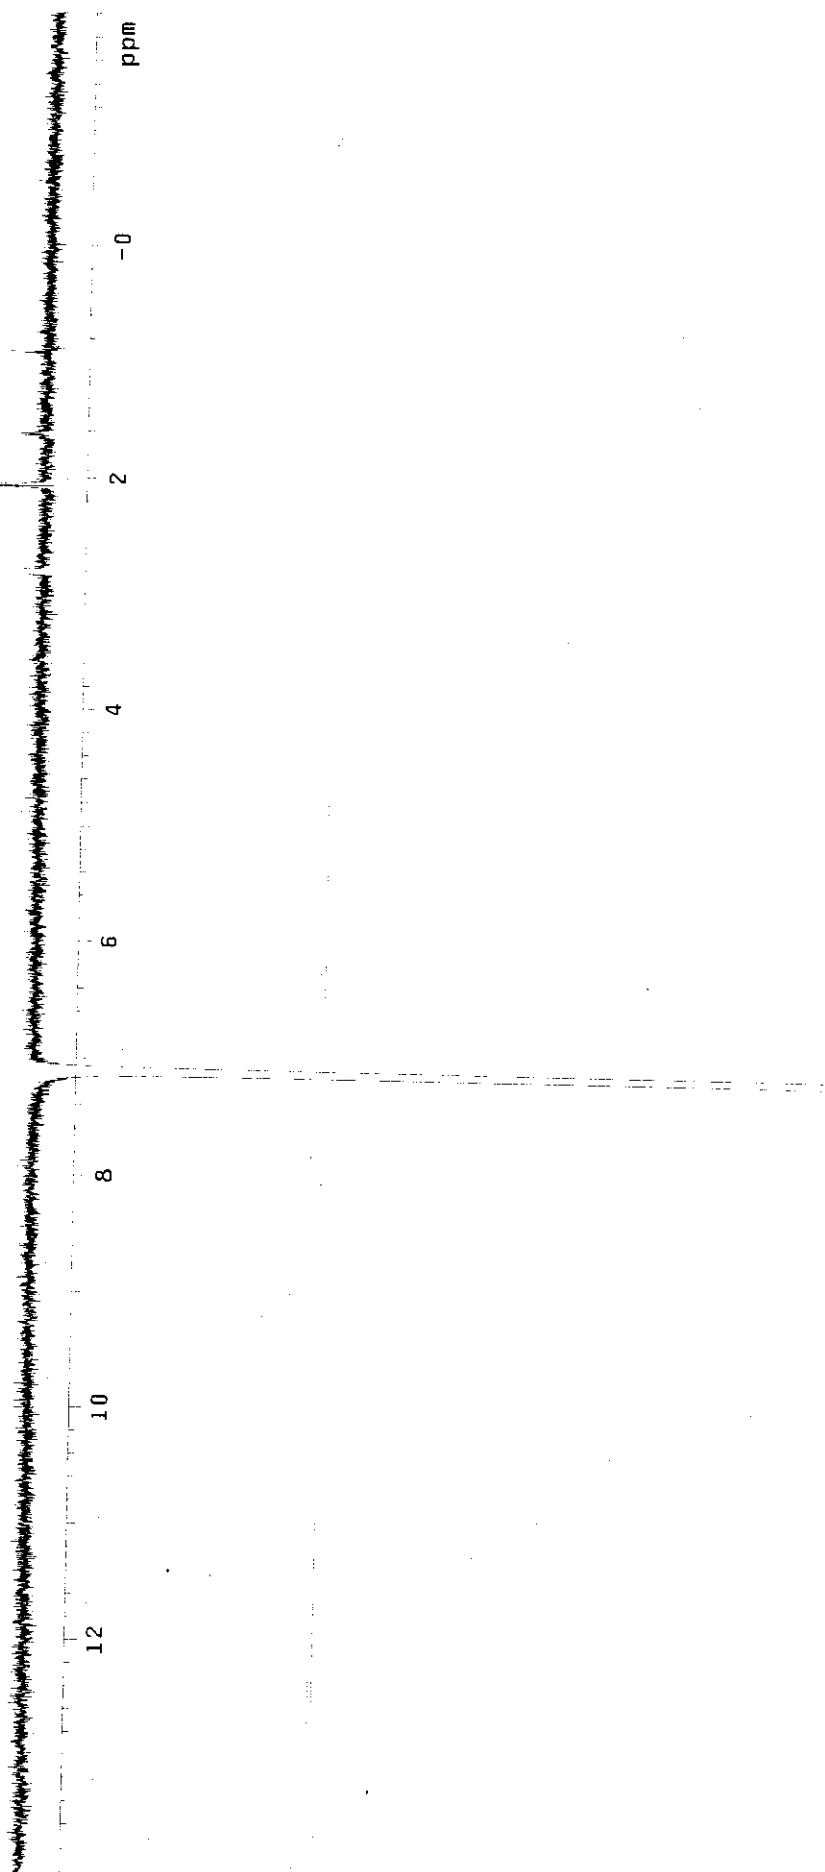



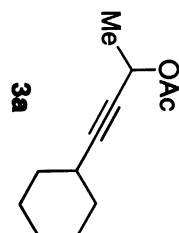

exptl Proton

| SAMPLE              |                 | SPECIAL |          |
|---------------------|-----------------|---------|----------|
| date                | Feb 16 2007     | temp    | 25.0     |
| solvent             | cdcl3           | gain    | not used |
| file                | /home/walkup/~  | spin    | not used |
| data                | /Zhang/Meng/JM~ | hst     | 0.008    |
| e_C6_acetate-SM-H1~ |                 | pw90    | 14.700   |
|                     |                 | alt     | 6.600    |

  

| ACQUISITION |        | PROCESSING |       |
|-------------|--------|------------|-------|
| sw          | 8012.8 | 11         | n     |
| at          | 2.049  | in         | n     |
| np          | 32830  | dp         | y     |
| fb          | 4000   | hs         | n     |
| bs          | 32     |            |       |
| ss          | 2      |            |       |
| dl          | 1.000  | 1b         | fn    |
| nt          | 8      |            | 65536 |

  

| TRANSMITTER |         | DISPLAY |        |
|-------------|---------|---------|--------|
| ct          | 8       | sp      | -501.0 |
| tn          | H1      | wp      | 4494.3 |
| stfq        | 499.809 | rfl     | 1003.8 |
| tof         | 499.7   | rtp     | 0      |
| tpwr        | 54      | lp      | -155.6 |
| pw          | 7.350   |         | -36.5  |

  

| DECOUPLER |       | PLOT |     |
|-----------|-------|------|-----|
| dn        | C13   | wc   | 250 |
| dof       | 0     | sc   | 0   |
| dm        | nnn   | th   | 100 |
| dmm       | c     | at   | cdc |
| dpwr      | 34    |      | ph  |
| dmf       | 32258 |      |     |

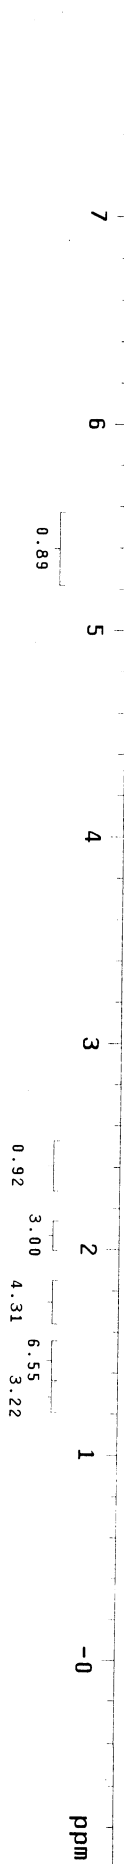

Automation directory: /home/walkup/vnmrsvs/data/auto\_2007.02.16\_10  
File : Aug.04/data/cdc13\_01.fid  
Sample id : Aug.04

Pulse Sequence: s2pul

Solvent: cdc13  
Temp.: 25.0 C / 298.1 K  
Operator: walkup  
File: cdc13\_01  
VNMRS-500 "nmr500"

Relax. delay 1.000 sec  
Pulse 45.0 degrees  
Acq. time 1.300 sec  
Width 30487.8 Hz  
64 repetitions  
OBSERVE C13, 125.6762906 MHz  
DECOUPLE H1, 499.8083861 MHz  
Power 39 dB  
continuously on  
WALTZ-16 modulated  
DATA PROCESSING  
Line broadening 0.5 Hz  
FT size 131072  
Total time 9 min, 51 sec

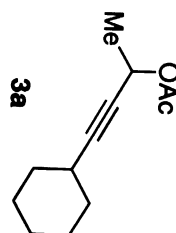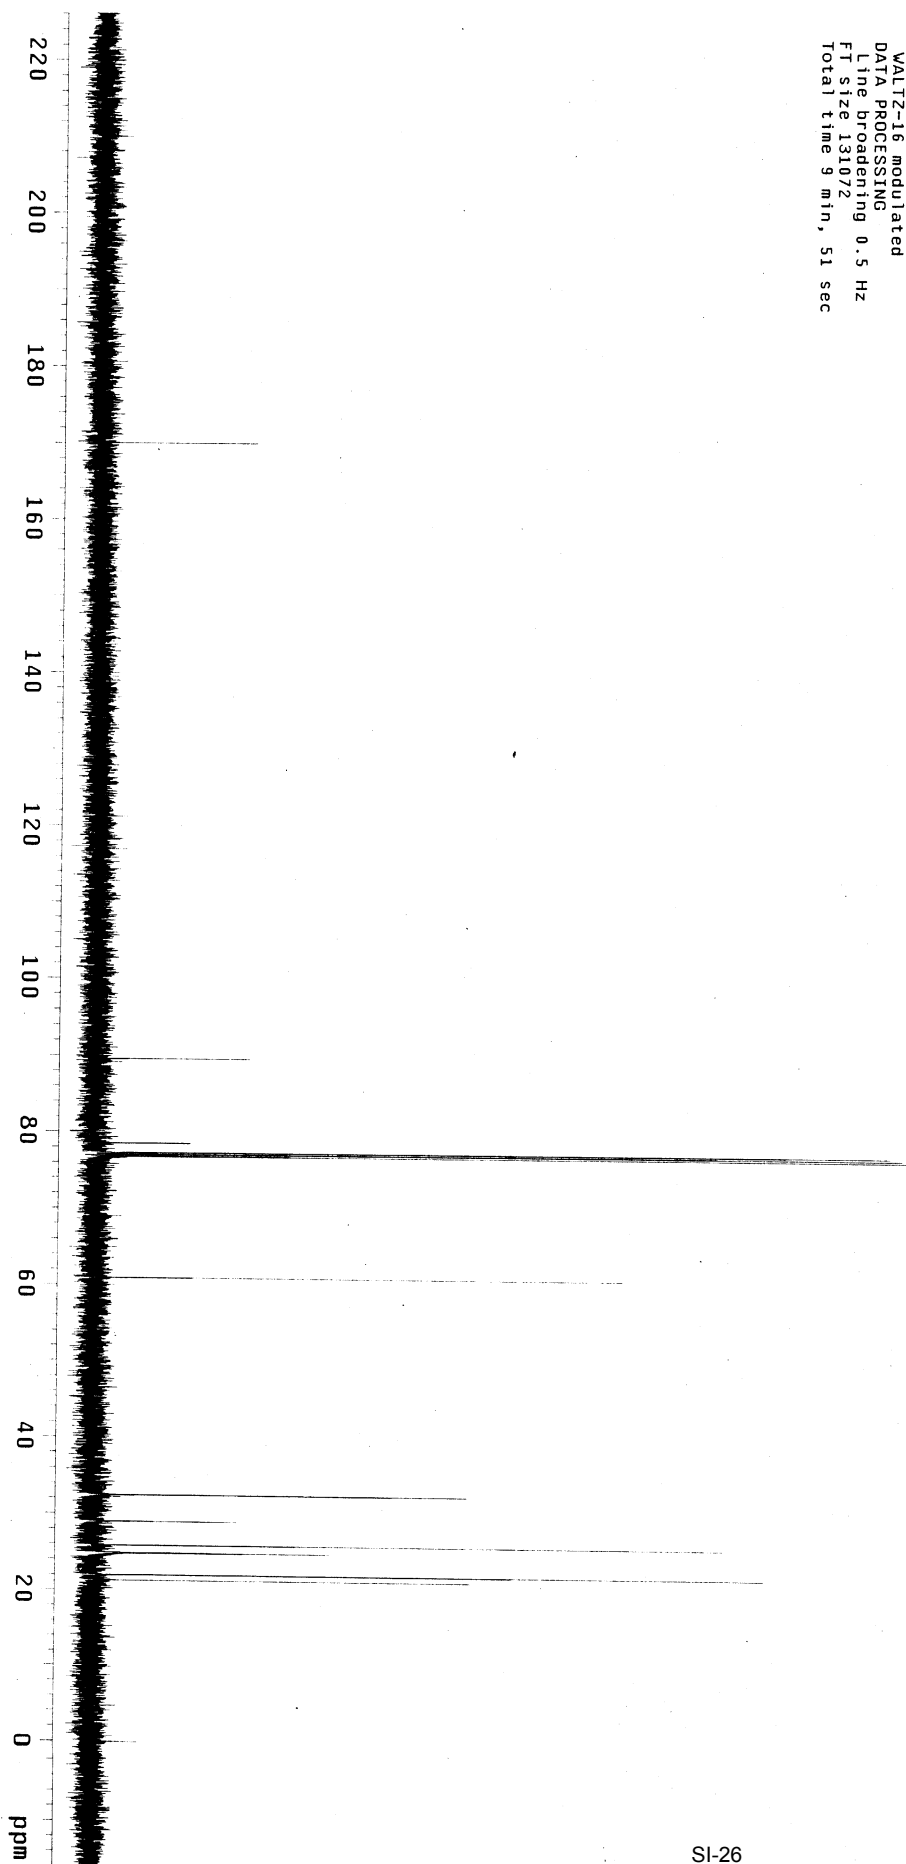

Automation directory: /home/walkup/vnmrSYS/data/auto\_2007.02.16\_10  
 File : Aug\_02/data/cdc13\_01.fid  
 Sample id : Aug.02

Pulse Sequence: s2pul  
 Solvent: cdc13  
 Temp: 25.0 C / 298.1 K  
 Operator: walkup  
 File: cdc13\_01  
 VNMRS-500 "hmr500"

Relax. delay 1.000 sec  
 Pulse 45.0 degrees  
 Acq. time 2.049 sec  
 Width 8012.8 Hz  
 8 repetitions  
 OBSERVE H1, 499.805822 MHz  
 DATA PROCESSING  
 Line broadening 0.2 Hz  
 FT size 65536  
 Total time 0 min, 30 sec

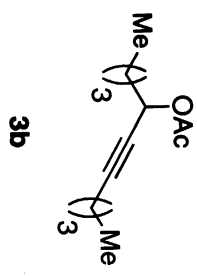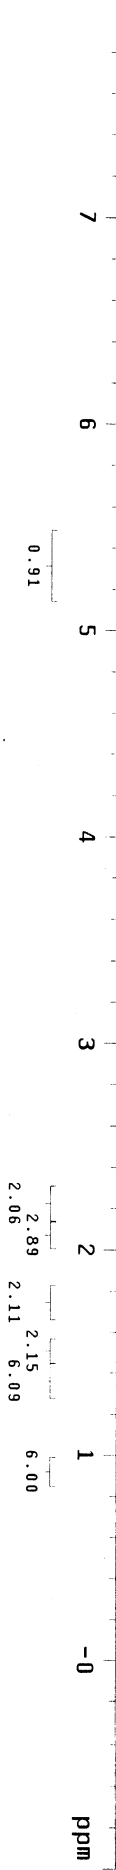

Automation directory: /home/waikup/vnmrSYS/data/auto\_2007.02.16\_10  
File : Aug.03/data/cdc13\_01.fid  
Sample id : Aug.03

Pulse Sequence: szpul  
Solvent: cdcl3  
Temp. 25.0 C / 298.1 K  
Operator: waikup  
File: cdc13\_01  
VNMRS-500 "nmr500"

Relax. delay 1.000 sec  
Pulse 45.0 degrees  
Acq. time 1.300 sec  
Width 30487.8 Hz  
64 repetitions  
OBSERVE C13, 125.6762906 MHz  
DECOUPLE H1, 499.8083861 MHz  
Power 39 dB  
continuously on  
WALTZ-16 modulated  
DATA PROCESSING  
Line broadening 0.5 Hz  
FT size 131072  
Total time 9 min, 51 sec

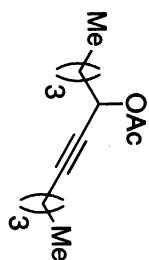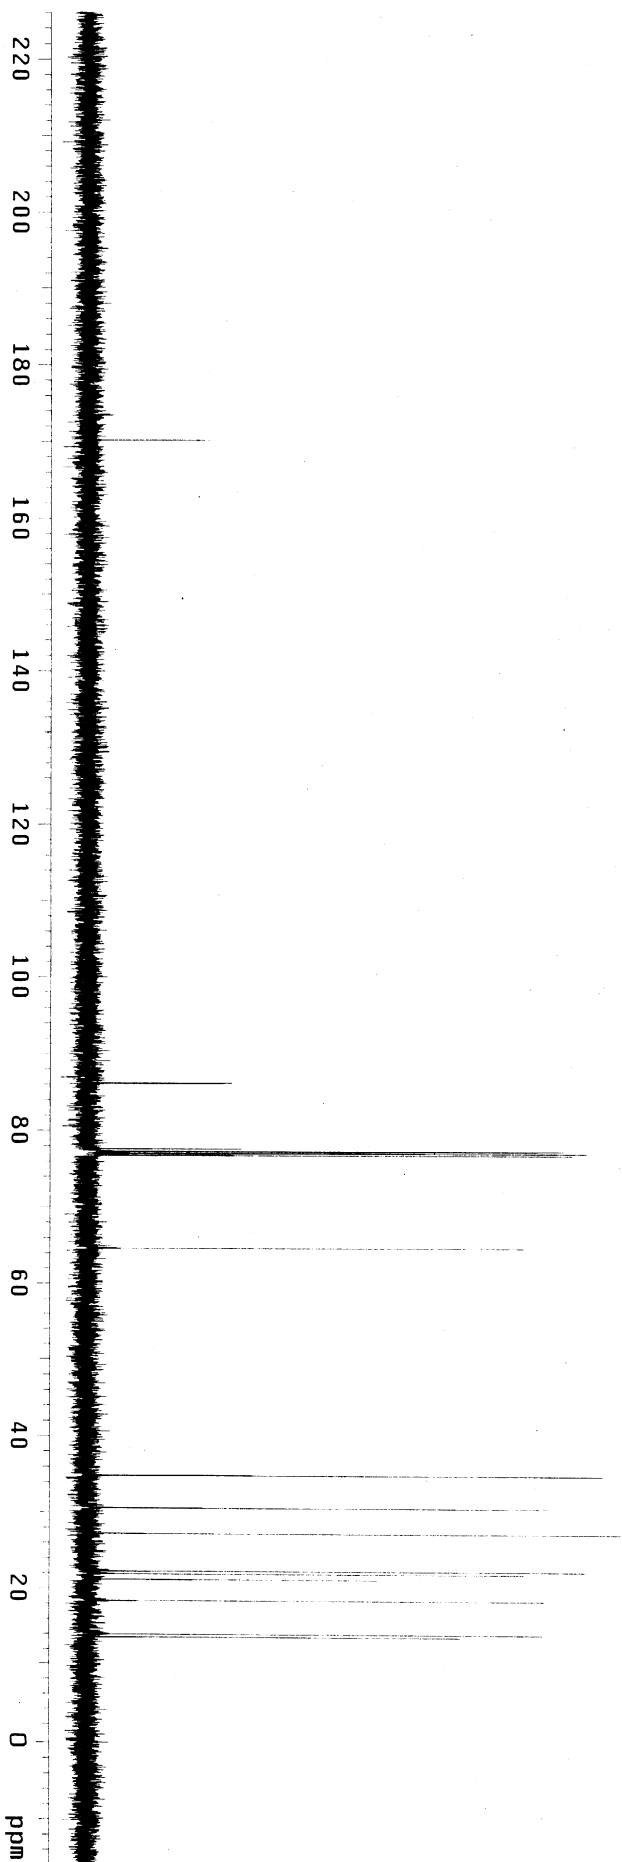

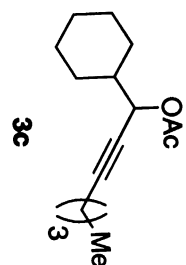

```

expt Proton

SAMPLE
date Feb 16 2007 temp 25.0
solvent cdc13 gain not used
file /home/walkup/~ spin not used
vnmrsvs/data/auto_~ hsf 0.008
2007.02.16_10/AUG.~ pw90 14.700
01/data/cdc13_01.f~ alfa 6.600

SPECIAL
id 11 flags n
ACQUISITION
sw 8012.8 in n
at 2.049 dp y
np 32830 hs n
fb 4000
bs 32 lb
ss 2 fn
d1 1.000 DISPLAY -41.0
nt 8 sp 4030.4
ct 8 wp 1007.6
tn TRANSMITTER H1 rfp 0
sfreq 499.809 rf 154.2
tof 499.7 lp -39.2
tpwr 54 PLOT 250
pw 7.350 wc 0
DECOUPLER C13 sc 0
dn 0 vs 424
dof 0 th 50
dm nn ai cdc ph
dmm c
dpwr 34
dmf 32258

```

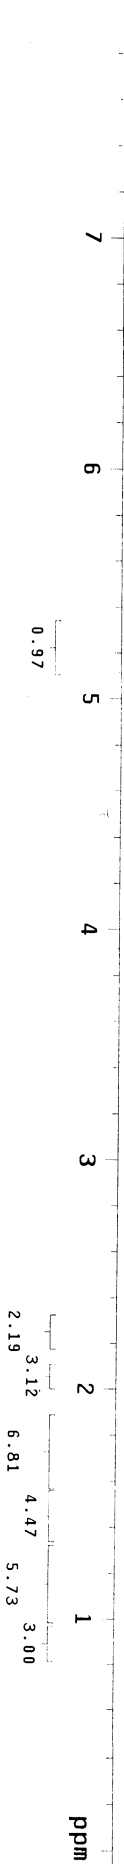

expt Carbon

SAMPLE SPECIAL 25.0  
date Feb 16 2007 temp 30  
solvent cdc13 gain 30  
file /home/walkup/~ not used  
vnmr/sv/data/auto/~ hst 0.008  
2007.02.16\_10/AUG.~ pw90 15.300  
02/data/cdc13\_01.f~ alfa 10.000

id id  
ACQUISITION  
sw 30487.8 f1 n  
at 1.300 in n  
np 79298 dp y  
fb 17000 hs n  
bs 32 lb PROCESSING 0.50  
dl 1.000 fn not used  
nt 500  
ct 64 DISPLAY  
TRANSMITTER  
tn C13 sp -2077.7  
sfrq 125.689 wp 30487.3  
tof 1255.3 rfi 11756.2  
tpwr 49 rp 9678.1  
pw 7.650 lp 150.8  
DECOUPLER PLOT -253.5  
dn H1 WC 250  
dof HI SC 0  
dm 0 VS 24229  
dmm YVY th 6  
dpwr w ai cdc ph  
dmf 12200

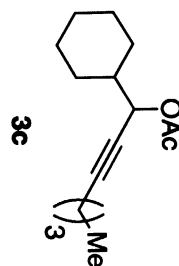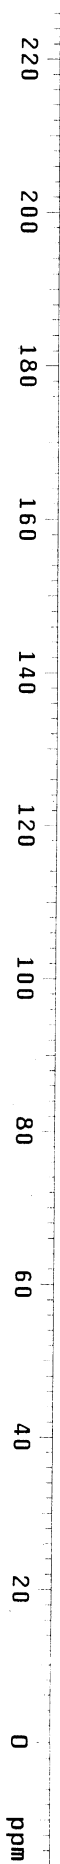

## STANDARD 1H OBSERVE - profile

exp2 Proton

| SAMPLE               |                | SPECIAL    |          |
|----------------------|----------------|------------|----------|
| date                 | Apr 9 2006     | temp       | 25.0     |
| solvent              | cdcl3          | gain       | not used |
| file                 | /home/waikup/~ | spin       | not used |
| nmrsvs/data/Bel1/~   | hst            | 0.008      |          |
| Violet/auto-2006.04~ | pw90           | 13.900     |          |
| .09_06/s_0_01/data~  | alpha          | 6.600      |          |
| ACQUISITION: f1d     |                | FLAGS      | n        |
| sw                   | 6410.3         | in         | n        |
| at                   | 2.049          | dp         | y        |
| np                   | 26264          | hs         | nn       |
| fb                   | 4000           | PROCESSING |          |
| bs                   | 32             | lb         | 0.20     |
| ss                   | 2              | fn         | 65536    |
| d1                   | 1.000          | DISPLAY    |          |
| nt                   | 8              | sp         | -169.8   |
| ct                   | 8              | wp         | 3766.6   |
| TRANSMITTER          |                | rf1        | 806.4    |
| tn                   | H1             | rfp        | 0        |
| stfq                 | 399.782        | rp         | 72.5     |
| tof                  | 399.5          | tp         | -26.7    |
| tpwr                 | 59             | PLOT       |          |
| pw                   | 6.950          | wc         | 250      |
| DECOUPLER            |                | sc         | 0        |
| dn                   | C13            | vs         | 55       |
| dof                  | 0              | th         | 2        |
| dm                   | nmn            | at         | cdc ph   |
| dmm                  | C              |            |          |
| dpwr                 | 34             |            |          |
| dmf                  | 29412          |            |          |

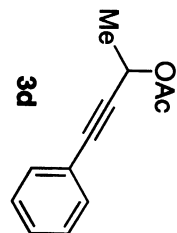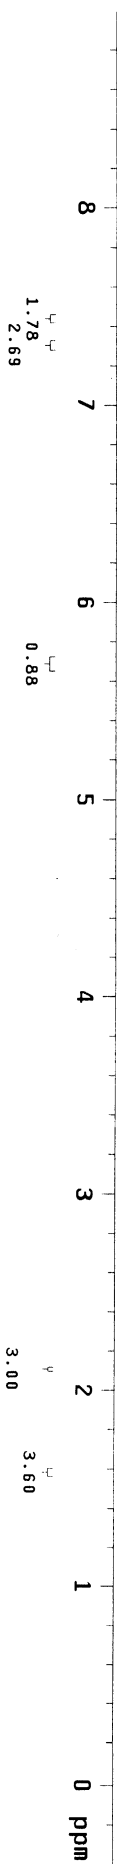

## STANDARD 1H OBSERVE - profile

exp2 Carbon

SAMPLE SPECIAL  
date Apr 9 2006 temp 25.0  
solvent cdc13 gain 30  
file /home/waikup/~ hst not used  
vnmrsvs/data/Be11/~ pw90 0.008  
Voiet/auto\_2006.04~ 9.700  
.09\_06/s\_0\_02/data~ alfa 10.000  
/cdc13.01.fid  
ACQUISITION  
sw 24509.8 in n  
at 1.300 dp y  
np 63750 hs nn  
fb 17000  
bs 64 lb  
d1 1.000 fn not used  
nt 1024 DISPLAY  
ct 256 SP -1723.6  
TRANSMITTER C13 wp 24509.1  
tn rf1 9468.7  
strq 100.535 rfp 7740.4  
tof 1042.6 rp 121.2  
tpwr 55 1p -143.6  
pw 4.850  
DECOUPLER wc 250  
dn H1 SC 0  
dof 0 VS 50000  
dm YVY th 68  
dmm W  
dpwr 41  
dmf 9300

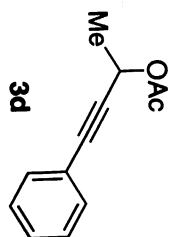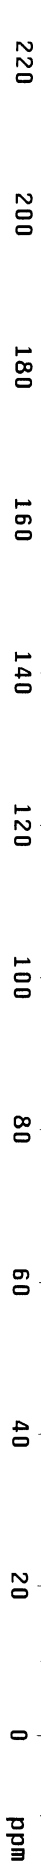



STANDARD 1H OBSERVE - profile

expt Proton

|                     |                |            |          |
|---------------------|----------------|------------|----------|
| SAMPLE              |                | SPECIAL    |          |
| date                | Apr 10 2006    | temp       | 25.0     |
| solvent             | cdcl3          | gain       | not used |
| file                | /home/walkup/~ | spin       | not used |
| nmrSYS/data/Frost~  | hst            | pw90       | 13.900   |
| /auto_2006.04.10_1~ | alpha          | 6.600      |          |
| 4/s_001/data/cdcl3  | 3.01.fid       | FLAGS      |          |
| ACQUISITION         |                | PROCESSING |          |
| sw                  | 6410.3         | in         | n        |
| at                  | 2.049          | dp         | y        |
| np                  | 26264          | hs         | nn       |
| fb                  | 4000           | lb         | 0.20     |
| bs                  | 32             | fn         | 65536    |
| ss                  | 2              | sd         | -163.5   |
| di                  | 1.000          | wp         | 3751.5   |
| nt                  | 8              | rf1        | 807.7    |
| ct                  | 8              | rfp        | 69.3     |
| tn                  | H1             | rfp        | -13.7    |
| stfq                | 399.782        | rfp        |          |
| tof                 | 399.5          | rfp        |          |
| tpwr                | 59             | WC         | 250      |
| pw                  | 6.950          | SC         | 0        |
| DECOUPLER           |                | VS         | 100      |
| dh                  | C13            | th         | 2        |
| dof                 | 0              | at         | cdc ph   |
| dm                  | nmh            |            |          |
| dmm                 | c              |            |          |
| dpwr                | 34             |            |          |
| dmf                 | 29412          |            |          |

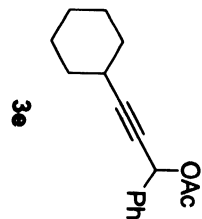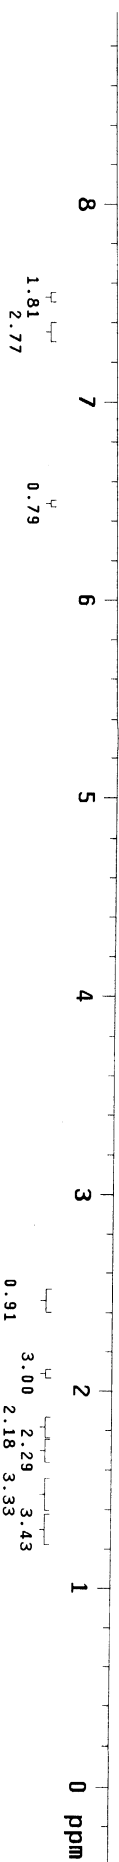

expi Carbon

SAMPLE SPECIAL 25.0  
date Apr 10 2006 temp  
solvent cdc13 gain 30  
file /home/walkup/~ spin  
vmrsvs/data/frost~ hsf not used  
/auto\_2006.04.10\_1~ pw90 0.008  
4/s\_01/data/cdc1~ alfa 9.700  
3\_02.fid 10.000  
ACQUISITION  
sw 24509.8 11 n  
at 1.300 1n in n  
np 63750 dp hs v  
fb 17000 hs PROCESSING nm  
bs 64 1b 0.50  
dl 1.000 fn not used  
nt 1024 1024 DISPLAY  
ct 448 448 SP -1722.8  
tn TRANSMITTER C13 WP 24509.1  
stfq 100.535 rfi 9463.9  
tof 1042.6 rfp 7740.4  
tpwr 55 1p 121.1  
pw 4.850 PLOT -133.3  
DECOUPLER WC 250  
dn H1 SC 0  
dof 0 VS 40000  
dm YYV th 68  
dmm W ai cdc ph  
dpwr 41  
dmf 9300

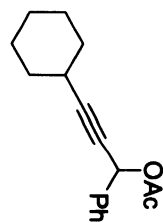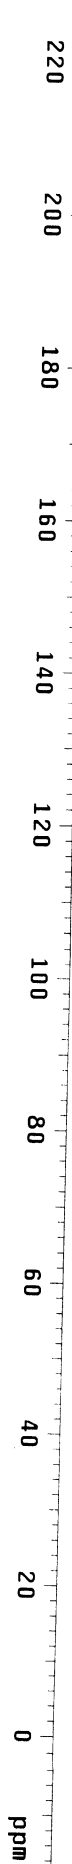

Automation directory: /home/walkup/vnmrSYS/data/auto\_2007.02.16\_10  
 File : Aug.06/data/cdc13\_01.fid  
 Sample id : Aug.06

Pulse Sequence: s2pul  
 Solvent: cdc13  
 Temp: 25.0 C / 298.1 K  
 Operator: walkup  
 File: cdc13\_01  
 VNMRS-500 "nmr500"

Relax. delay 1.000 sec  
 Pulse 45.0 degrees  
 Acq. time 2.049 sec  
 Width 8012.8 Hz  
 8 repetitions  
 OBSERVE H1, 499.805864 MHz  
 DATA PROCESSING  
 Line broadening 0.2 Hz  
 FT size 65536  
 Total time 0 min, 30 sec

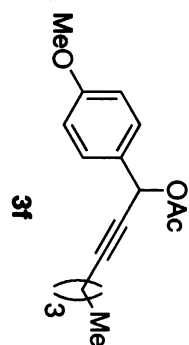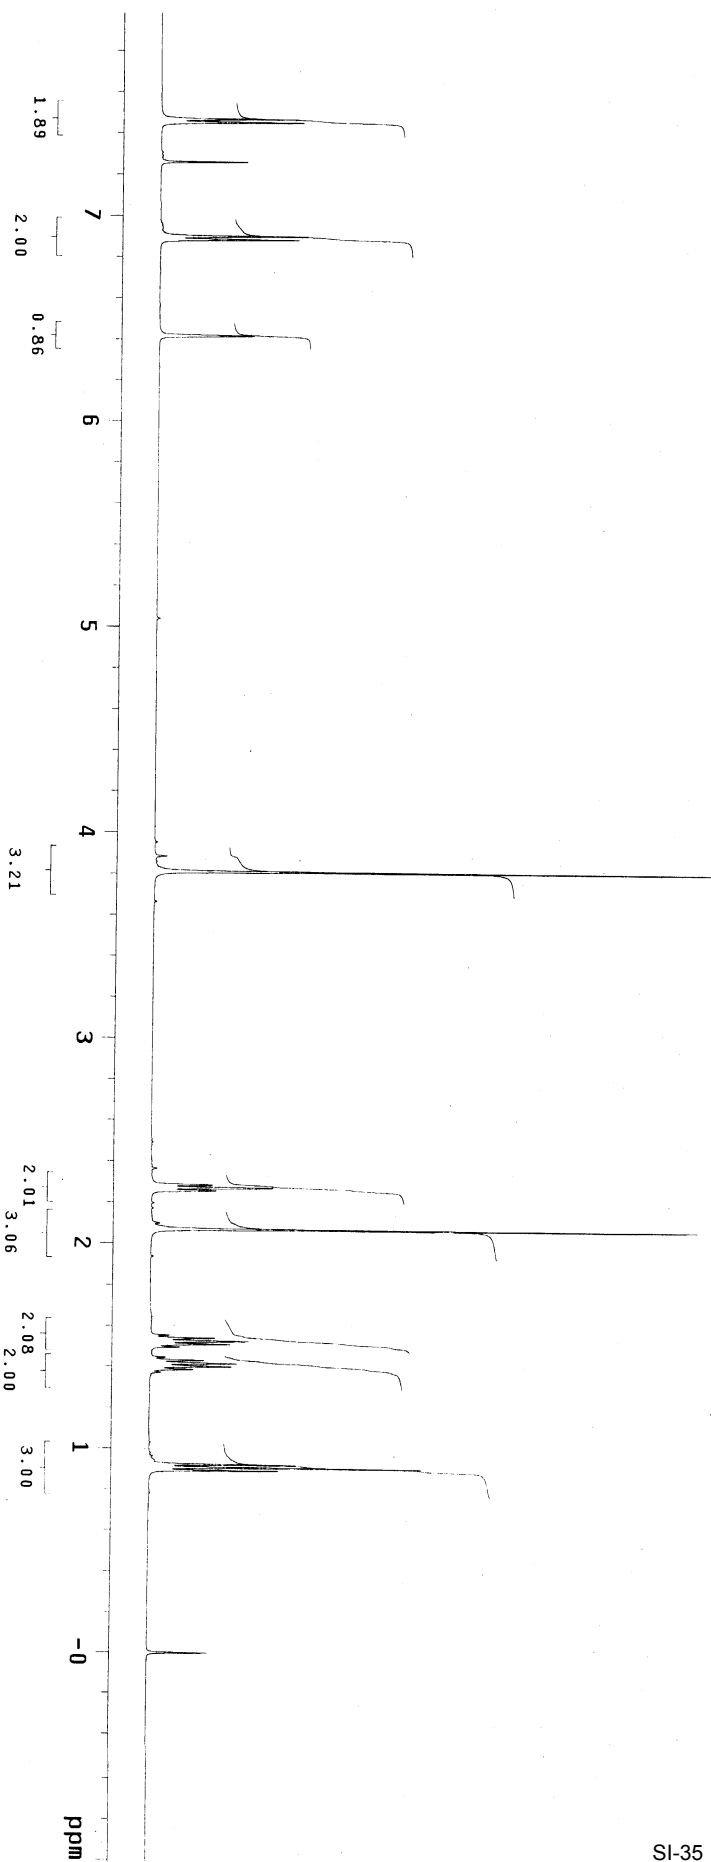

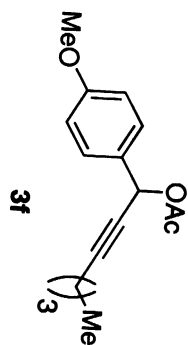

Automation directory: /home/walkup/vnmr/sys/data/auto\_2007.02.16\_10  
 File : Aug.07/data/cdc13\_01.fid  
 Sample id : Aug.07

Pulse Sequence: s2pul

Solvent: cdc13  
 Temp. 25.0 C / 298.1 K  
 Operator: walkup  
 File: cdc13\_01  
 VNMRS-500 "nmr500"

Relax. delay 1.000 sec  
 Pulse 45.0 degrees  
 Acq. time 1.300 sec  
 Width 30487.8 Hz  
 64 repetitions  
 OBSERVE C13, 125.6762919 MHz  
 DECOUPLE H1, 499.6083661 MHz  
 Power 39 dB  
 continuously on  
 WALTZ-16 modulated  
 DATA PROCESSING  
 Line broadening 0.5 Hz  
 FT size 131072  
 Total time 9 min, 51 sec

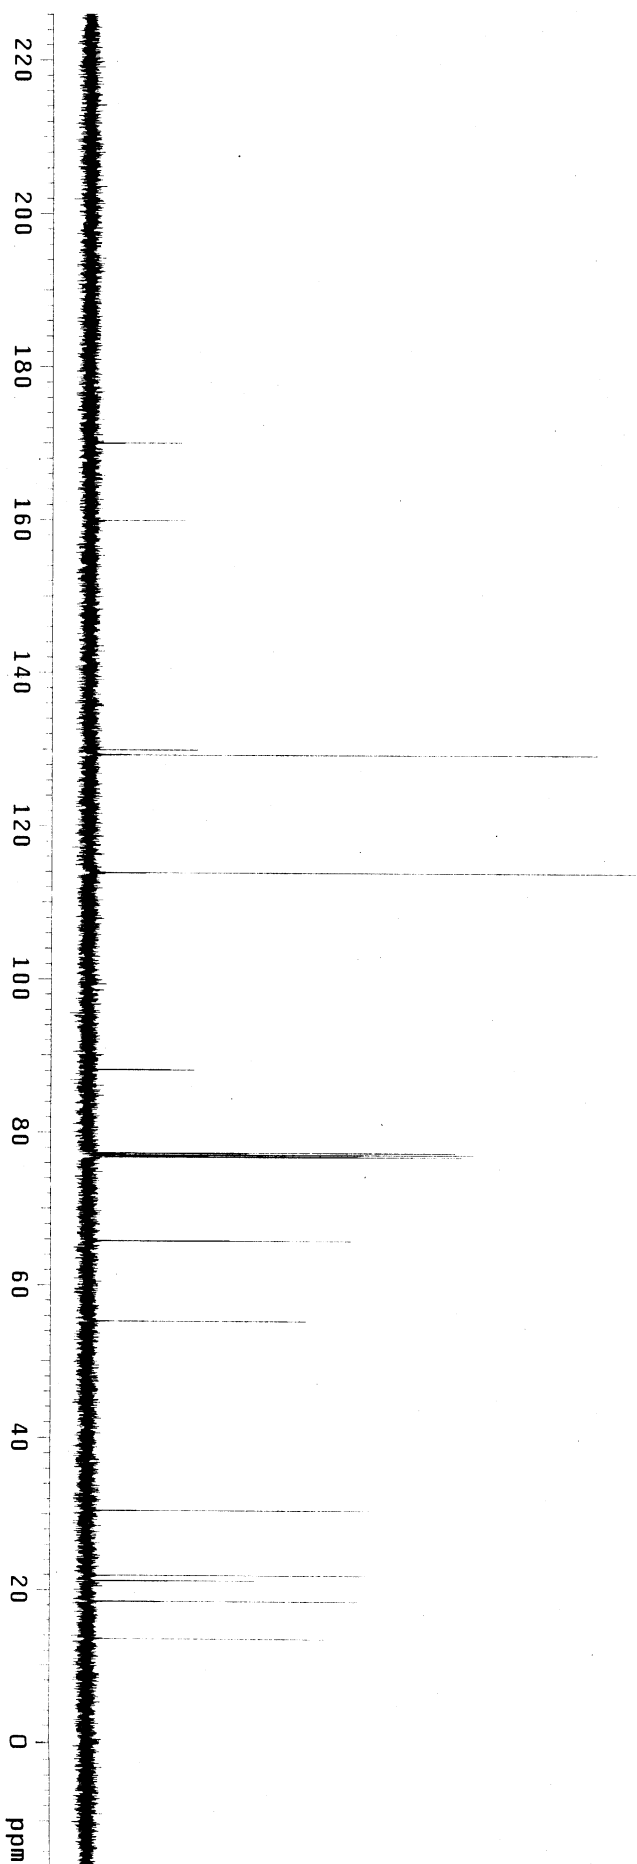

exp3 Proton

|             |                  |            |          |
|-------------|------------------|------------|----------|
| SAMPLE      |                  | SPECIAL    |          |
| date        | Feb 16 2007      | temp       | 25.0     |
| solvent     | cdcl3            | gain       | not used |
| file        | /home/walkup/~   | spin       | not used |
| data        | Zhang/Meng/CF~   | hst        | 0.008    |
|             | 3-acetate-H1.fid | pw90       | 13.900   |
| ACQUISITION |                  | ai         | 6.500    |
| sw          | 6410.3           | fl         | 6.500    |
| at          | 2.049            | in         | n        |
| np          | 26264            | dp         | n        |
| fb          | 4000             | ys         | y        |
| bs          | 32               | hs         | nn       |
| ss          | 2                | PROCESSING |          |
| d1          | 1.000            | lb         | 0.20     |
| nt          | 8                | fn         | 65536    |
| ct          | 8                | DISPLAY    |          |
| TRANSMITTER |                  | sp         | -400.1   |
| tn          | H1               | wp         | 4000.7   |
| sfreq       | 399.782          | rf1        | 3707.9   |
| tot         | 399.5            | rtp        | 2902.4   |
| tpwr        | 59               | rp         | -157.7   |
| pw          | 6.950            | lp         | -34.0    |
| DECOUPLER   |                  | PLOT       |          |
| dn          | C13              | wc         | 250      |
| dof         | 0                | sc         | 0        |
| dm          | nnn              | vs         | 54       |
| dmm         | c                | th         | 44       |
| dpwr        | 34               | ai         | cdc ph   |
| dnt         | 29412            |            |          |

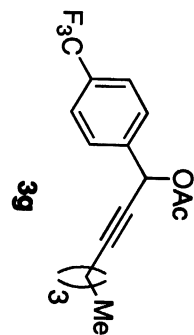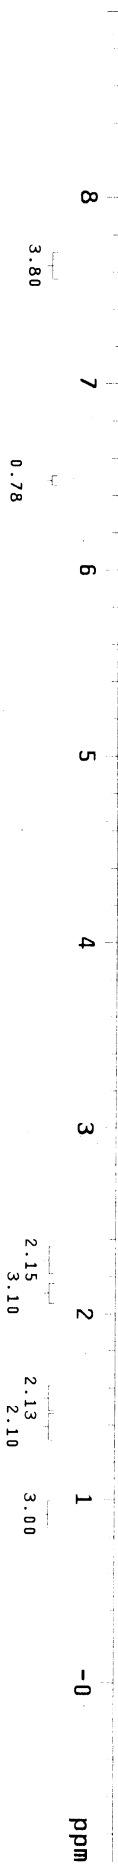

exp3 Carbon

SAMPLE SPECIAL 25.0  
date Feb 18 2007 temp 30  
solvent cdc13 gain 30  
file /home/walkup/- spin not used  
vnmr/sys/data/autoc-hst 0.008  
2007.02.18.10/5.20- pw90 9.700  
070218\_002/data/cd- alfa 10.000  
c13-01.fid  
ACQUISITION  
sw 24509.8 in n  
at 1.300 dp y  
np 63750 hs nm  
fb 17000  
bs 32 lb not used  
d1 1.000 tn  
nt 25600 DISPLAY  
ct 2464 SP -1723.0  
tn TRANSMITTER C13 WD 24509.1  
sfreq 100.535 rfi 9464.9  
tof 1042.6 rfp 7741.2  
tpwr 1p 50.5  
pw 4.850 PLOT -189.5  
DECOUPLER WC 250  
dn H1 SC 0  
dof 0 VS 89494  
dm YVY th 4  
dmm w ai cdc ph  
dpwr 41  
dmf 9300

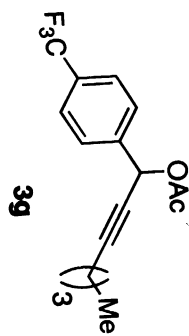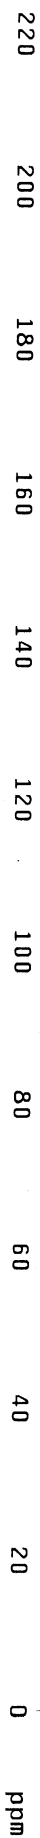

expt1 Proton

| SAMPLE      |                                                                   | SPECIAL  |        |
|-------------|-------------------------------------------------------------------|----------|--------|
| date        | Feb 1 2007                                                        | temp     | 25.0   |
| solvent     | cdcl3                                                             | gain     | 30     |
| file        | /home/vnmr1/~/mr400/waikup/data/~Zhang/GuoZhu/H1-20~070201-71.fid | not used | 0.008  |
|             |                                                                   | pw90     | 13.900 |
|             |                                                                   | alpha    | 6.600  |
| ACQUISITION |                                                                   | FLAGS    |        |
| sw          | 6410.3                                                            | 11       | n      |
| at          | 2.049                                                             | in       | n      |
| np          | 26264                                                             | dp       | y      |
| fb          | 4000                                                              | hs       | nn     |
| bs          | 8                                                                 | 1b       | nn     |
| dl          | 1.000                                                             | 1b       | nn     |
| nt          | 8                                                                 | fn       | 65536  |
| ct          | 8                                                                 | fn       | 65536  |
| TRANSMITTER |                                                                   | SP       | DISP   |
| tn          | H1                                                                | wp       | -512.9 |
| sfrq        | 399.782                                                           | rfl      | 3906.4 |
| tof         | 399.5                                                             | rfl      | 800.1  |
| tpwr        | 59                                                                | rp       | -44.7  |
| pw          | 6.950                                                             | 1p       | -26.3  |
| DECOUPLER   |                                                                   | 1p       | PLOT   |
| dn          | C13                                                               | wc       | 250    |
| dof         | 0                                                                 | sc       | 0      |
| dm          | nnn                                                               | vs       | 1981   |
| dmm         | c                                                                 | th       | 2      |
| dpwr        | 34                                                                | ai       | cdc    |
| dmf         | 29412                                                             | ph       |        |

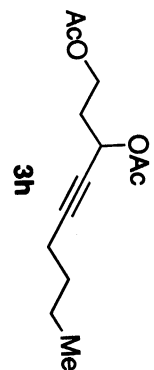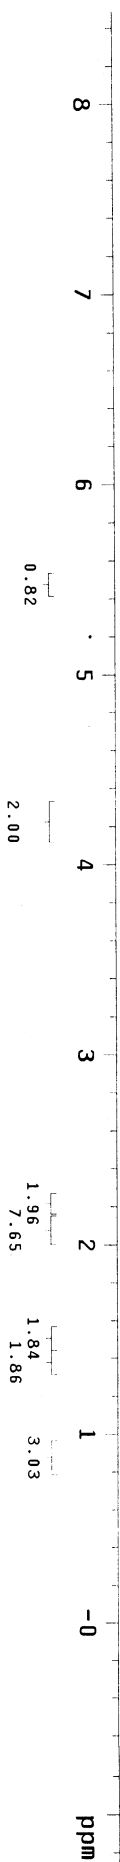

expl Carbon

SAMPLE SPECIAL 25.0  
date Feb 5 2007 temp 30  
solvent cdc13 gain 30  
file /home/vnmr1/nr not used  
mr500/waikup/data/~nst 0.008  
Zhang/Guozhu/C13-2- pw90 15.300  
0070205-71-2.fid alfa 10.000  
ACQUISITION  
sw 30487.8 f1 n  
at 1.300 in n  
nd 79298 dp v  
fb 17000 hs n  
bs 12 h  
d1 1.000 lb 0.50  
nt 12000 fn not used  
ct 912  
TRANSMITTER  
tn C13 sp -2080.1  
sfrq 125.689 wp 30487.3  
tof 1255.3 rfi 11757.6  
tpwr 49 rfp 9677.1  
pw 7.650 lp -33.4  
DECOUPLER H1 PLOT -255.6  
dn HI WC 250  
dof 0 SC 0  
dm YVY VS 14325  
dmm W th ai cdc ph 9  
dpwr 39  
dmf 12200

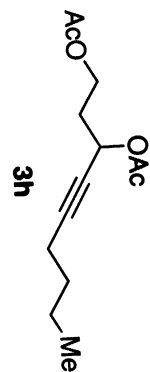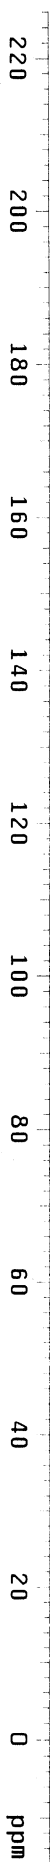



expl Proton

SAMPLE date Feb 10 2007 temp 25.0  
 solvent cdc13 gain 30  
 file /home/vnmr1/n- not used  
 mr400/waikup/data/~ hst 0.008  
 Zhang/Guozhu/H1-20~ pw90 13.900  
 070210-83.fid alpha 6.600

ACQUISITION  
 sw 6410.3 f1  
 at 2.049 in  
 np 26264 dp  
 fd 4000 hs  
 bs 8  
 d1 1.000 lb  
 nt 8 fn  
 ct 8

TRANSMITTER  
 tn H1 sp  
 stfq 399.782 rfi  
 tof 399.5 rfd  
 tpwr 59 fp  
 pw 6.950 lp

DECOUPLER  
 dn C13 wc  
 dof 0 sc  
 dm nn vs  
 dmm c th  
 dpwr 34 ai  
 dmf 29412

PROCESSING  
 0.20  
 65536

DISPLAY  
 -510.4  
 4068.0  
 803.2  
 0  
 114.3  
 -26.7

PLOT  
 250  
 0  
 969  
 2

cds ph

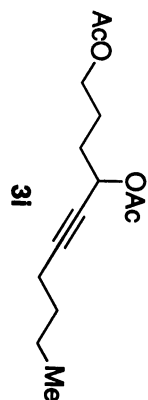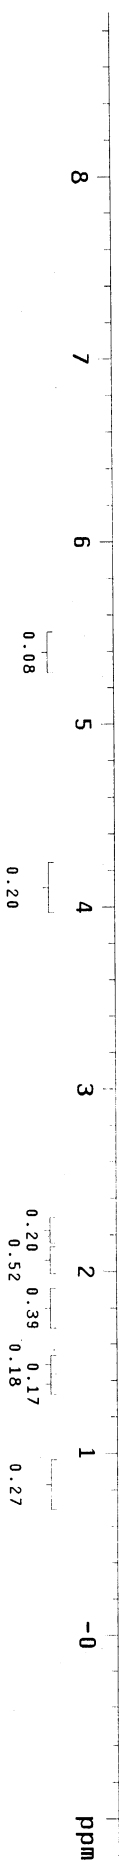

exp2 Carbon

SAMPLE SPECIAL  
date Feb 17 2007 temp 25.0  
solvent cdc13 gain 30  
title exp not used  
ACQUISITION hst 0.008  
sw 30487.8 pw90 15.300  
at 1.300 alfa 10.000  
np 79298  
fb 17000  
bs 12  
dl 1.000  
nt 12000  
ct 4176  
tn C13  
sfrq 125.689  
tof 1255.3  
tpwr 49  
pw 7.650  
DECOUPLER H1  
dn 0  
dof 0  
dm YYY  
dmm W  
dpwr 39  
dmf 12200  
ai cdc ph

PROCESSING 0.50  
not used  
DISPLAY  
-2077.8  
30487.3  
11755.3  
9677.1  
147.4  
-253.9  
PLOT 250  
0  
143347  
10

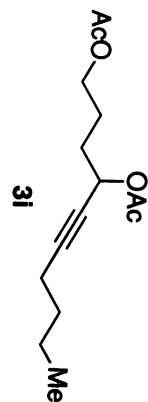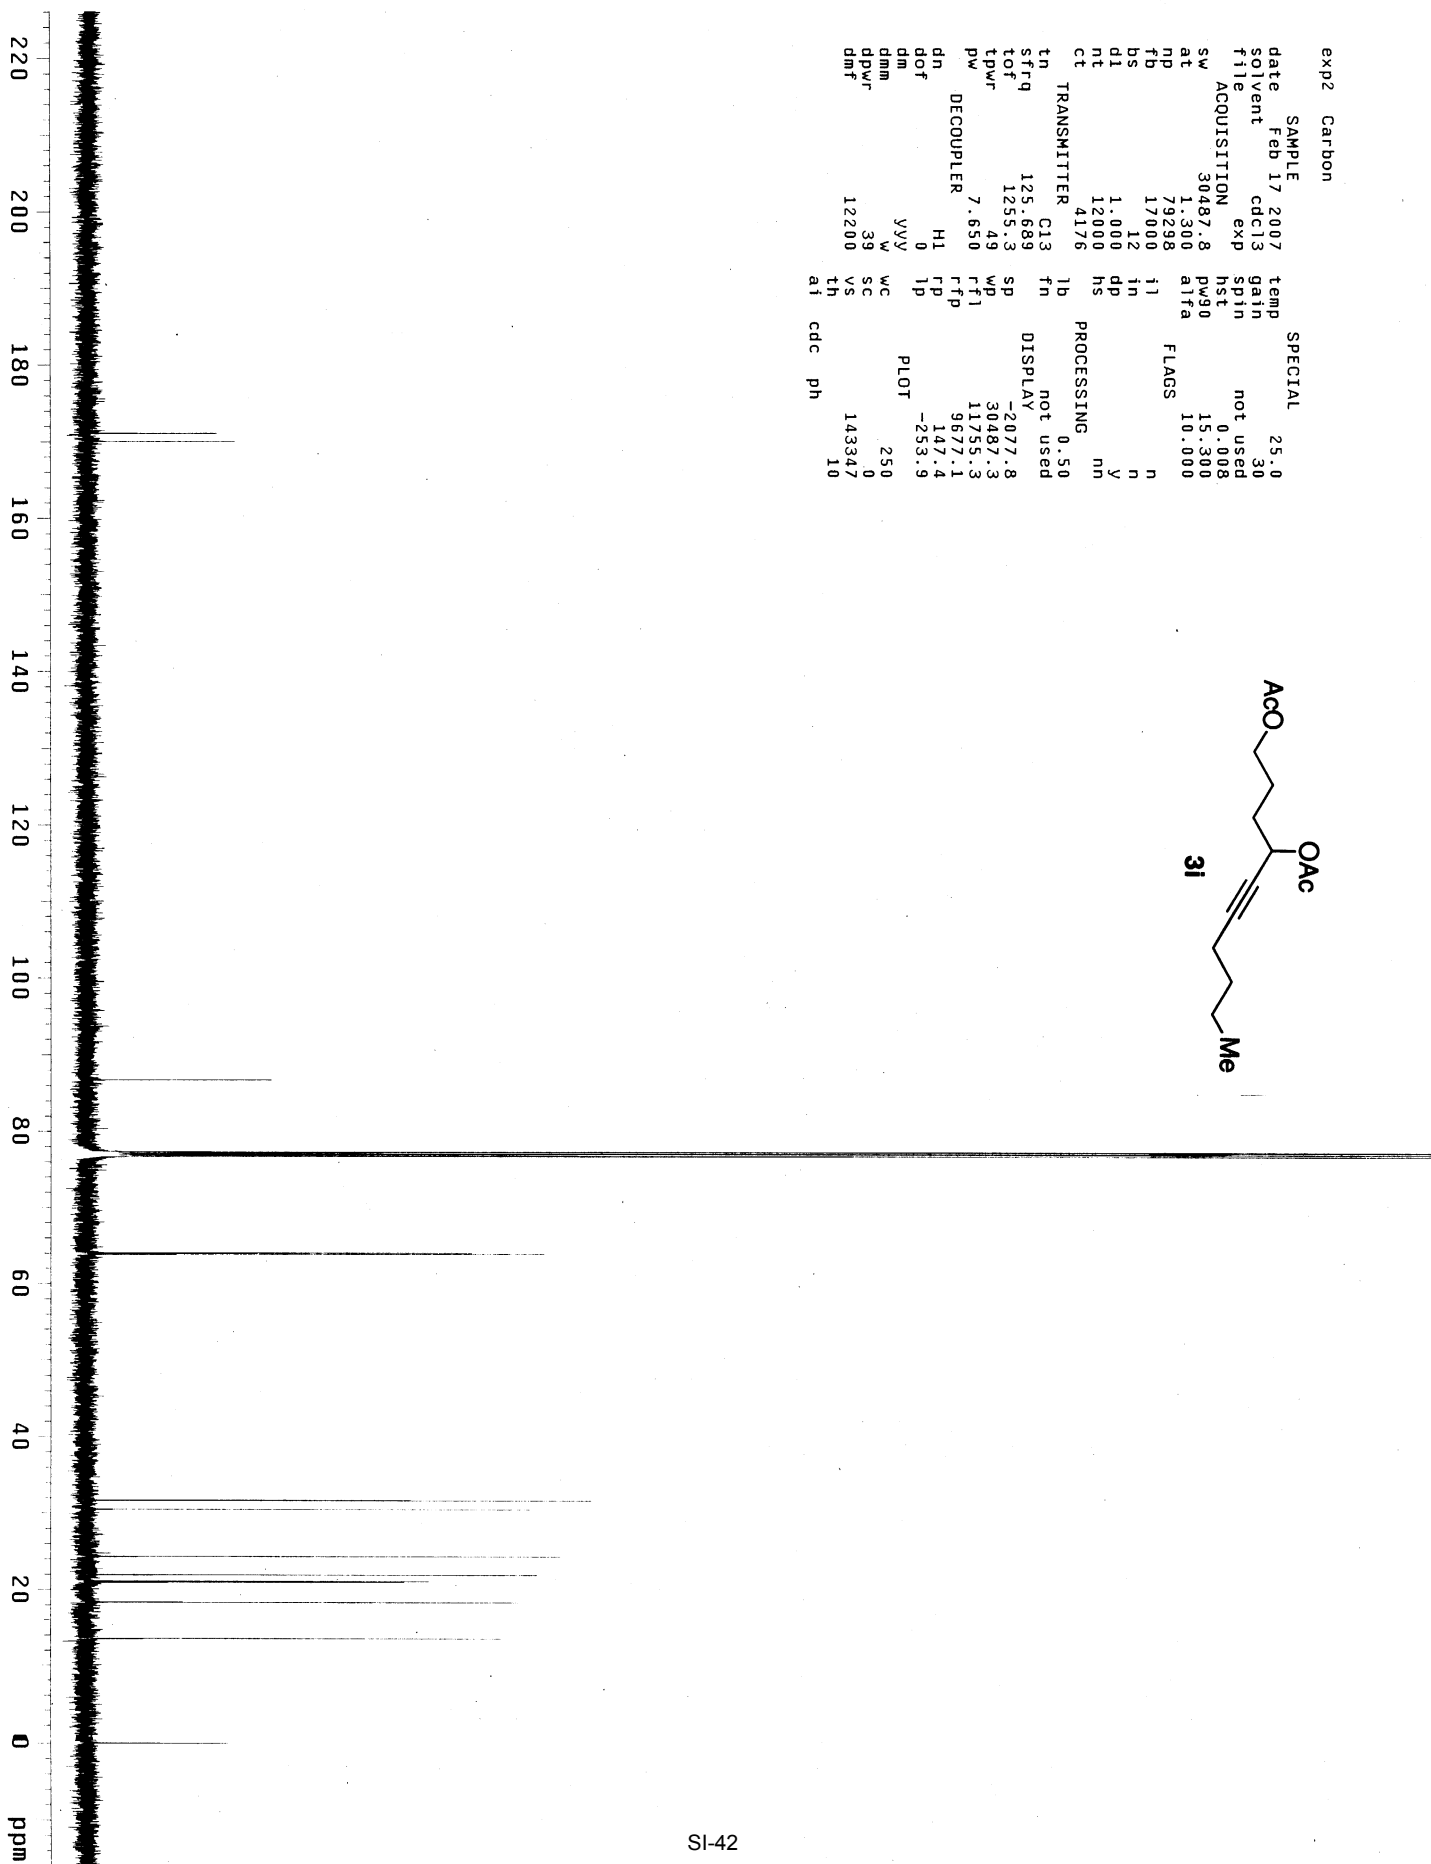

## STANDARD 1H OBSERVE - profile

expl Proton

| SAMPLE      |               | SPECIAL |          |
|-------------|---------------|---------|----------|
| date        | Jan 10 2007   | temp    | 25.0     |
| solvent     | cdcl3         | gain    | not used |
| file        | /home/wakup/~ | spin    | not used |
| data        | zhang/meng/im | hst     | 0.008    |
| ethy        | Crting_NIS_AC | pw90    | 14.700   |
| etone       | pure_C13.fid  | alpha   | 6.600    |
| ACQUISITION |               | FLAGS   |          |
| sw          | 8012.8        | il      | n        |
| at          | 2.049         | in      | n        |
| np          | 32830         | dp      | y        |
| fb          | 4000          | hs      | nn       |
| bs          | 32            | lb      | nn       |
| ss          | 2             | fn      | nn       |
| dl          | 1.000         | fn      | nn       |
| nt          | 8             | fn      | nn       |
| ct          | 8             | fn      | nn       |
| TRANSMITTER |               | DISPLAY |          |
| tn          | H1            | sp      | -512.0   |
| sfrq        | 499.809       | wp      | 4505.3   |
| tof         | 499.7         | rfl     | 1006.5   |
| tpwr        | 54            | rp      | -160.4   |
| pw          | 7.350         | lp      | -38.5    |
| DECOUPLER   |               | PLOT    |          |
| dn          | C13           | WC      | 250      |
| dof         | 0             | SC      | 0        |
| dm          | nn            | VS      | 150      |
| dmm         | C             | th      | 2        |
| dpwr        | 34            | ai      | cdc      |
| dmf         | 32258         | ph      |          |

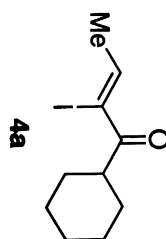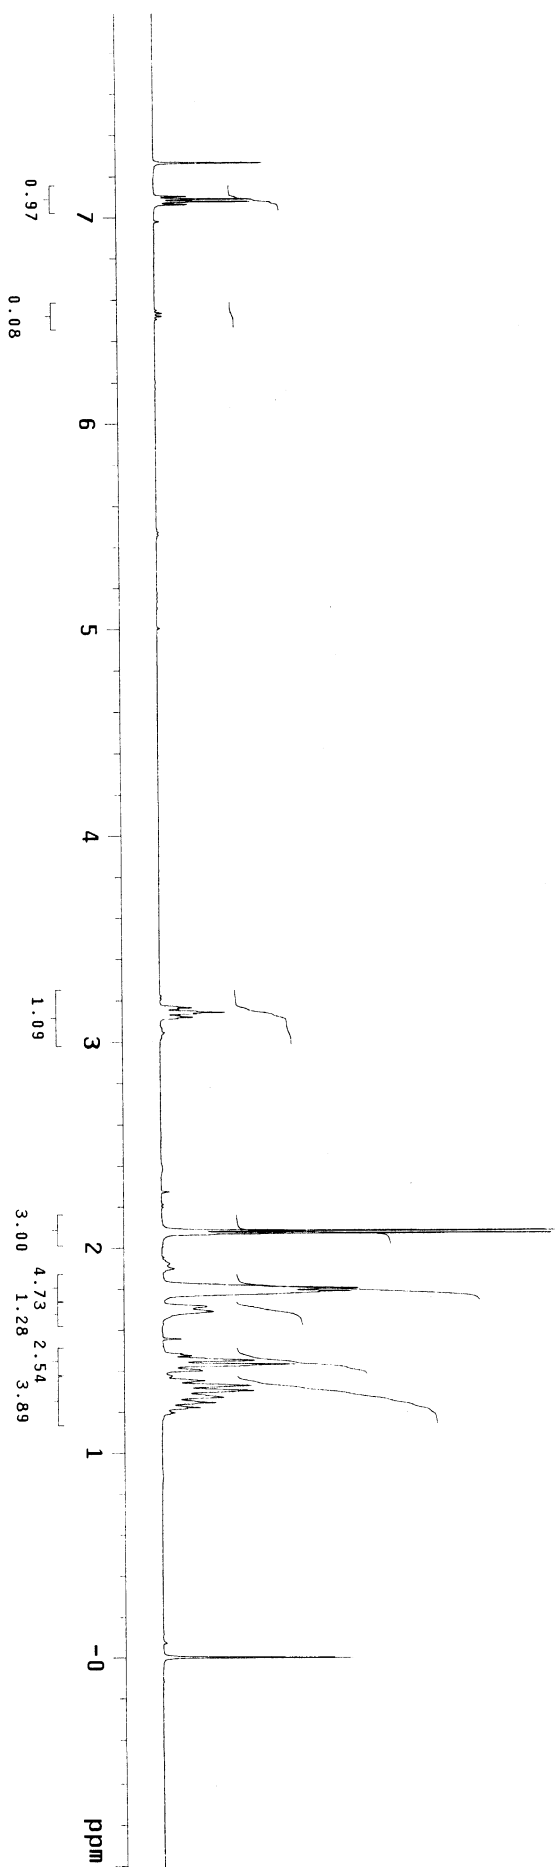

## STANDARD 1H OBSERVE - profile

expt Carbon

SAMPLE SPECIAL 25.0  
date Jan 10 2007 temp 30  
solvent cdc13 gain 30  
file /home/walkup/~ not used  
vnmrSYS/data/auto\_~ hst 0.008  
2007.01.10\_04/Aug.~ pw90 15.300  
05/data/cdc13\_01.f~ alfa 10.000

ACQUISITION  
id  
sw 30487.8  
at 1.300  
np 79298  
fb 17000  
bs 64  
d1 1.000  
nt 256  
ct 64

TRANSMITTER  
tn C13  
sfreq 125.689  
tof 1255.3  
tpwr 49  
pw 7.650

DECOUPLER  
dn H1  
dof 0  
dm YYY  
dmm W  
dpwr 39  
dmf 12200

PROCESSING  
hs  
lb 0.50  
fn not used

DISPLAY  
sp -2075.4  
wp 30487.3  
rf1 11754.0  
rfp 9678.1  
rp -138.3  
lp -228.6

PLOT  
wc 250  
sc 0  
vs 20000  
th 6  
ai cdc ph

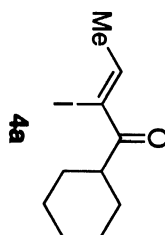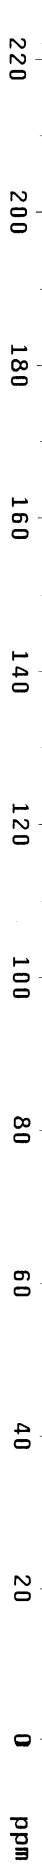

expt Proton

|                     |                |         |          |
|---------------------|----------------|---------|----------|
| SAMPLE              |                | SPECIAL |          |
| date                | Jan 18 2007    | temp    | 25.0     |
| solvent             | cdcl3          | gain    | 30       |
| file                | /home/vnmr1/n- | spin    | not used |
| mr400               | /waikup/data/~ | hsc     | 0.008    |
| Zhang/GuoZhu/H1-20~ |                | pw90    | 13.900   |
| 070118-57.fid       |                | alpha   | 6.600    |
| ACQUISITION         |                | FLAGS   |          |
| sw                  | 6410.3         | il      | n        |
| at                  | 2.049          | in      | n        |
| np                  | 26264          | dp      | v        |
| fb                  | 4000           | hs      | nn       |
| bs                  | 8              | ps      | nn       |
| dl                  | 1.000          | lb      | 0.20     |
| nt                  | 8              | fn      | 65536    |
| ct                  | 8              | fn      | 65536    |
| TRANSMITTER         |                | DISPLAY |          |
| tn                  | H1             | sp      | -508.8   |
| stfrq               | 399.782        | wp      | 4360.7   |
| tof                 | 399.5          | rfl     | 801.7    |
| tpwr                | 59             | rfd     | 0        |
| pw                  | 6.950          | lp      | 141.3    |
| DECOUPLER           |                | PLOT    |          |
| dn                  | C13            | wc      | 250      |
| dof                 | 0              | sc      | 0        |
| dm                  | nnn            | vs      | 2431     |
| dmm                 | c              | th      | 3        |
| dpwr                | 34             | at      | cdc ph   |
| dmf                 | 29412          |         |          |

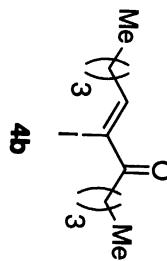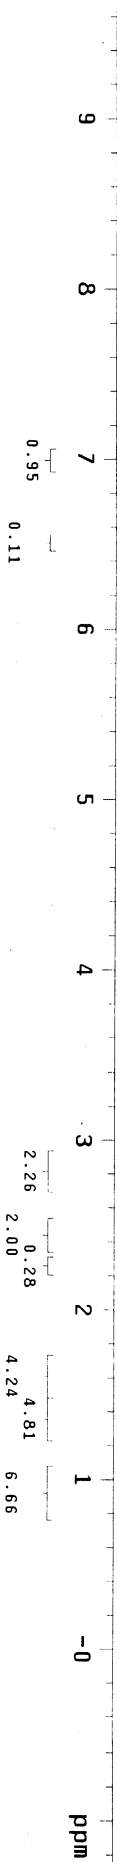

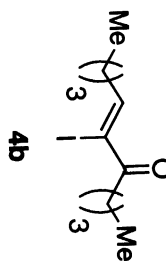

```

exp1 Carbon
SAMPLE
date Jan 18 2007 temp 25.0
solvent cdcl3 gain 30
file /home/vnmr1/n- spin not used
m500/waikup/data/~ nst 0.008
Zhang/Guozhu/C13-2~ pw90 15.500
0070118-59.fid alfa 10.000
ACQUISITION
sw 30487.8 f1 n
at 1.300 in n
np 79298 dp y
fb 17000 hs nn
bs 64
d1 1.000 lb not used
nt 1280 tn
ct 576 DISPLAY
TRANSMITTER
tn C13 sp -2078.7
sfrq 125.689 wf 30487.3
tof 1255.3 rfi 11756.2
tdwr 49 rfp 9677.1
pw 7.650 lp -109.7
DECOUPLER H1 PLOT -236.1
dn H1 WC 250
dof 0 SC 0
dm YVY VS 17864
dmm w th 9
dpwr 39 ai cdc ph
dmf 12200
  
```

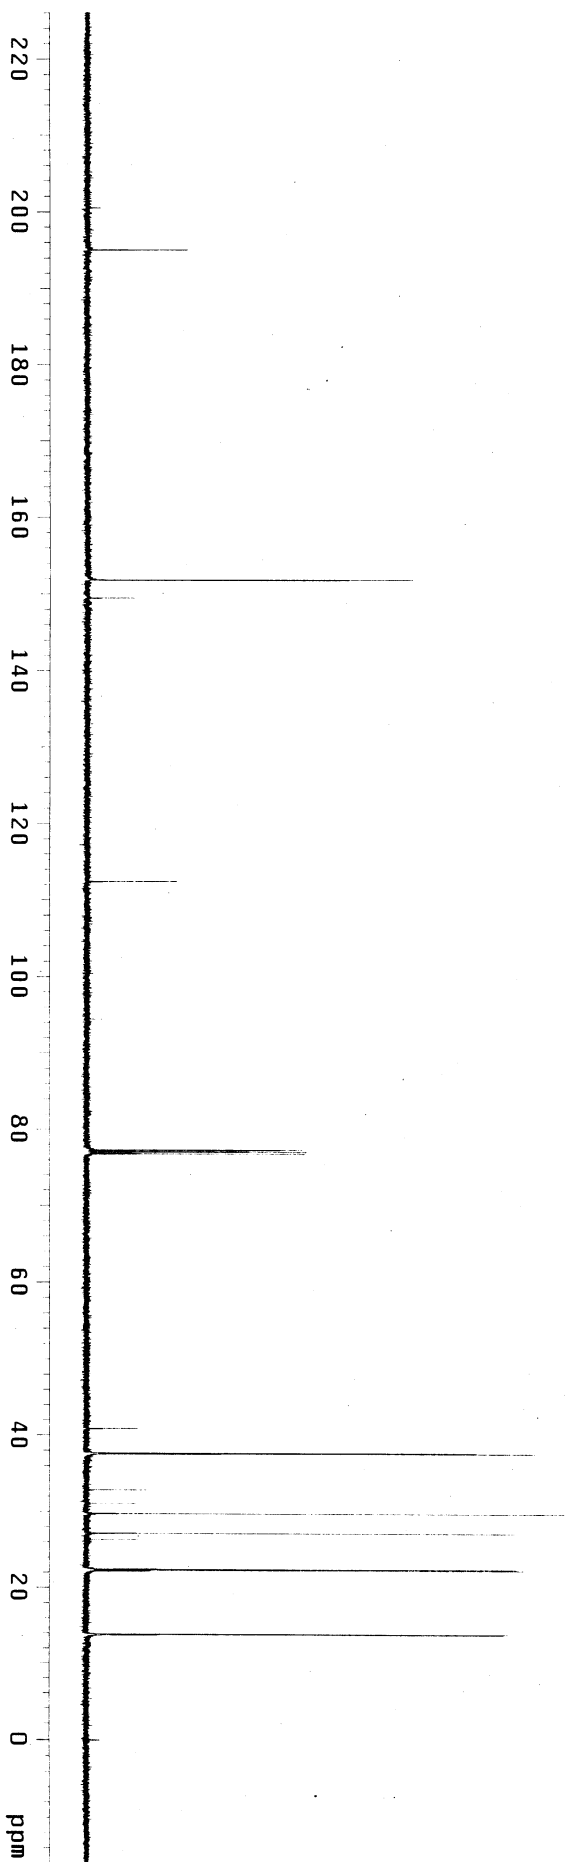

expi Proton

| SAMPLE              |                | SPECIAL |          |
|---------------------|----------------|---------|----------|
| date                | Jan 25 2007    | temp    | 25.0     |
| solvent             | cdcl3          | gain    | 30       |
| file                | /home/vnmr1/n- | spin    | not used |
| m500                | walnut/data/~  | hsc     | 0.008    |
| Zhang/GuoZhu/H1-20~ |                | pw90    | 14.700   |
| 070125-65.fid       | alpha          |         | 6.600    |
| ACQUISITION         |                | FLAGS   |          |
| sw                  | 8012.8         | f1      | n        |
| at                  | 2.049          | in      | n        |
| np                  | 32830          | dp      | y        |
| fb                  | 4000           | hs      | nn       |
| bs                  | 8              |         |          |
| dl                  | 1.000          | lb      | 0.20     |
| nt                  | 8              | fn      | 65536    |
| ct                  | 8              |         |          |
| TRANSMITTER         |                | DISPLAY |          |
| tn                  | H1             | sp      | -298.1   |
| sfrq                | 499.809        | wp      | 4921.0   |
| tof                 | 499.7          | rfl     | 1004.8   |
| tpwr                | 54             | rfp     | 57.5     |
| pw                  | 7.350          | lp      | -36.3    |
| DECOUPLER           |                | PLOT    |          |
| dn                  | C13            | wc      | 250      |
| dof                 | 0              | sc      | 0        |
| dmm                 | nnn            | vs      | 321      |
| dmm                 | c              | th      | 2        |
| dpwr                | 34             | ai      | cdc ph   |
| dmf                 | 32258          |         |          |

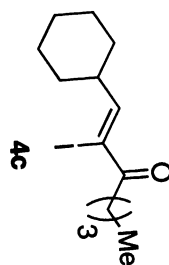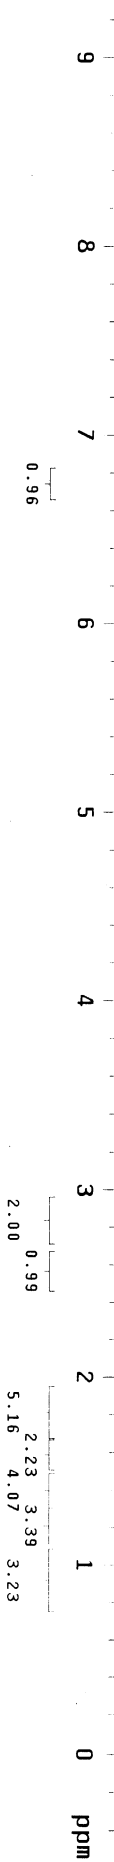

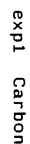



expl Proton

SAMPLE SPECIAL 25.0  
date Jan 22 2007 temp  
solvent Jan 22 2007 gain  
file /home/vnmr1/n- spin  
mr400/waikup/data/~ hst not used  
Zhang/Guozhu/H1-20~ pw90 0.008  
070122-63.fid alfa 13.500  
6.500  
ACQUISITION  
sw 6410.3 f1  
at 2.049 in n  
np 26264 dp y  
fb 4000 hs  
bs 32 lb  
dl 1.000 jb  
nt 8 fn  
ct 8  
TRANSMITTER  
tn H1 SP  
sfrq 399.782 rf1  
tof 399.5 rfi 4542.4  
tpwr 59 fp 805.4  
pw 6.950 lp 132.6  
DECOUPLER PLOT -27.4  
dh C13 WC 250  
dof 0 SC 0  
dm nn VS 46503  
dmm C th  
dpwr 34 ai  
dmf 29412 cdc ph 3

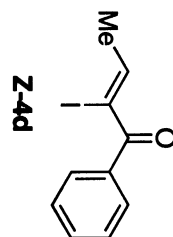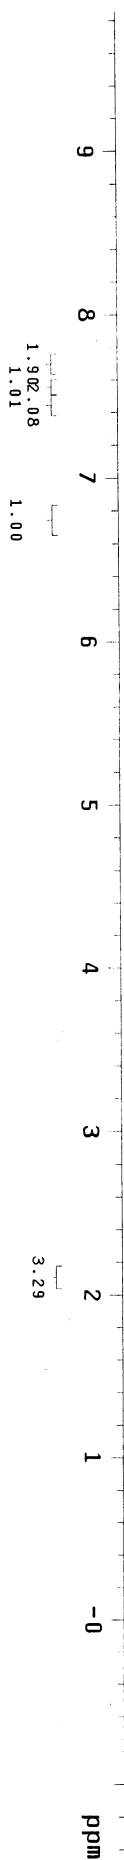

expt Carbon

SAMPLE

SPECIAL

25.0

date Jan 21 2007

solvent cdcl3

gain 30

file /home/vnmr1/n-

not used

mf500/walkup/data/~

hst 0.008

Zhang/Guozhu/C13-2-

pv90 15.300

0070121-63-2.fid

alpha 10.000

FLAGS

n

ACQUISITION

sw 30487.8

at 1.300

in n

np 79298

dp y

fb 17000

hs nn

bs 64

hs nn

d1 1.000

lb 0.50

nt 10240

fn not used

ct 1088

fn not used

sp -2076.4

wp 30487.3

rf1 11753.9

rfp 9677.1

rfp -66.0

lp -302.4

pl 250

sc 0

vs 58899

th 7

at cdc

ph

dmf 12200

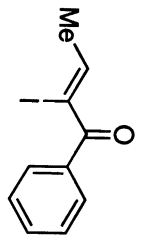

Z-4d

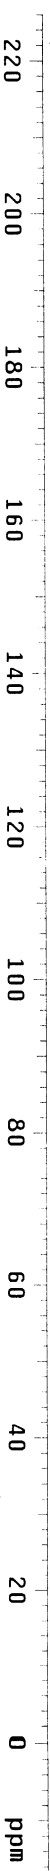

expi Proton

SAMPLE SPECIAL 25.0  
date Jan 22 2007 temp 20  
solvent cdc13 gain 20  
file /home/vnmr1/n- not used  
mr400/waikup/data/~ hsc 0.008  
Zhang/GuoZhu/H1-20~ pw90 13.900  
070122-62.fid alfa 6.600  
ACQUISITION  
SW 6410.3 f1 n  
at 2.049 in n  
np 26264 dp y  
fb 4000 hs nn  
bs 32 lb  
dl 1.000 fn  
nt 8  
ct TRANSMITTER SP DISPLAY  
tn H1 -412.2  
sfrq 399.782 rfi 3987.2  
tof 399.5 rfp 806.0  
tpwr 59 rp 133.7  
pw 6.950 lp -24.3  
DECOUPLER PLOT  
dn C13 WC 250  
dof 0 SC 0  
dm nn VS 72251  
dmm C th  
dpwr 34 ai cdc ph 2  
dmf 29412

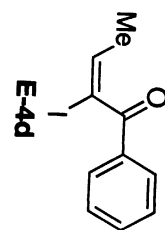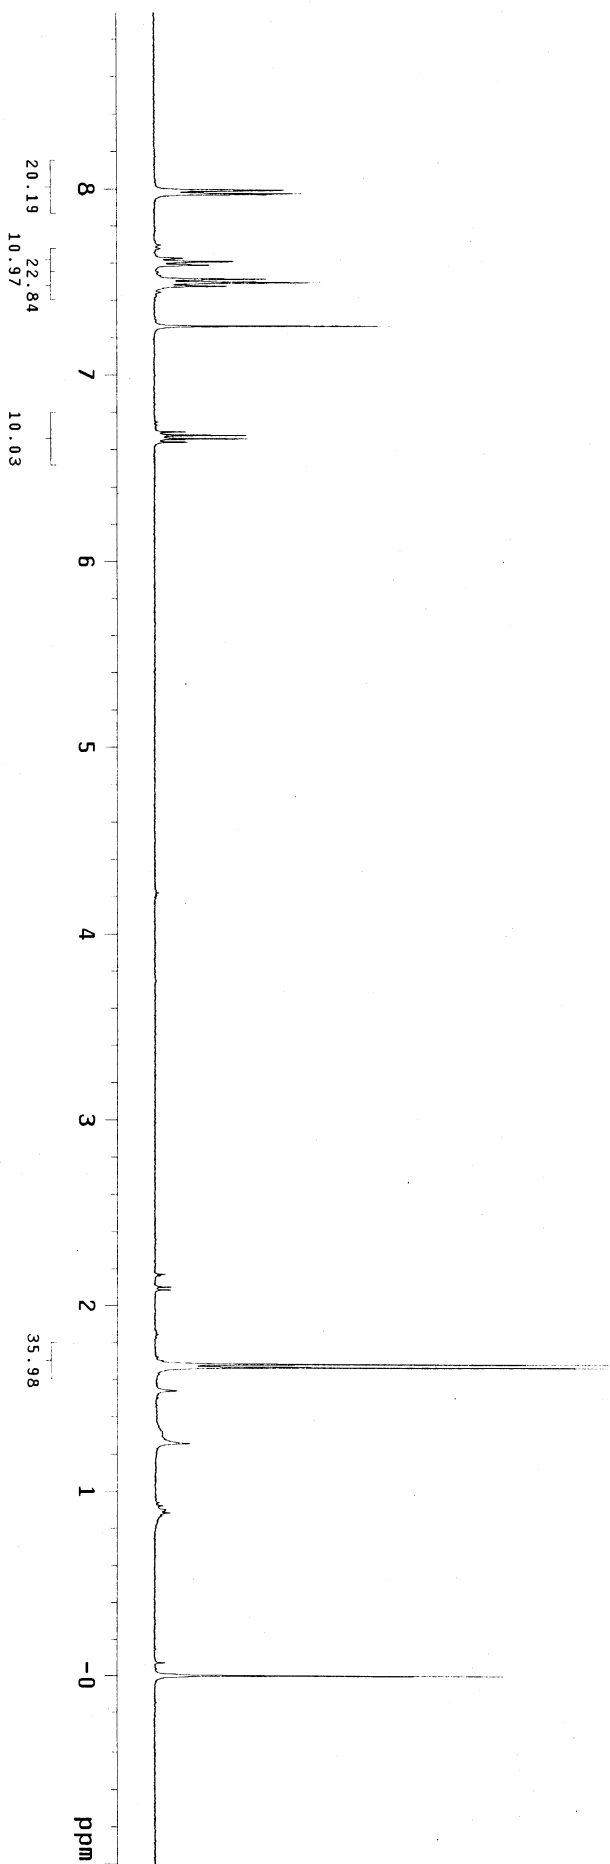

exp2 Carbon

| SAMPLE      |             | SPECIAL    |          |
|-------------|-------------|------------|----------|
| date        | Feb 17 2007 | temp       | 25.0     |
| solvent     | cdc13       | gain       | 30       |
| file        | cdc13       | spin       | not used |
| ACQUISITION |             | nst        | 0.008    |
| sw          | 30487.8     | pw90       | 15.300   |
| at          | 1.300       | alfa       | 10.000   |
| np          | 79298       | FLAGS      |          |
| fb          | 17000       | i1         | n        |
| bs          | 64          | in         | n        |
| d1          | 1.000       | dp         | y        |
| nt          | 24000       | hs         | nn       |
| ct          | 896         | PROCESSING |          |
| tn          | TRANSMITTER | lb         | 0.50     |
| stfrq       | 125.689     | fn         | not used |
| tofr        | 1255.3      | sp         | DISPLAY  |
| tdwr        | 49          | wp         | -2078.2  |
| pw          | 7.650       | rfl        | 30487.3  |
| DECOUPLER   |             | rfd        | 11755.8  |
| dn          | H1          | rp         | 9677.1   |
| dof         | 0           | lp         | 141.5    |
| dm          | yyy         | PLOT       |          |
| dmm         | w           | wc         | -236.9   |
| dpwr        | 39          | sc         | 250      |
| dnt         | 12200       | vs         | 0        |
| th          |             | ai         | 52598    |
| ai          | cdc         | ph         | 5        |

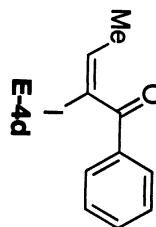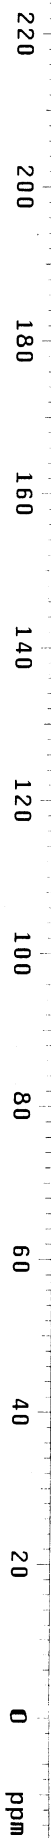

expl Proton

SAMPLE date Jan 28 2007 temp 25.0  
SOLVENT cdc13 gain 30  
FILE /home/vnmr1/nr spin not used  
MR 500/waikup/data/~ hst 0.008  
Zhang/Guozhu/H1-20~ pw90 14.700  
070128-68-lower.f1~ alfa 6.600

ACQUISITION d  
SW 8012.8 f1  
AT 2.049 in  
NP 32830 dp  
FB 4000 hs  
BS 8 lb  
D1 1.000 fn  
NT 8  
CT 8  
TRANSMITTER H1  
TN 499.809 wp  
STFQ 499.7 rfi  
TOF 54 rfp  
TPWR 7.350 lp  
PW DECOUPLER C13  
DN 0 WC  
DOF 0 VS  
DM 0 TH  
DMM 34  
DPWR 34  
DMF 32258

PROCESSING  
0.20  
65536  
DISPLAY  
-678.8  
6094.5  
1007.0  
-68.7  
-33.5  
PLOT  
250  
0  
421  
2

FLAGS  
n  
v  
nn  
nn

cds ph

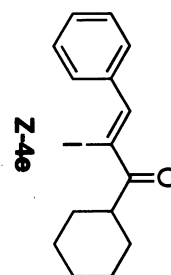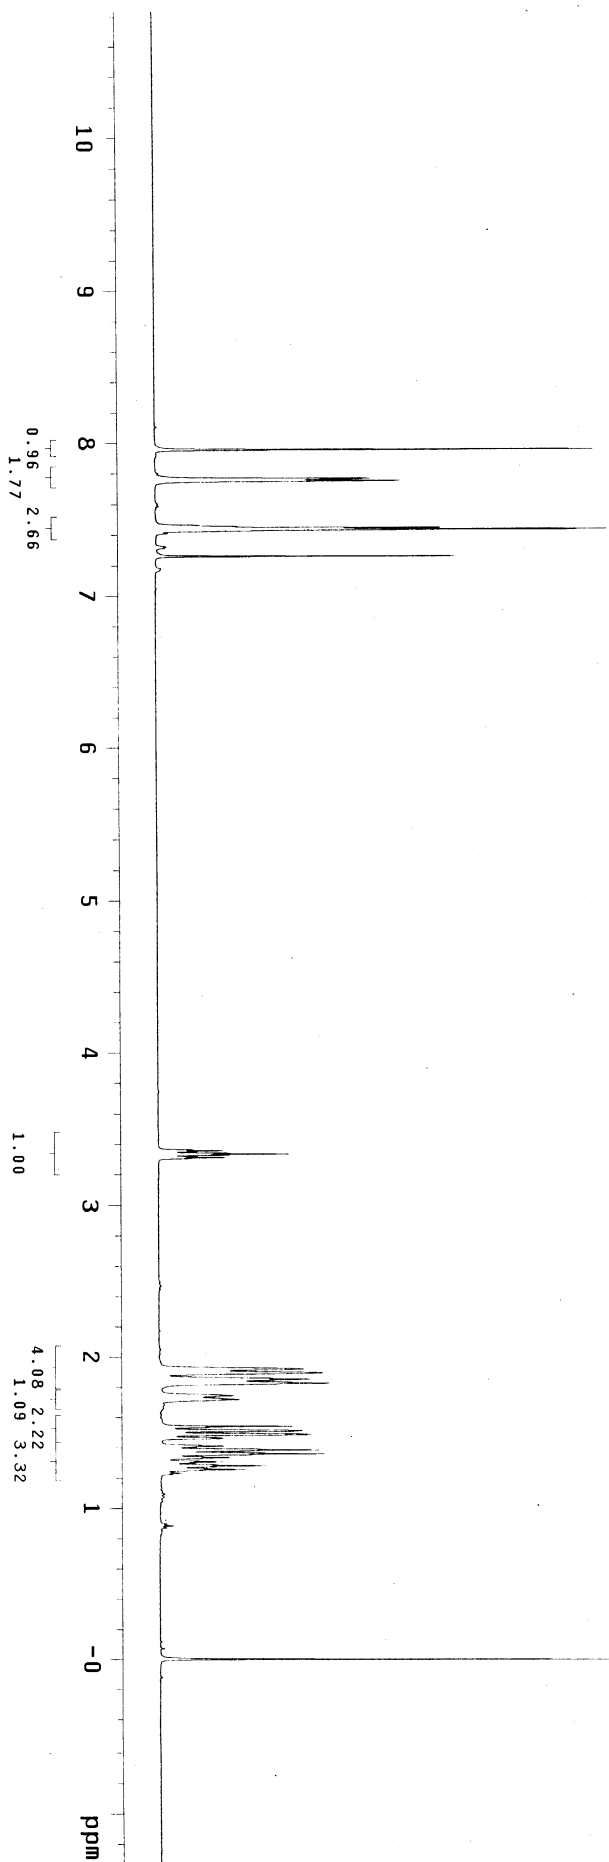

expi Carbon

SAMPLE SPECIAL 25.0  
date Jan 28 2007 temp 25.0  
solvent cdcl3 gain 30  
file /mnt/nmr500/w\* spin not used  
akup/data/2hang/G- hst 0.008  
uoznu/C13-20070128- pw90 15.300  
-68-lower.fid alfa 10.000  
ACQUISITION  
sw 30487.8 f1 n  
at 1.300 in n  
np 79298 dp y  
fb 17000 hs nn  
bs 16  
dl 1.000 lb  
nl 12000 fn  
ct 384  
TRANSMITTER  
tn C13 sp -2076.8  
sfrq 125.689 wf 30487.3  
tof 1255.3 rfi 11754.4  
tpwr 49 rfp 9677.1  
pw 7.650 lp -0.5  
DECOUPLER H1 PLOT -282.3  
dn H1 WC 250  
dof 0 SC 0  
dm YYY VS 30039  
dmm w th  
dpwr 39 at cdc ph 3  
dmf 12200

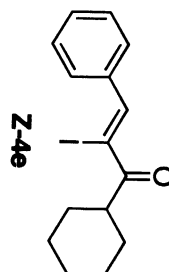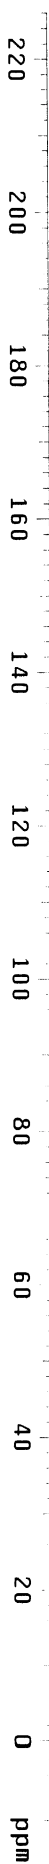

expl Proton

| SAMPLE        |                | SPECIAL    |          |
|---------------|----------------|------------|----------|
| date          | Jan 28 2007    | temp       | 25.0     |
| solvent       | cdcl3          | gain       | 30       |
| file          | /home/vnmr1/n~ | spin       | not used |
| mr500         | /walkup/data/~ | hst        | 0.008    |
| Zhang         | /Guozhu/H1-20~ | pw90       | 14.700   |
| 070128-68.fid | alfa           | 6.600      |          |
| ACQUISITION   |                | FLAGS      |          |
| sw            | 8012.8         | il         | n        |
| at            | 2.049          | in         | n        |
| np            | 32830          | dp         | y        |
| fb            | 4000           | hs         | nn       |
| bs            | 8              | PROCESSING |          |
| d1            | 1.000          | lb         | 0.20     |
| nt            | 8              | fn         | 65536    |
| ct            | 8              | DISPLAY    |          |
| TRANSMITTER   |                | sp         | -603.0   |
| tn            | H1             | wd         | 5236.4   |
| sfrq          | 499.809        | rfl        | 1007.0   |
| tof           | 499.7          | rfl        | 0        |
| tpwr          | 54             | rp         | -74.1    |
| pw            | 7.350          | tp         | -35.4    |
| DECOUPLER     |                | PLOT       |          |
| dn            | C13            | wc         | 250      |
| dof           | 0              | sc         | 0        |
| dm            | nnn            | vs         | 370      |
| dmm           | c              | th         | 2        |
| dpwr          | 34             | at         |          |
| dmf           | 32258          | cdc        | ph       |

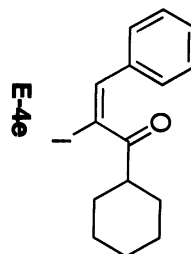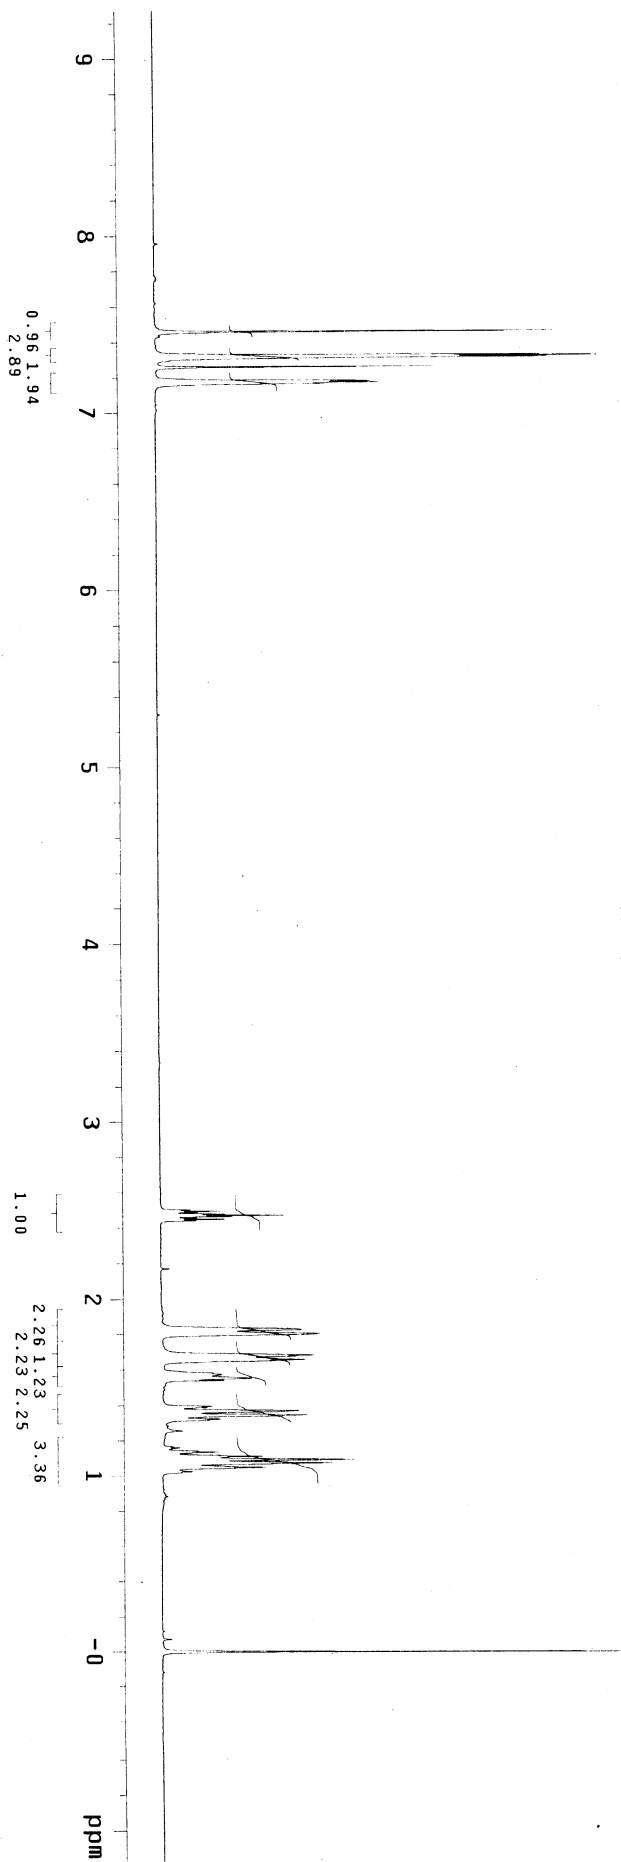

expl Carbon

SPECIAL

date Jan 28 2007 temp 25.0  
solvent cdc13 gain 30  
file /home/vnmr1/n- not used  
mr500/walakup/data/~ hst 0.008  
Zhang/Guozhu/C13-2~ pw90 15.300  
0070128-68-upper.f~ alfa 10.000

E-4e

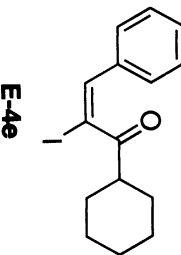

ACQUISITION

id il in n

FLAGS

n

sw 30487.8 in n

at 1.300 dp y

np 79298 hs nn

fb 17000 bs

bs 16 lb not used

d1 1.000 fn

nt 12220

ct 1360

tn TRANSMITTER

sfreq C13

tofr 125.689 rfp

tpwr 1255.3

pw 7.650

DECOUPLER

dn H1

dof 0

dm YVY

dmm w

dpwr ai

dmf 12200

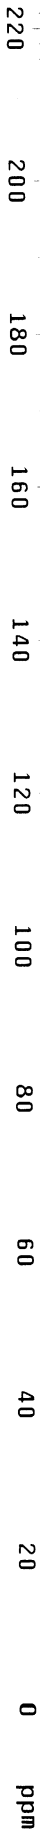



expl Proton

SPECIAL

date Feb 8 2007 temp 25.0  
solvent cdcl3 gain 30  
file /home/vnmr1/n~ not used  
mr400/walakup/data/~ hst 0.008  
Zhang/Guozhu/H1-20~ pw90 13.900  
070208-81\_lower-2.~ alfa 6.600

fid flags

ACQUISITION

sw 6410.3 in n  
at 2.049 dp v  
np 26264 hs nn  
fb 4000  
bs 8 lb 0.20  
d1 1.000 fn 65536  
nt 24  
ct 24  
TRANSMITTER H1  
tn 399.782 rfi -465.6  
sfreq 399.5 rfp 4457.5  
tof 399.5 tp 804.8  
tpwr 39 ip 4.2  
pw 6.950 plot -29.3  
DECOUPLER WC 250  
dn C13 SC 0  
dof 0 VS 17371  
dm nn th 2  
dmm c ai cdc ph  
dpwr 34  
dmf 29412

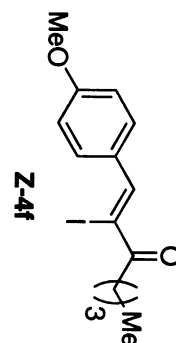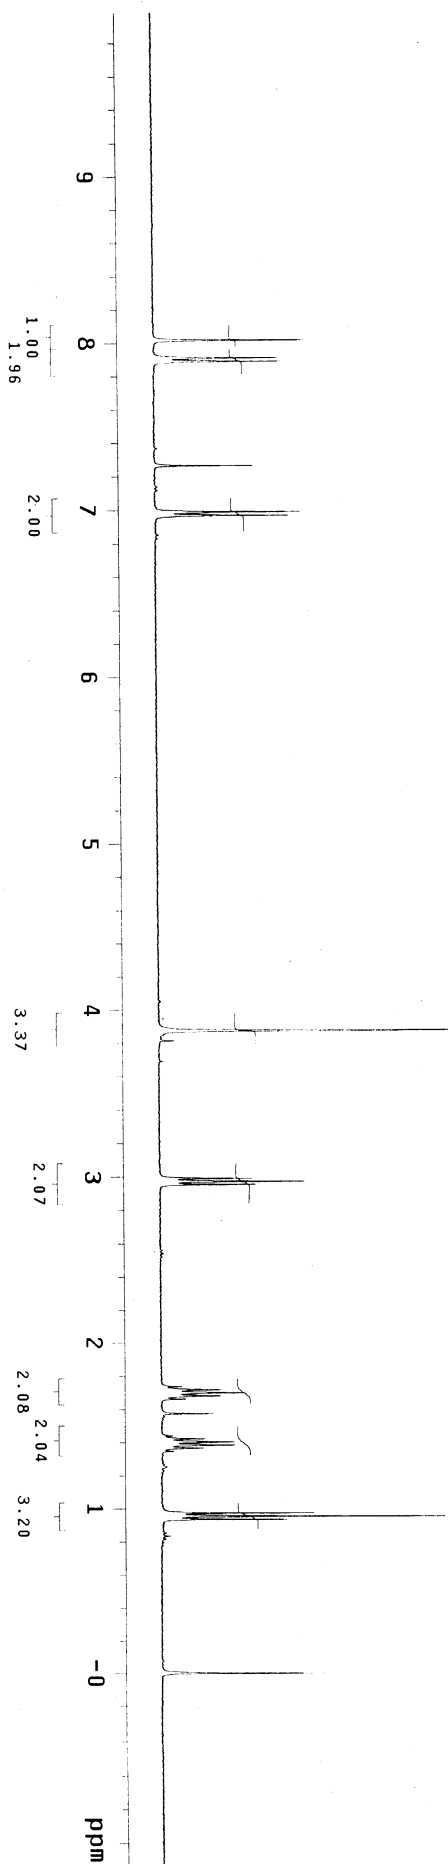

expl Carbon

SAMPLE SPECIAL 25.0  
date Feb 13 2007 temp 30  
solvent cdc13 gain 30  
f1le /home/walkup/~ not used  
nmr500/walkup/data nst 0.008  
/Zhang/Guozhu/C13-~ pw90 15.500  
20070213-81-lower.~ alfa 10.000

ACQUISITION  
f1d  
sw 30487.8 i1 n  
at 1.300 in y  
np 79298 hs n  
fb 17000  
bs 12 fn  
d1 1.000 not used  
nt 12000  
ct 924 DISPLAY  
tn TRANSMITTER 924 SP -2076.8  
sfq C13 wp 30487.3  
tof 125.689 rfi 11754.4  
tpwr 1255.3 rfp 9677.1  
pw 7.650 lp -82.3  
DECOUPLER PLOT -289.8  
dn H1 WC 250  
dof 0 SC 0  
dm 0 VS 23464  
dmm YYY th  
dpwr w ai cdc ph 6  
dmf 12200

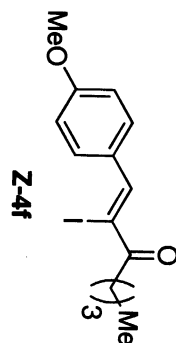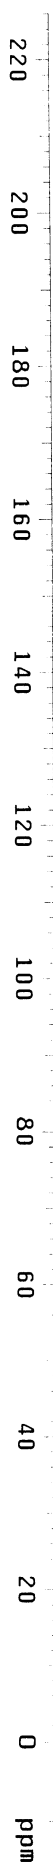

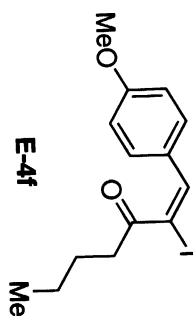

```

expt  proton
SAMPLE
date    Feb 12 2007
solvent  cdcl3
file    /home/vnmr1/n~
mr400/walkup/data/~
Zhang/Guozhu/H1-20~
070212-81-upper.fi~
SPECIAL
temp    25.0
gain    30
spin    not used
nst     0.008
pw90    13.900
alfa    6.500
ACQUISITION
d       1
f1      n
in      y
dp      nm
hs      0.20
PROCESSING
0.20
nm
65536
DISPLAY
-564.0
4461.6
806.4
25.2
-19.7
PLOT
250
0
1771
2
DECOUPLER
WC
SC
VS
TH
AI
CDC
PH
DMF
29412

```

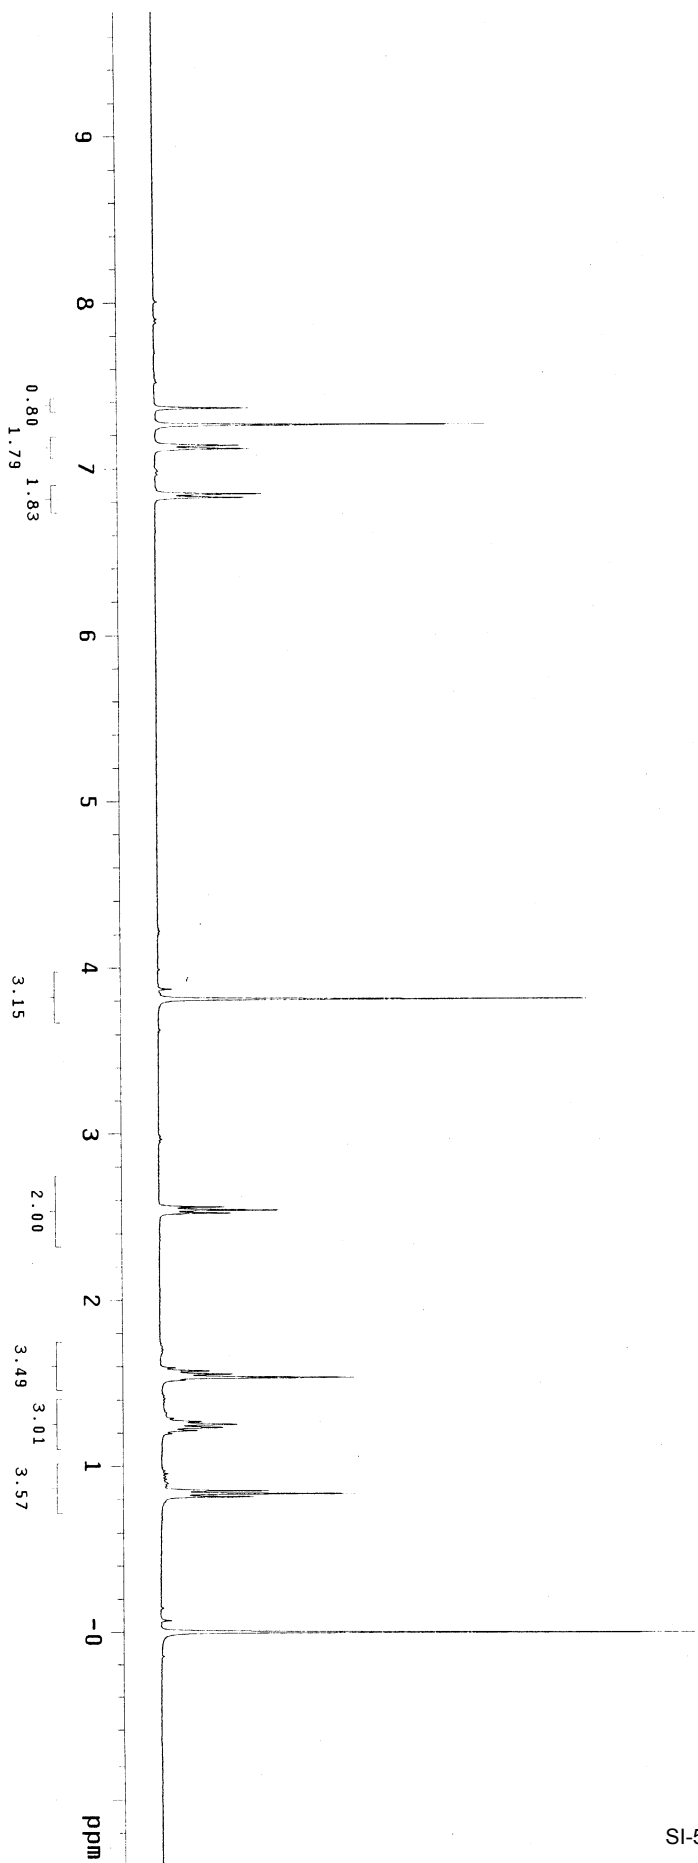

| SAMPLE      |             |       |          |      |  | SPECIAL    |  |  |  |  |  |
|-------------|-------------|-------|----------|------|--|------------|--|--|--|--|--|
| date        | Feb 17 2007 | temp  | 25.0     |      |  |            |  |  |  |  |  |
| solvent     | cddc13      | gain  | 30       |      |  |            |  |  |  |  |  |
| file        | exp         | spin  | not used |      |  |            |  |  |  |  |  |
| ACQUISITION |             |       |          |      |  |            |  |  |  |  |  |
| sw          | 30487.8     | pw90  | 0.008    |      |  |            |  |  |  |  |  |
| at          | 1.300       | alfta | 15.300   |      |  |            |  |  |  |  |  |
| np          | 79298       |       | 10.000   |      |  |            |  |  |  |  |  |
| fb          | 17000       | i1    | n        |      |  |            |  |  |  |  |  |
| bs          | 64          | in    | n        |      |  |            |  |  |  |  |  |
| di          | 1.000       | dp    | y        |      |  |            |  |  |  |  |  |
| nt          | 24000       | hs    | nm       |      |  |            |  |  |  |  |  |
| ct          | 15936       |       |          |      |  |            |  |  |  |  |  |
| TRANSMITTER |             |       |          |      |  | PROCESSING |  |  |  |  |  |
| tn          | C13         | lb    | f1       | 0.50 |  |            |  |  |  |  |  |
| sfrq        | 125.689     |       | not used |      |  |            |  |  |  |  |  |
| tof         | 1255.3      | wd    | -2077.8  |      |  |            |  |  |  |  |  |
| tpwr        | 49          | sp    | 30487.3  |      |  |            |  |  |  |  |  |
| pw          | 7.650       | rfl   | 11755.3  |      |  |            |  |  |  |  |  |
| DECOUPLER   |             |       |          |      |  |            |  |  |  |  |  |
| tn          | H1          | r1p   | 9677.1   |      |  |            |  |  |  |  |  |
| dof         | 0           | lp    | 141.5    |      |  |            |  |  |  |  |  |
| dm          | yyy         |       | -236.9   |      |  |            |  |  |  |  |  |
| dmm         |             | wc    | PLOT     |      |  |            |  |  |  |  |  |
| dppr        | 39          | sc    | 250      |      |  |            |  |  |  |  |  |
| dmf         | 12200       | vs    | 0        |      |  |            |  |  |  |  |  |
|             |             | th    | 149652   |      |  |            |  |  |  |  |  |
|             |             | ai    | .5       |      |  |            |  |  |  |  |  |
|             |             | cdc   | ph       |      |  |            |  |  |  |  |  |

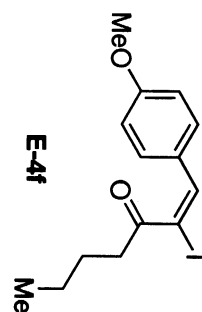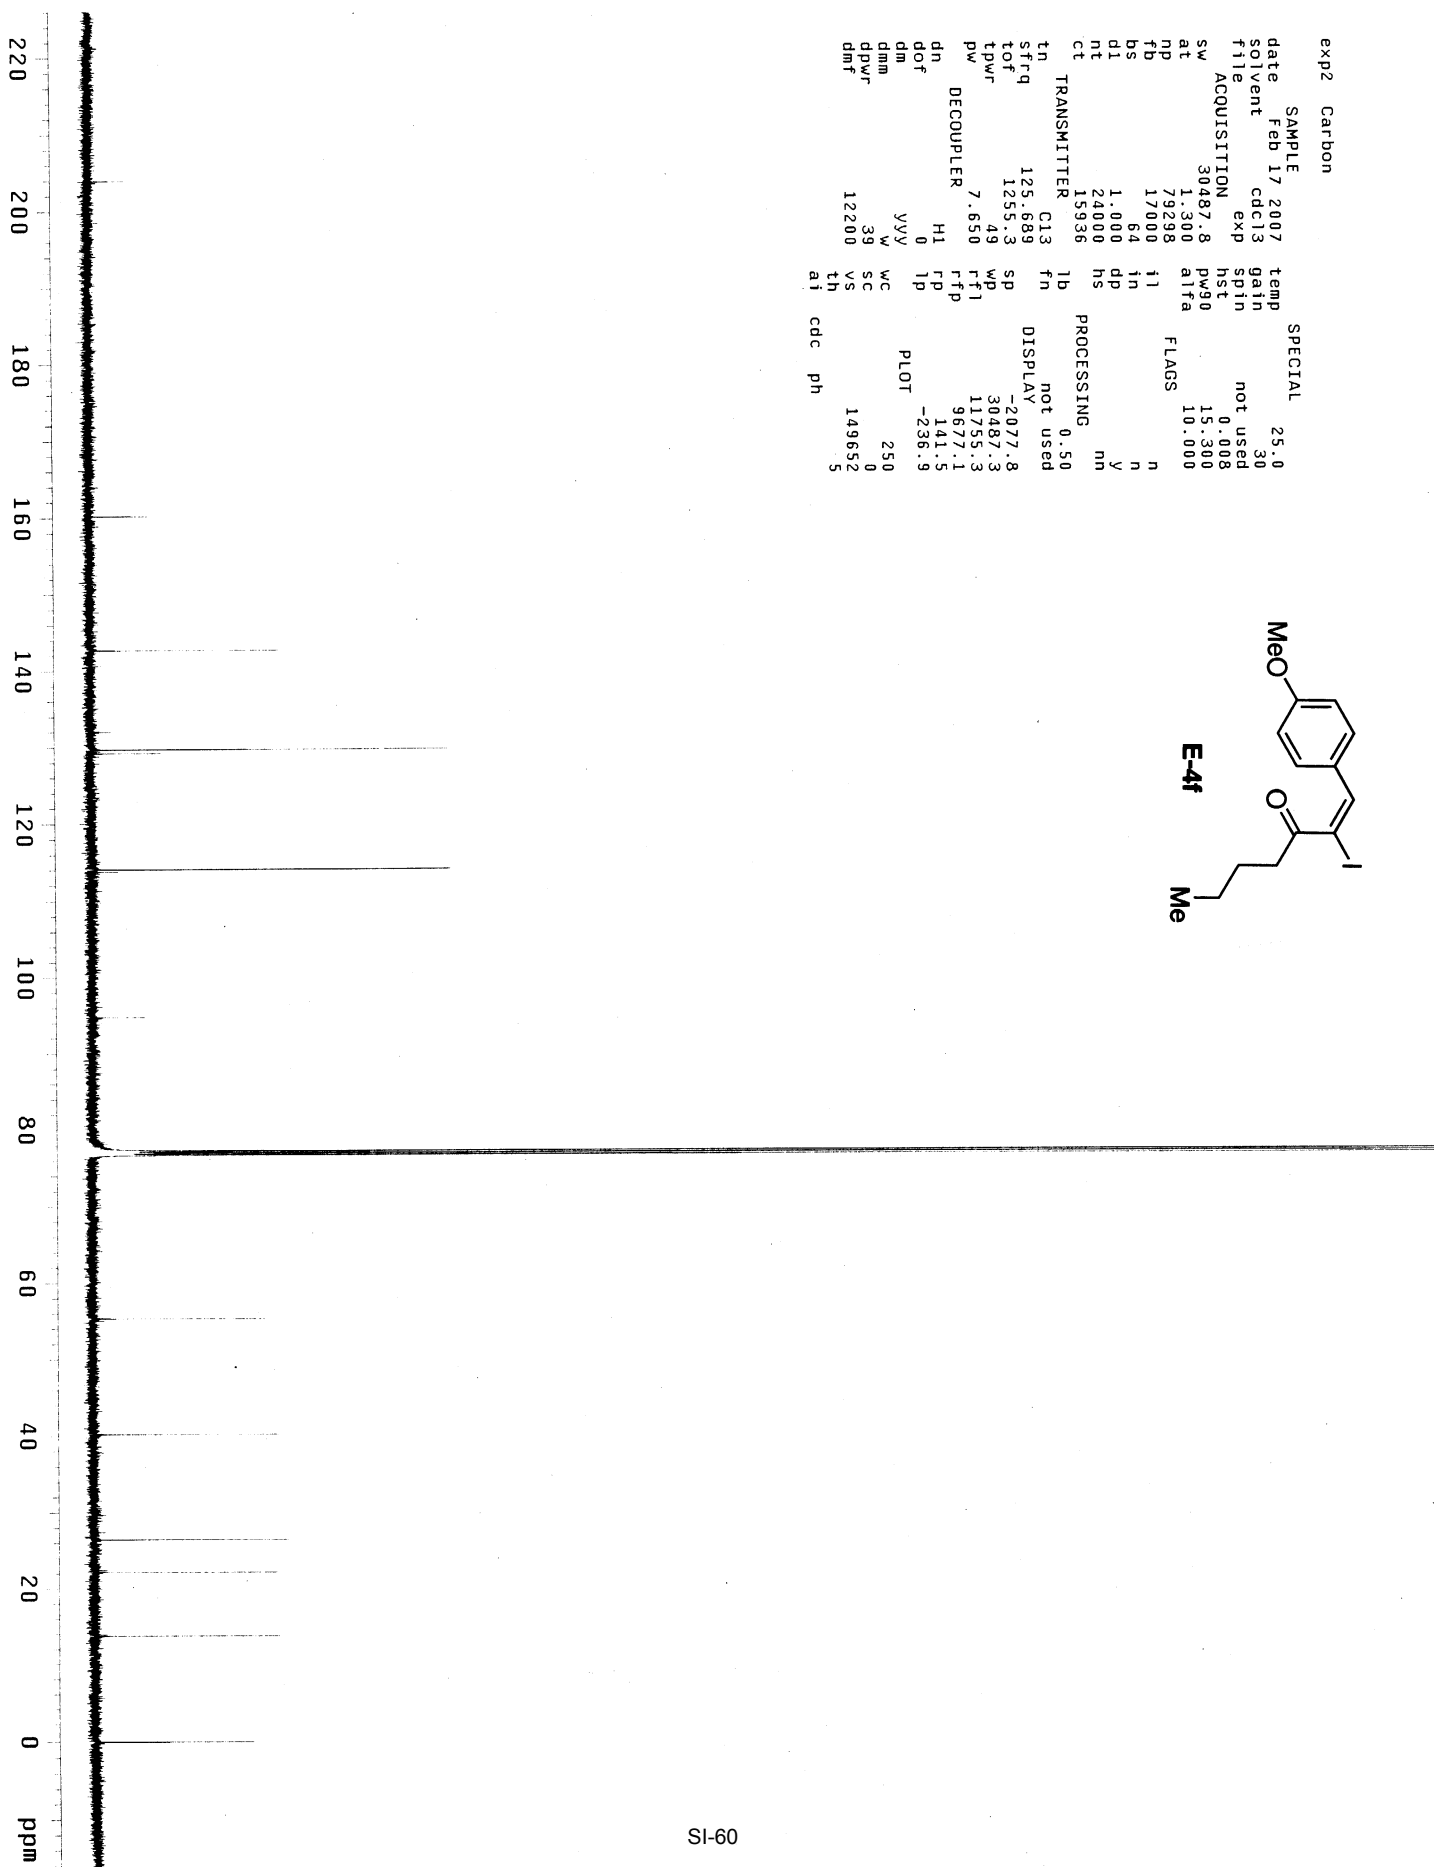

STANDARD 1H OBSERVE - profile

Automation directory: /home/walkup/vnmrsvs/data/auto\_2007.02.09\_19  
 File: s\_20070209\_003/data/cdc13\_01.fid  
 Sample id: s\_20070209\_003

Pulse Sequence: szpul

Solvent: cdcl3  
 Temp: 25.0 C / 298.1 K  
 Operator: walkup  
 File: cdc13\_01  
 VNMR-400 "NMR400"

Relax. delay 1.000 sec  
 Pulse 45.0 degrees  
 Acq. time 2.049 sec  
 Width 6410.3 Hz  
 8 repetitions

OBSERVE H1, 399.7793051 MHz  
 DATA PROCESSING  
 Line broadening 0.2 Hz  
 FT size 65536  
 Total time 0 min, 30 sec

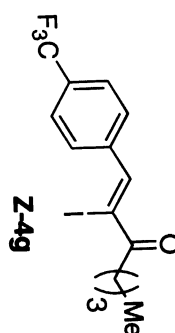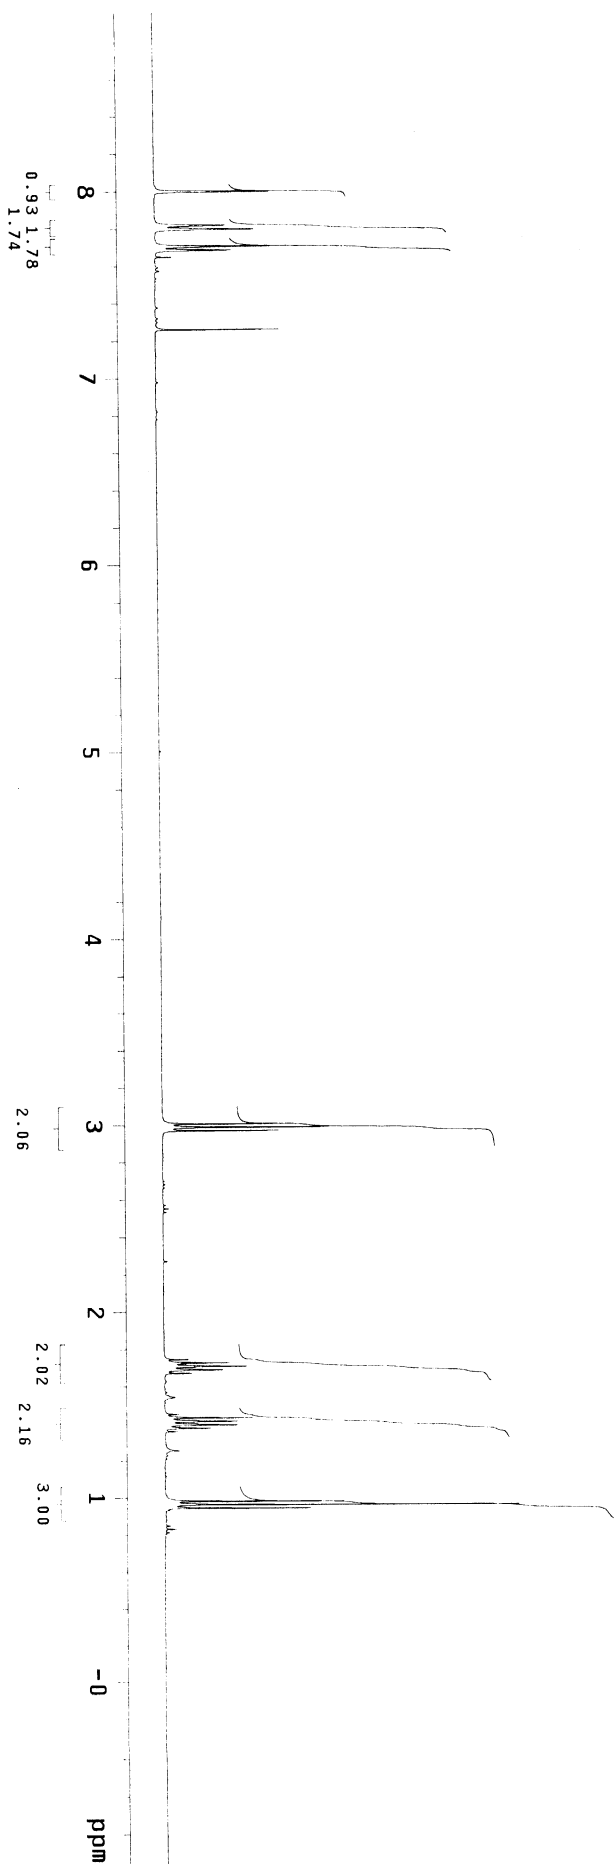

## STANDARD 1H OBSERVE - profile

exp2 Carbon

SAMPLE SPECIAL 25.0  
date Feb 10 2007 temp 30  
solvent cdc13 gain 30  
file /home/walakup/~ not used  
vnmr/svs/data/auto\_~ hst 0.008  
2007.02.10\_04/Aug.~ pw90 15.300  
04/data/cdc13\_01.f~ alfa 10.000

ACQUISITION  
id i1 n  
sw 30487.8 in y  
at 1.300 dp y  
np 79298 hs nm  
fb 17000  
bs 32 lb 0.50  
d1 1.000 fn not used  
nt 12800  
ct 288  
TRANSMITTER C13  
in wp -2078.2  
sfreq 125.689 rfi 30487.3  
tot 1255.3 rfp 11755.8  
tpwr 49 tp -37.6  
pw 7.650 lp -231.6

DECOUPLER WC 250  
dn H1 SC 0  
dof 0 VS 30326  
dm YVY th 3  
dmm w ai cdc ph  
dpwr 39  
dmf 12200

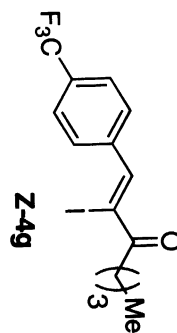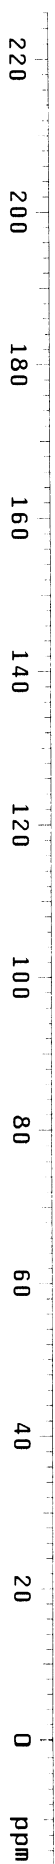

exp1 Proton

| SAMPLE              |                 | SPECIAL    |          |
|---------------------|-----------------|------------|----------|
| date                | Feb 12 2007     | temp       | 25.0     |
| solvent             | cdcl3           | gain       | not used |
| file                | /home/waikup/~  | spin       | not used |
| nmr                 | sys/data/auto_~ | hst        | 0.008    |
| 2007.02.12_22/s_20~ |                 | pw90       | 13.900   |
| 070212_001/data/cd~ |                 | alfa       | 6.600    |
| c13.02.fid          |                 | flags      |          |
| ACQUISITION         |                 | i1         | n        |
| sw                  | 6410.3          | in         | y        |
| at                  | 2.049           | dp         | nm       |
| np                  | 26264           | hs         |          |
| fb                  | 4000            | PROCESSING | 0.20     |
| bs                  | 32              | lb         | 65536    |
| ss                  | 2               | fn         |          |
| di                  | 1.000           | DISPLAY    | -404.6   |
| nt                  | 8               | sp         | 3595.0   |
| ct                  | 8               | wd         | 805.8    |
| TRANSMITTER         | H1              | rfl        | 0        |
| tn                  | 399.782         | rfp        | 119.0    |
| strq                | 399.5           | tp         | -23.8    |
| tof                 | 59              | PLOT       | 250      |
| tpwr                | 6.950           | WC         | 0        |
| pw                  |                 | SC         | 80       |
| DECOUPLER           | C13             | VS         | 2        |
| dn                  | 0               | th         |          |
| dof                 | nnn             | ai         | cdc ph   |
| dm                  | 34              |            |          |
| dmm                 | 34              |            |          |
| dpwr                | 29412           |            |          |
| dmf                 |                 |            |          |

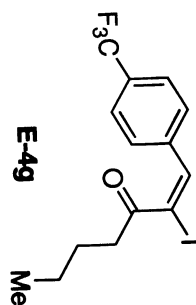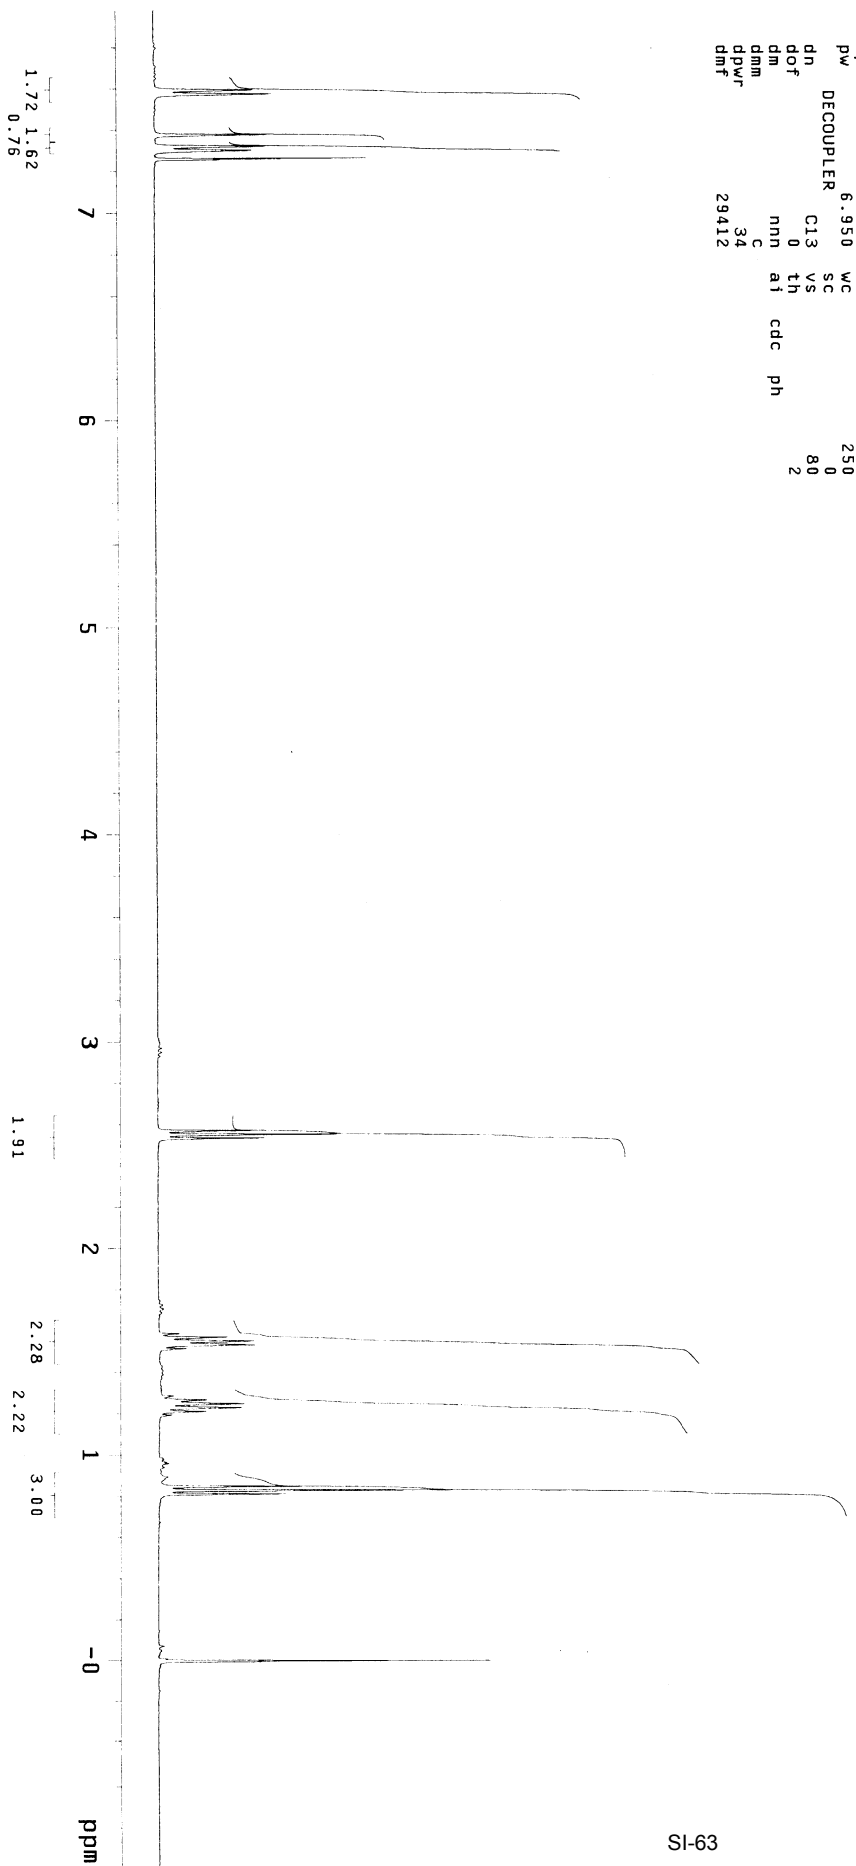

expt Carbon

SAMPLE SPECIAL  
date Feb 12 2007 temp 25.0  
solvent cdcl3 gain 30  
file /home/walkup/~ hst not used  
nmr500/walkup/data~ hst 0.008  
/699-1carbon.fid pw90 15.300  
ACQUISITION alfa 10.000  
sw 30487.8  
at 1.300 il  
np 79298 in  
fb 17000 dp  
bs 64 hs  
d1 1.000  
nt 20480 lb  
ct 128 fn  
TRANSMITTER C13  
tn 125.689 sp  
sfreq 125.689 wd  
tof 1255.3 rfi  
tpwr 49 rfp  
pw 7.650 tp  
DECOUPLER H1 lp  
dn H1  
dof 0  
dm 0  
dmm YYY WC  
dpwr W SC  
dmf 39 VS  
ai 3 TH  
cdc ph  
3

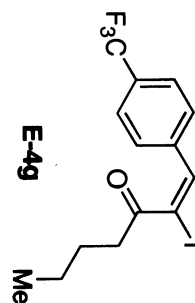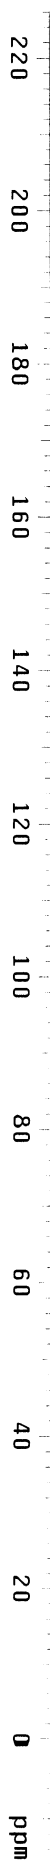



expl Proton

SAMPLE 4 2007 temp 25.0  
date Feb 4 2007 gain 30  
solvent cdcl3 not used  
file /home/vnmr1/n- spt 0.908  
mr500/walakup/data/~ hst 14.700  
Zhang/Guozhu/H1-20~ pw90 6.600  
070204-74.fid alfa  
ACQUISITION  
sw 8012.8 il n  
at 2.049 in n  
np 32830 dp v  
fb 4000 hs nn  
bs 8  
d1 1.000 lb 0.20  
nt 8 fn 65536  
ct 8  
TRANSMITTER  
tn H1 sp -677.8  
stfq 499.809 rfi 5211.2  
tof 499.7 rfi 1006.0  
tpwr 54 ffp -37.4  
pw 7.350 lp -40.1  
DECOUPLER  
dn C13 wc 250  
dof 0 sc 0  
dm nn vs 763  
dmm c th 2  
dpwr 34 ai  
dmf 32258  
cdcl3 ph

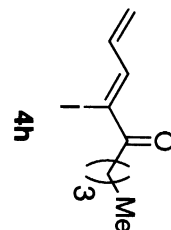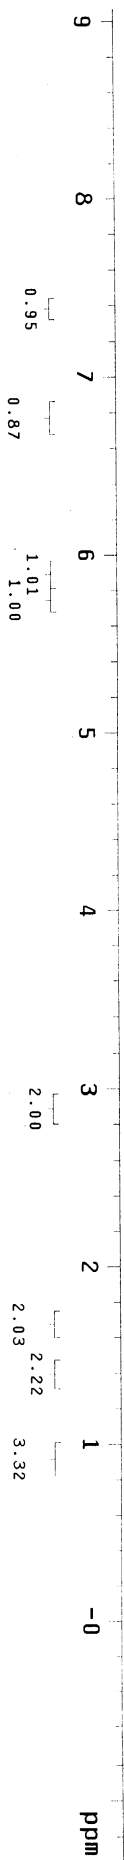

expl Carbon

SAMPLE 4 2007 SPECIAL 25.0  
date Feb 4 2007 temp 25.0  
solvent cdc13 gain 30  
title /home/vnmr1/nst not used  
mr500/waikup/data/~ 0.008  
Zhang/Guozhu/C13-2- pw90 15.300  
0070204-74-2.fid alfa 10.000  
ACQUISITION  
SW 30487.8 f1 n  
at 1.300 in n  
np 79298 dp y  
fb 17000 hs n  
bs 12  
d1 1.000 lb  
nt 12000 fn  
ct 5148  
TRANSMITTER SP  
tn C13 wp -2077.8  
sfrq 125.689 rfi 30487.3  
tof 1255.3 rfp 11755.3  
tpwr 49 rp 9677.1  
pw 7.650 lp -22.4  
DECOUPLER H1 WC PLOT -274.5  
dn HI WC 250  
dof 0 SC 0  
dm YYY VS 122606  
dmm w th  
dpwr 39 ai cdc ph 3  
dmf 12200

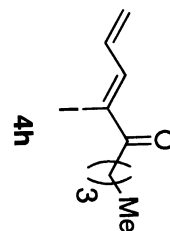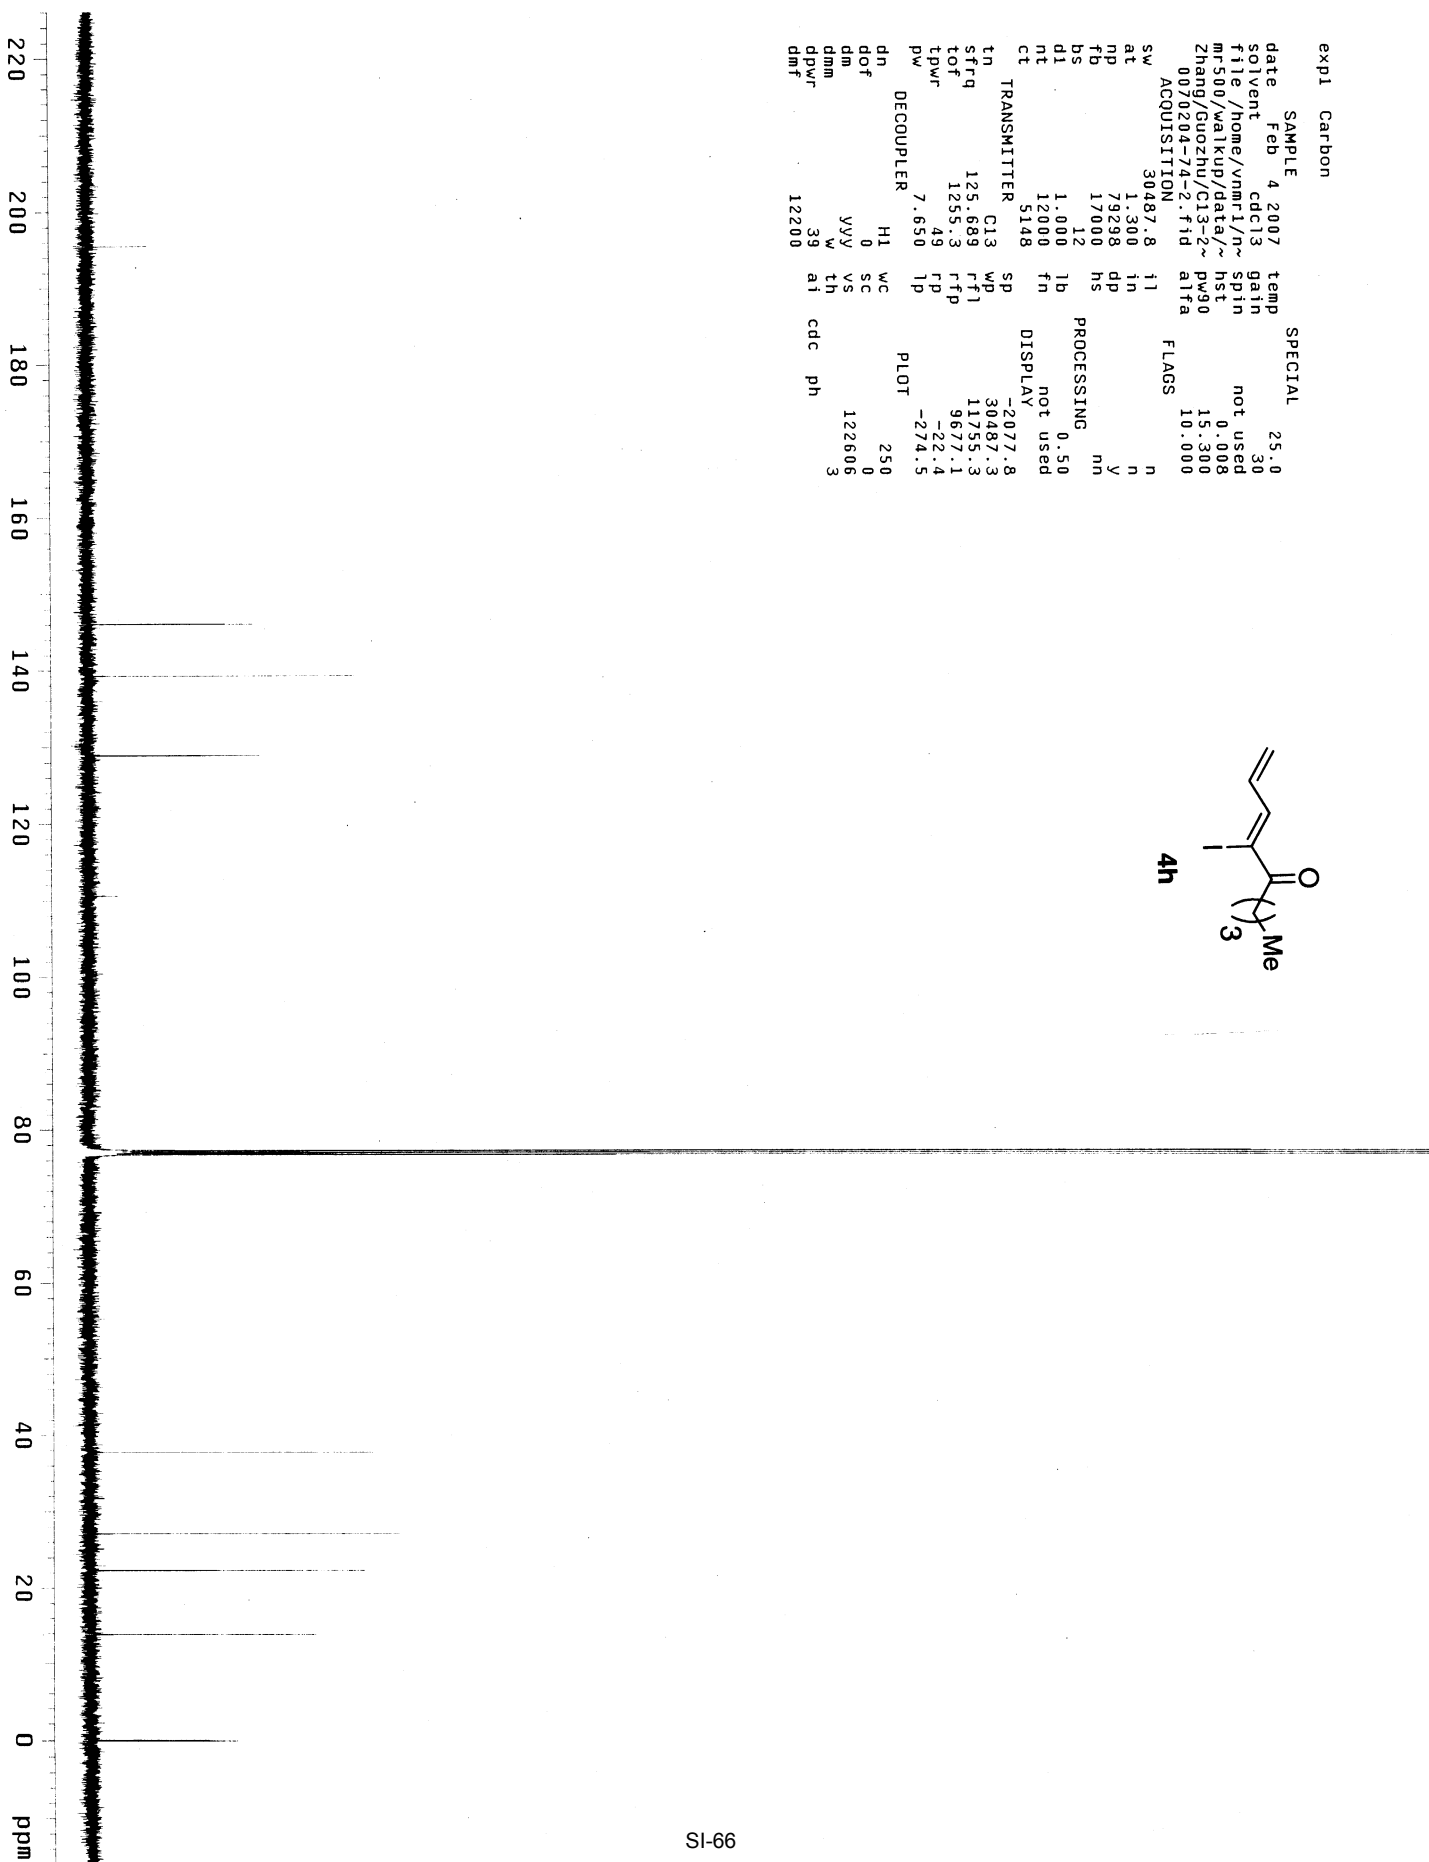

expl Proton

SAMPLE SPECIAL 25.0  
date Feb 12 2007 temp 30  
solvent cdc13 gain 30  
file /home/vnmr1/n- not used  
mr400/waikup/data/~ hst 0.008  
Zhang/Guozhu/H1-20~ pw90 13.900  
070212-84.fid alfa 6.600  
ACQUISITION  
SW 6410.3 il n  
at 2.049 in n  
np 26264 dp v  
fb 4000 hs nn  
bs 8  
dl 1.000 lb 0.20  
nt 8 fn 65536  
ct 8  
TRANSMITTER  
tn H1 sp -562.8  
sfrq 399.782 rf1 4209.3  
tof 399.5 rfp 805.2  
tpwr 59 fp 126.1  
pw 6.950 lp -44.8  
DECOUPLER  
dn C13 wc 250  
dof 0 sc 0  
dm nn vs 543  
dmm c th 2  
dpwr 34 ai cdc ph  
dmf 29412

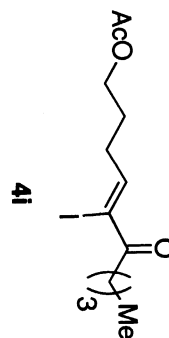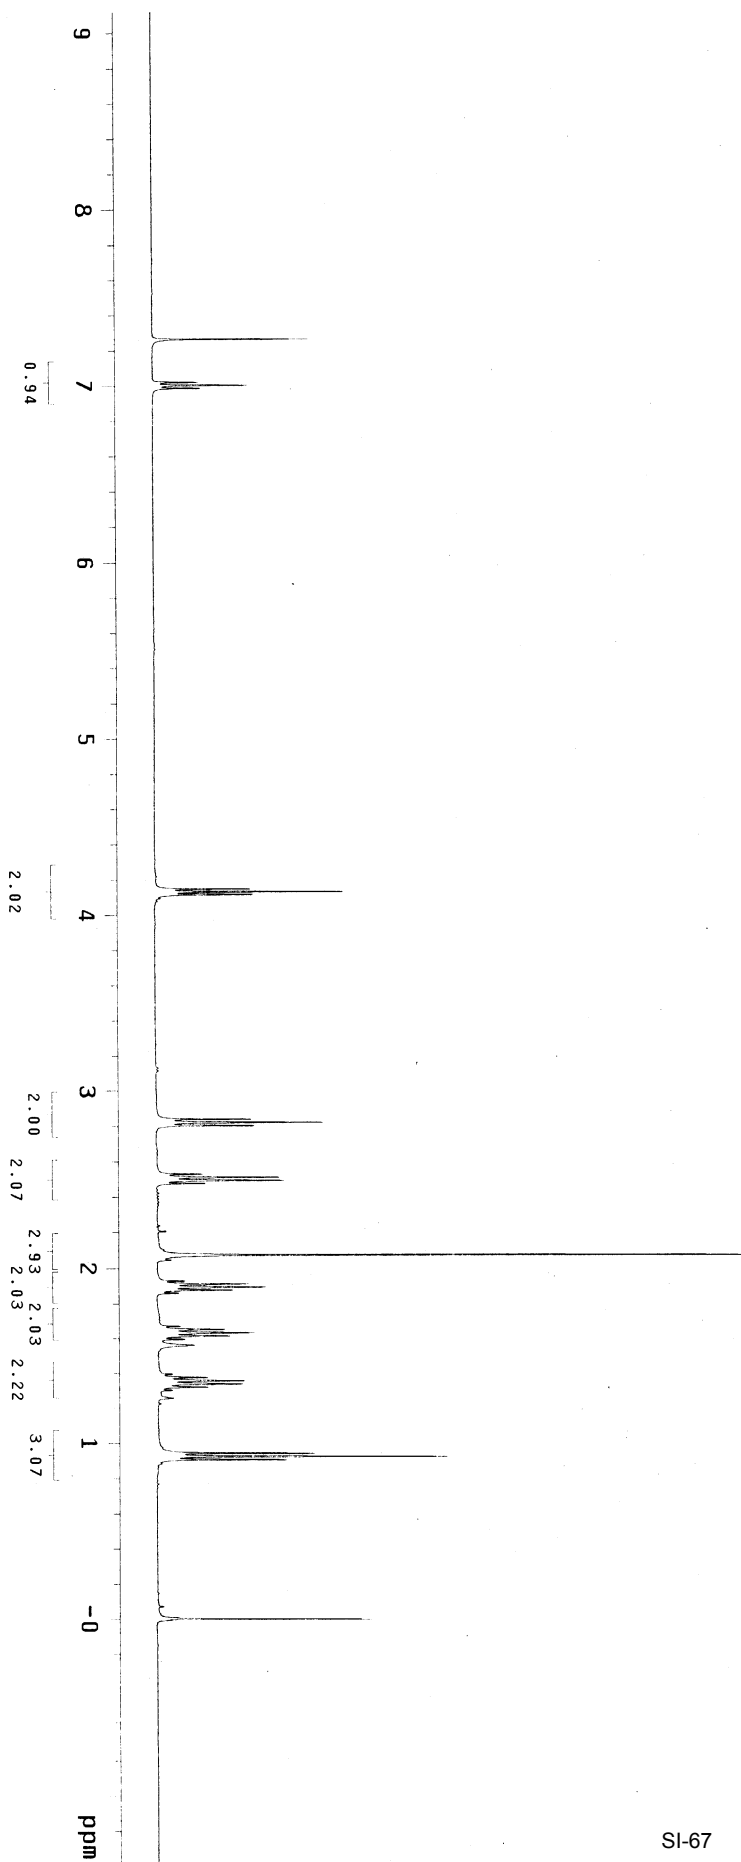

expl Carbon

| SAMPLE              |                | SPECIAL         |          |
|---------------------|----------------|-----------------|----------|
| date                | Feb 12 2007    | temp            | 25.0     |
| solvent             | cdcl3          | gain            | 30       |
| file                | /home/waikup/~ | spin            | not used |
| nmr500/waikup/data~ | hst            | 0.008           |          |
| /Zhang/Guozhu/C13~  | pw90           | 15.300          |          |
| 20070212-84.fid     | alfa           | 10.000          |          |
| ACQUISITION         |                | FLAGS           |          |
| sw                  | 30487.8        | il              | n        |
| at                  | 1.300          | in              | y        |
| np                  | 79298          | dp              | n        |
| fb                  | 17000          | hs              | nm       |
| bs                  | 12             | PROCESSING 0.50 |          |
| d1                  | 1.000          | lb              | not used |
| nt                  | 12000          | fn              | not used |
| ct                  | 960            | DISPLAY         |          |
| TRANSMITTER         |                | sp              | -2076.5  |
| tn                  | C13            | wp              | 30487.3  |
| sfrq                | 125.689        | rfl             | 11754.1  |
| tof                 | 1255.3         | rtp             | 9677.1   |
| tpwr                | 43             | tp              | -28.1    |
| pw                  | 7.650          | tp              | -280.5   |
| DECOUPLER           |                | PLOT            |          |
| dn                  | H1             | wc              | 250      |
| dof                 | 0              | sc              | 0        |
| dm                  | yyv            | vs              | 40671    |
| dmm                 | w              | th              | 6        |
| dwr                 | 39             | ai              | cdc ph   |
| dntf                | 12200          |                 |          |

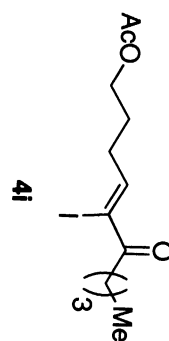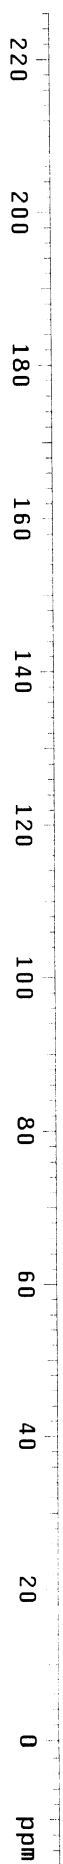

expl Proton

SPECIAL

date Sep 23 2006 temp 6.0  
solvent cdc13 gain not used  
title /home/walkup/~ not used  
vnmr/sys/data/auto\_~ hst 0.008  
2006.09.23\_05/Aug.~ pw90 19.800  
01/data/cdc13\_01.f~ alfa 6.600

FLAGS

ACQUISITION

id i1 n  
sw 8012.8 in n  
at 2.049 dp y  
np 32830 hs nm  
fb 4000  
bs 32 lb 0.20  
ss 2 fn 65536  
d1 1.000  
nt 8  
ct 8

DISPLAY

sp -514.5  
wp 4506.5  
rf1 1000.9  
rfp 0

TRANSMITTER

tn H1  
sfreq 499.809  
tofr 499.7  
tpwr 54  
pw 9.900

PLOT

WC 250  
SC 0  
VS 40  
TH 2

DECOUPLER

dn C13  
dof 0  
dm nn  
ddm ai  
dpuw cdc ph  
dmf 12300

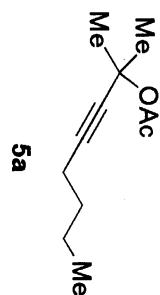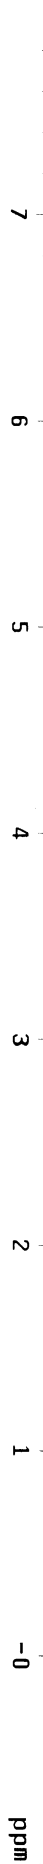

expt Carbon

SAMPLE SPECIAL

date Sep 23 2006 temp 6.0  
solvent cdc13 gain 30  
file /home/walkup/~ not used  
vnmrsvs/data/auto/~ hst 0.008  
2006.09.23\_05/Aug.~ pw90 13.500  
02/data/cdc13\_01.f~ alfa 10.000

FLAGS

id n

ACQUISITION

sw 30487.8 il n  
at 1.500 dp y  
np 79298 hs nm

PROCESSING

bs 64 lb 0.50  
dl 1.000 fn not used

DISPLAY

ct 3200 sp -405.8  
tn TRANSMITTER C13 wd 23692.5  
stfrq 125.689 rfi 11755.3  
tof 125.3 rfp 9677.1  
tpwr 46 tp 17.0  
pw 6.750 PLOT -325.6

DECOUPLER

dn H1 wc 250  
dof 0 vs 0  
dm yyv th 192980  
dmm v ai cdc ph 7  
dpwr 36  
dmt 7200

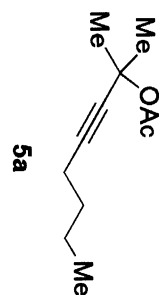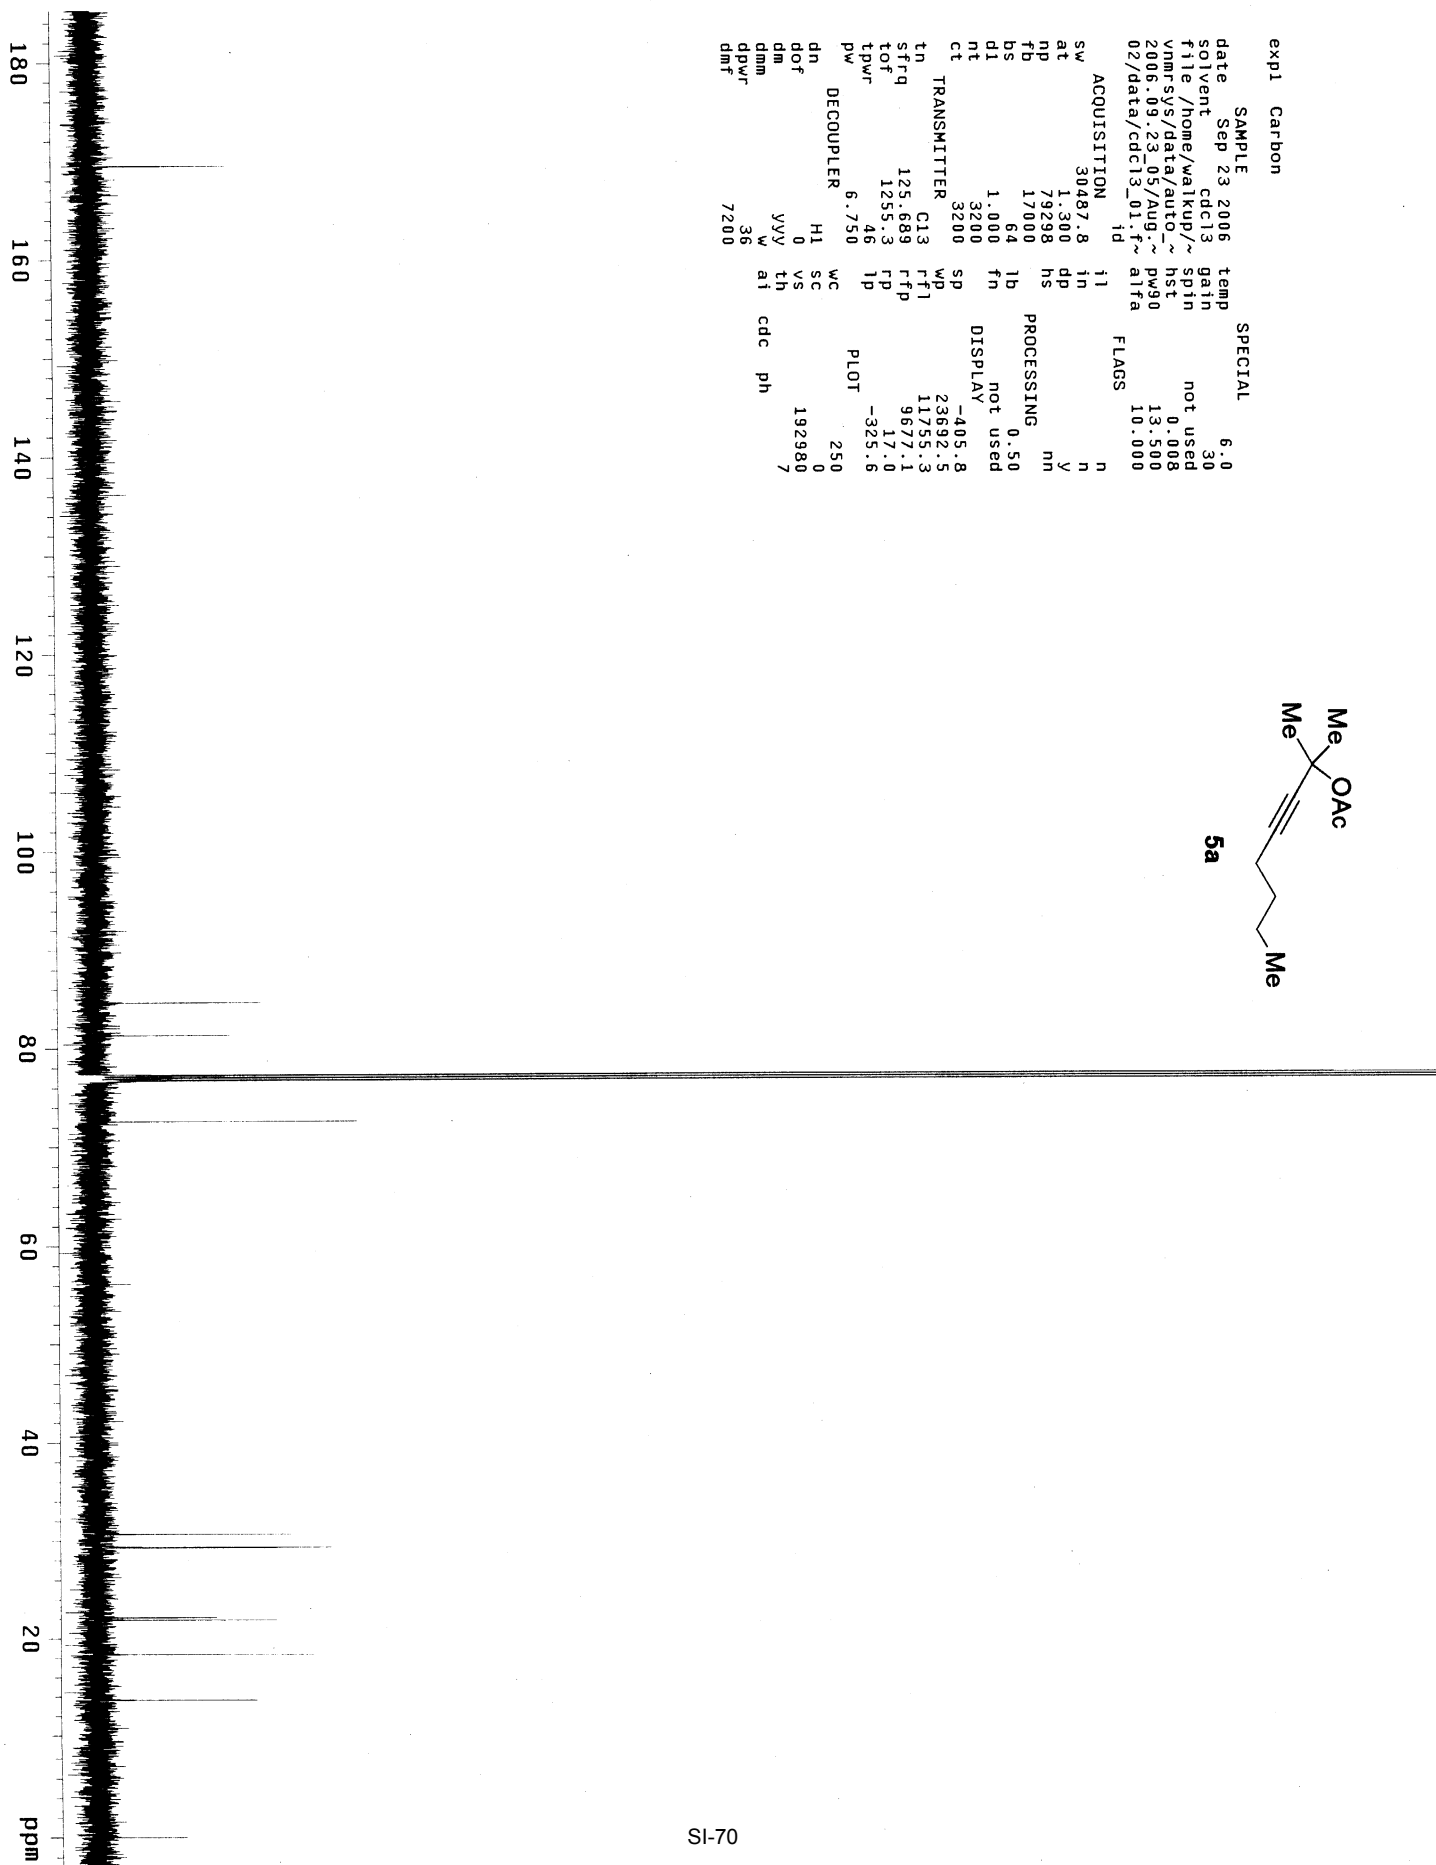

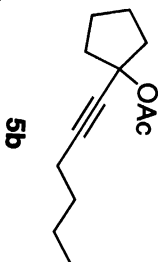

```

expt  Proton
SAMPLE
date   Sep 21 2006      temp  not used
solvent cdc13          gain   not used
file    /home/walkup/~  spm    not used
vnmrsws/data/autoc~   hst     0.008
2006.09.21_17/5-20~   pw90    13.900
060921_001/data/cd~   alpha   6.600
c13-01.fid
ACQUISITION
sw      6410.3          in      n
at      2.049          dd      y
np      26264          hs      nn
fb      4000           1b      0.20
bs      4             2       65536
ss      1.000          fn      DISPLAY
di      32            sp      -135.0
nt      32            wp      3248.6
ct      32            rfp     803.6
TRANSMITTER
tn      H1            rf      42.8
sfreq   399.782      lp      -44.2
tof      399.5       PLOT
tpwr     53          250
pw      6.950        0
DECOUPLER C13        220
dn      0            2
dof      th          ai      cdc   ph
dm      nn
dmm      c
dpwr     34
dmf      29412

```

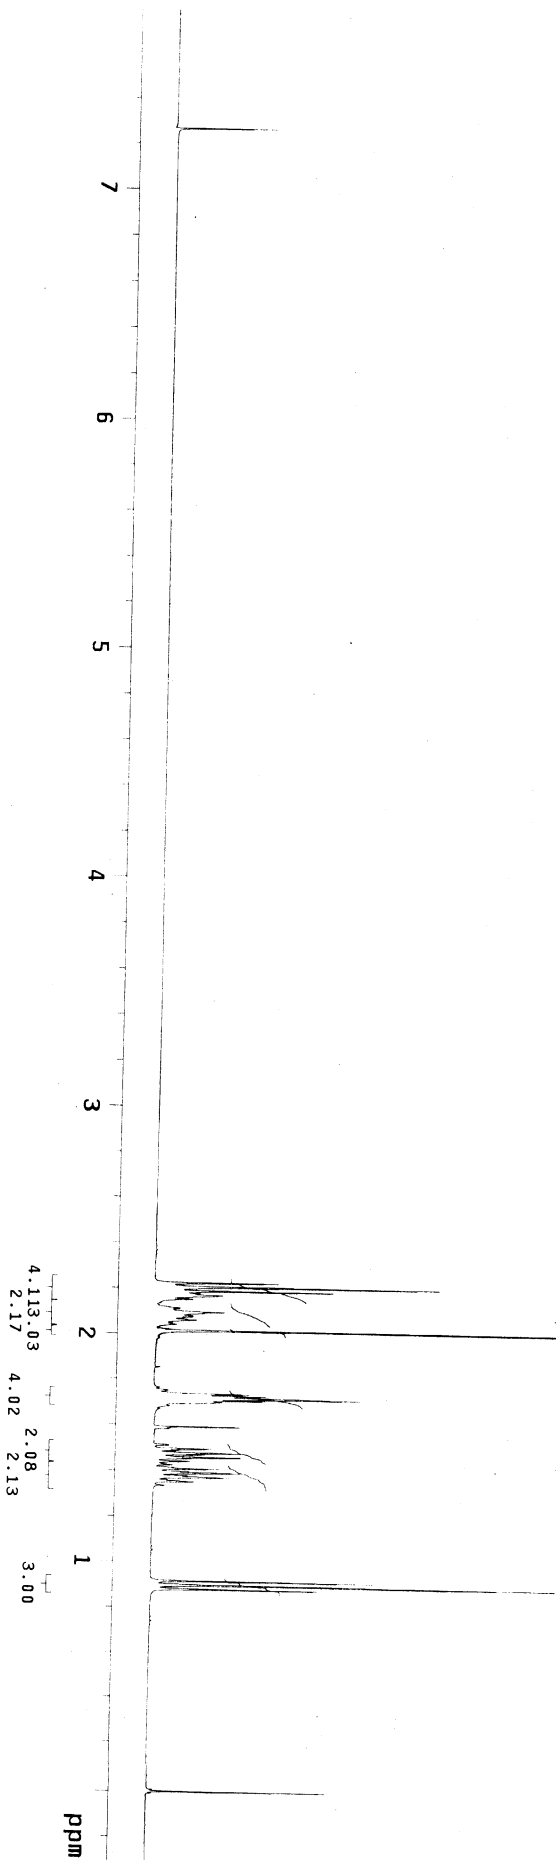

expt Carbon

| SAMPLE              |                | SPECIAL |             |
|---------------------|----------------|---------|-------------|
| date                | Sep 21 2006    | temp    | not used    |
| solvent             | cdcl3          | gain    | 30          |
| file                | /home/walkup/~ | spin    | not used    |
| nmr                 | sys/data/auto_ | hst     | 0.008       |
| 2006.09.21_17s-20~  |                | pw90    | 9.700       |
| 060921_001/data/cd~ |                | alfa    | 10.000      |
| c13-02.fid          |                | flags   |             |
| ACQUISITION         |                |         |             |
| sw                  | 24509.8        | il      | n           |
| at                  | 1.300          | in      | n           |
| np                  | 63750          | dp      | y           |
| fb                  | 17000          | hs      | nn          |
| bs                  | 64             | lb      | 0.50        |
| d1                  | 1.000          | fn      | not used    |
| nt                  | 2560           | display |             |
| ct                  | 448            | sp      | -140.3      |
| tn                  | TRANSMITTER    | wd      | 18478.8     |
| tn                  | c13            | rfl     | 9464.9      |
| sfrq                | 100.535        | rff     | 7740.4      |
| tof                 | 1042.6         | fp      | 72.0        |
| tpwr                | 35             | lp      | -207.0      |
| pw                  | 4.850          | plot    |             |
| DECOUPLER           |                |         |             |
| dn                  | H1             | wc      | 250         |
| dof                 | 0              | sc      | 0           |
| dm                  | yyv            | th      | 4.73566e+06 |
| dmm                 | w              | at      | 68          |
| dpwr                | 41             | cdc     | ph          |
| dmf                 | 9300           |         |             |

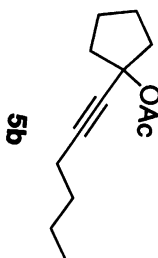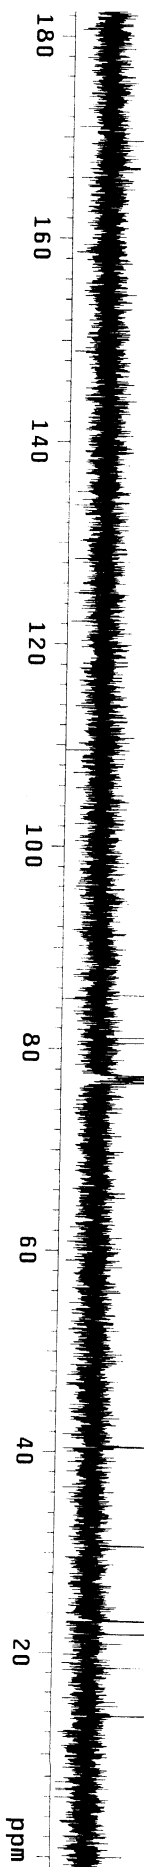



expt1 Proton

| SAMPLE              |                 | SPECIAL |          |
|---------------------|-----------------|---------|----------|
| date                | Sep 21 2006     | temp    | not used |
| solvent             | cdcl3           | gain    | 20       |
| file                | /home/walkup/~  | spin    | not used |
| data                | /Zhang/11ming/~ | hst     | 0.008    |
| -enone/cyclohexano- | pw90            | 13.900  |          |
| ne-hexyne-acetate-  | alpha           | 6.600   |          |

  

| ACQUISITION |        | PROCESSING |        |
|-------------|--------|------------|--------|
| sw          | 6410.3 | in         | n      |
| at          | 2.049  | dp         | y      |
| np          | 26264  | hs         | nn     |
| fb          | 4000   |            |        |
| bs          | 32     | 1b         | 0.20   |
| d1          | 1.000  | fn         | 65536  |
| nt          | 32     |            |        |
| ct          | 32     | sp         | -181.0 |

  

| TRANSMITTER |         | DISPLAY |        |
|-------------|---------|---------|--------|
| tn          | H1      | wd      | 3252.1 |
| sfrq        | 399.782 | rfl     | 804.0  |
| tof         | 399.5   | rfl     | 41.7   |
| tpwr        | 59      | tp      | -62.0  |
| pw          | 6.950   |         |        |

  

| DECOUPLER |       | PLOT |        |
|-----------|-------|------|--------|
| dn        | C13   | wc   | 250    |
| dof       | 0     | vs   | 0      |
| dm        | nmn   | th   | 24849  |
| dmm       | c     |      |        |
| dpwr      | 34    | ai   | cdc ph |
| dmf       | 29412 |      |        |

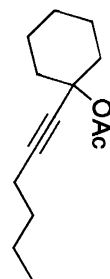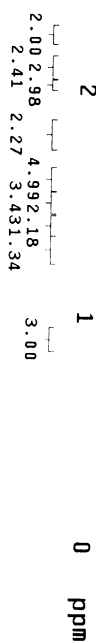

expt1 Carbon

| SAMPLE             |                |         |             | SPECIAL |  |  |  |
|--------------------|----------------|---------|-------------|---------|--|--|--|
| date               | sep 21 2006    | temp    | not used    |         |  |  |  |
| solvent            | cdcl3          | gain    | 30          |         |  |  |  |
| file               | /home/walkup/~ | spin    |             |         |  |  |  |
| data/              | zhang/1hmq/    | hst     | not used    |         |  |  |  |
| -name              | /cyclohexano-  | pw30    | 0.008       |         |  |  |  |
| ne-hexyne-acetate- | ~              | alfa    | 9.700       |         |  |  |  |
|                    | C13.fid        |         | 10.000      |         |  |  |  |
| ACQUISITION        |                |         |             | FLAGS   |  |  |  |
| sw                 | 24509.8        | f1      | n           |         |  |  |  |
| at                 | 1.300          | in      | n           |         |  |  |  |
| np                 | 63750          | dp      | n           |         |  |  |  |
| fb                 | 17000          | hs      | y           |         |  |  |  |
| bs                 | 64             | lb      | n           |         |  |  |  |
| d1                 | 1.000          | fn      | 0.50        |         |  |  |  |
| nt                 | 20000          |         | not used    |         |  |  |  |
| ct                 | 128            | DISPLAY |             |         |  |  |  |
| TRANSMITTER        |                |         |             | -505.3  |  |  |  |
| tn                 | C13            | wp      | 19496.1     |         |  |  |  |
| sfreq              | 100.535        | rfl     | 9464.9      |         |  |  |  |
| tof                | 1042.6         | rp      | 7740.4      |         |  |  |  |
| tpwr               | 55             | tp      | 49.1        |         |  |  |  |
| pw                 | 4.850          | lp      | -182.4      |         |  |  |  |
| DECOUPLER          |                |         |             | PLOT    |  |  |  |
| dn                 | H1             | wc      | 250         |         |  |  |  |
| dof                | 0              | sc      | 0           |         |  |  |  |
| dm                 | yyv            | vs      | 7.95574e+06 |         |  |  |  |
| dmm                | yv             | th      | 6           |         |  |  |  |
| dpmr               | 41             | ai      | cdc         |         |  |  |  |
| dmf                | 9300           | ph      |             |         |  |  |  |

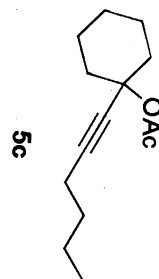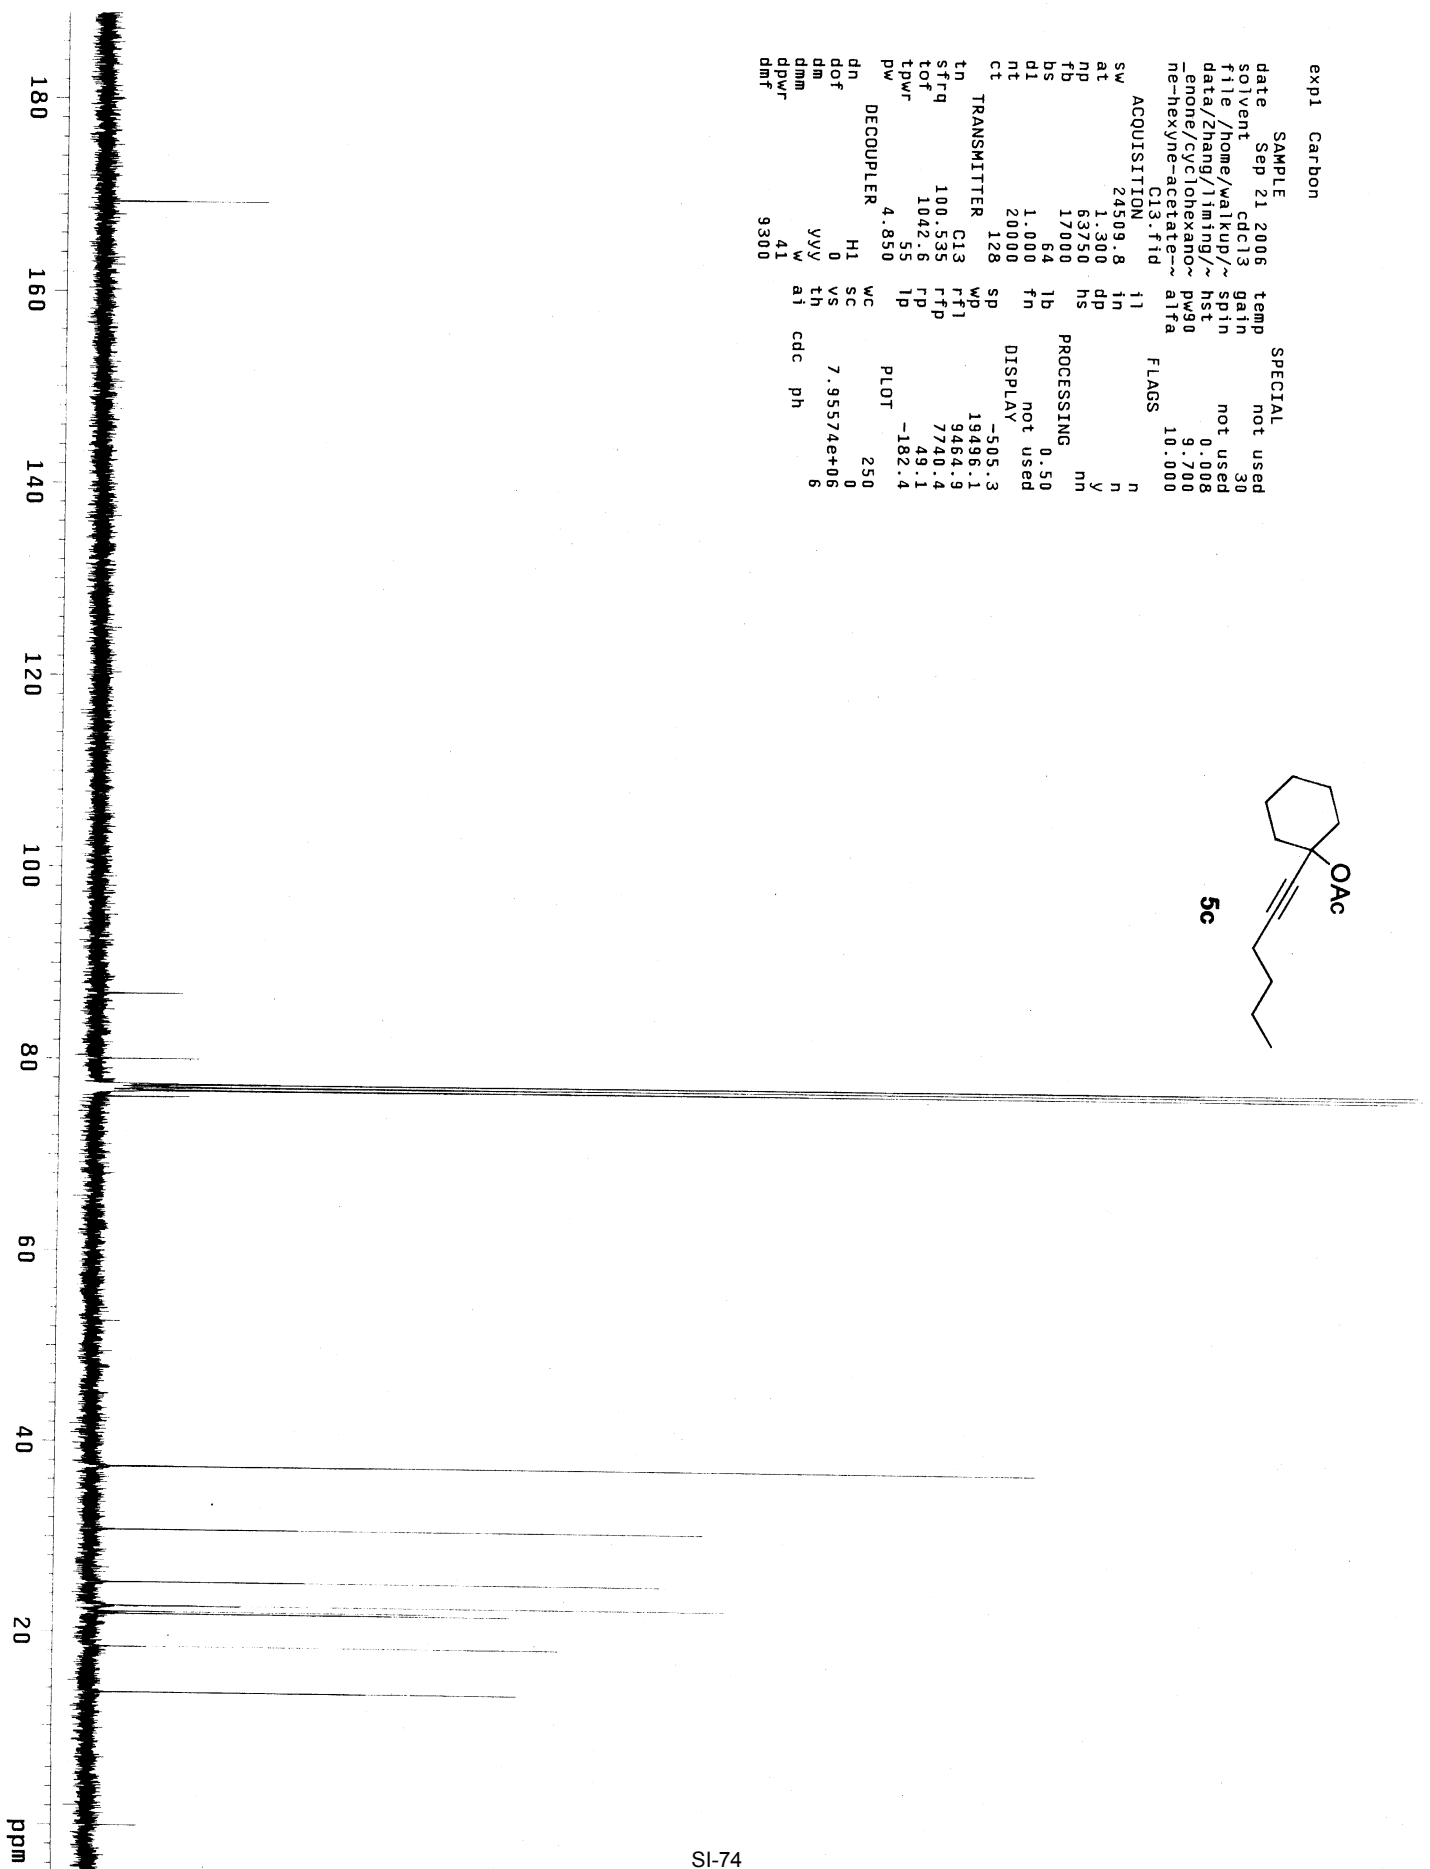

STANDARD 1H OBSERVE - profile

exp2 Proton

|                    |                |            |          |
|--------------------|----------------|------------|----------|
| SAMPLE             |                | SPECIAL    |          |
| date               | Jun 29 2006    | temp       | 25.0     |
| solvent            | cdcl3          | gain       | not used |
| file               | /home/walkup/~ | spin       | not used |
| nmr                | sys/data/autoc | hst        | 0.008    |
| 2006.06.29_30/5_20 | pw90           | 14.000     |          |
| 060629_001/data/cd | alfa           | 6.600      |          |
| c13.01.fid         | flags          |            |          |
| ACQUISITION        |                | PROCESSING |          |
| sw                 | 6410.3         | in         | n        |
| at                 | 2.049          | dp         | y        |
| np                 | 26264          | hs         | nn       |
| fb                 | 4000           | lb         | 0.20     |
| bs                 | 32             | fn         | 65536    |
| ss                 | 2              | td         |          |
| d1                 | 1.000          | sp         | -94.0    |
| nt                 | 8              | wd         | 3289.2   |
| ct                 | 8              | rfi        | 3707.1   |
| td                 | TRANSMITTER    | tp         | 2902.4   |
| sfreq              | H1             | ip         | 151.9    |
| tof                | 399.782        | pl         | -29.5    |
| tpwr               | 399.5          | plot       |          |
| pw                 | 58             | wc         | 250      |
| DECOUPLER          |                | sc         | 0        |
| dn                 | C13            | vs         | 717      |
| dof                | 0              | th         | 3        |
| dm                 | nmn            | at         |          |
| dmm                | c              | cdc        | ph       |
| dpmr               | 0              |            |          |
| dmt                | 200            |            |          |

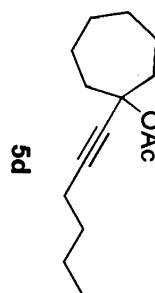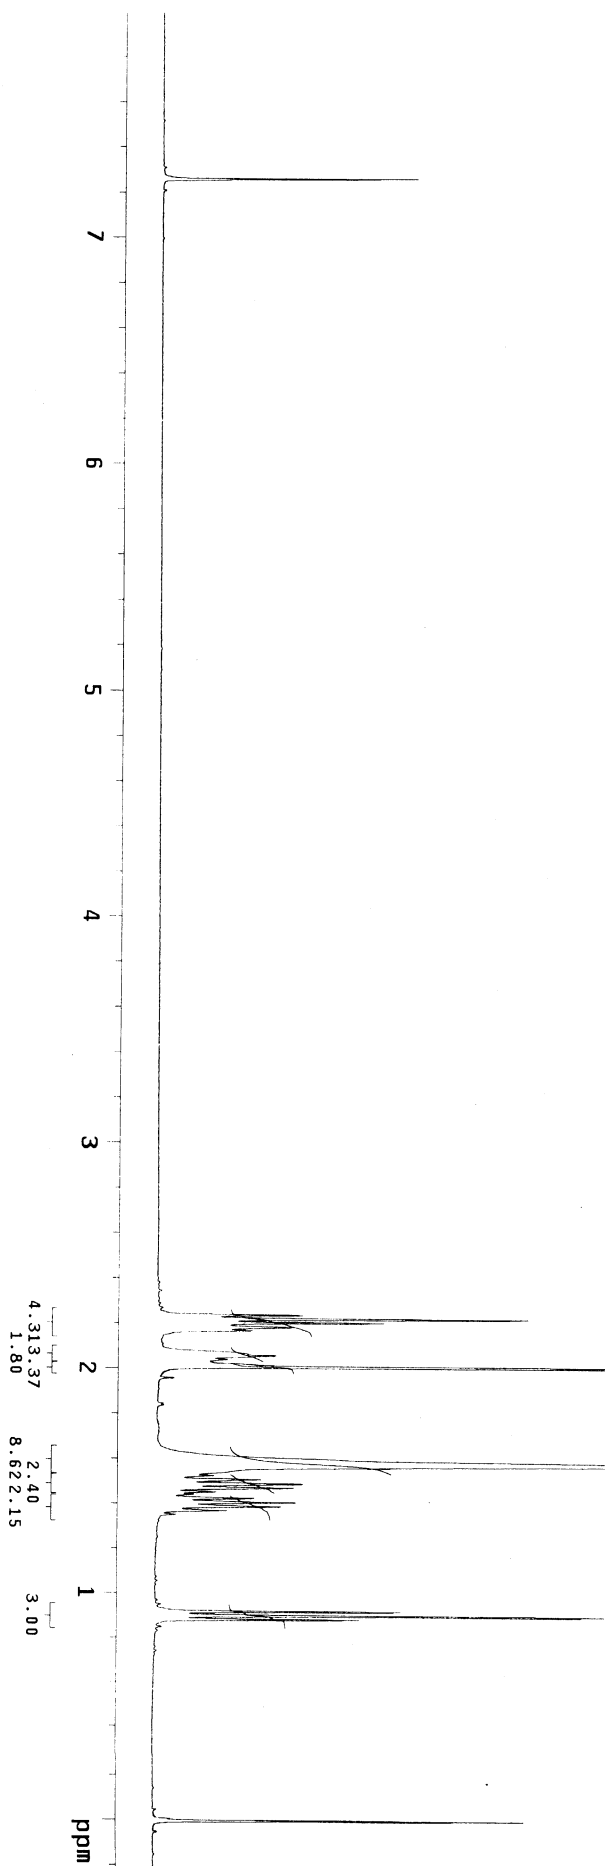

expt Carbon

SAMPLE SPECIAL  
date Sep 24 2006 temp 6.0  
solvent cdc13 gain 30  
file /home/waikup/~ not used  
vnmr/s/data/auto/~ hst 0.008  
2006.09.24/Aug.01/~ pw90 13.500  
data/cdc13\_01.fid alfa 10.000  
ACQUISITION  
sw 30487.8 f1  
at 1.300 in n  
np 79298 dp y  
fb 17000 ns n  
bs 64  
dl 1.000 lb 0.50  
nt 25600 fn not used  
ct 1216  
TRANSMITTER  
tn C13 sp -799.0  
sfrq 125.689 rfi 11756.8  
tof 1255.3 rfp 9677.1  
tdwr 46 tp -25.2  
pw 6.750 tp -212.8  
DECOUPLER  
dn H1 WC PLOT  
dof 0 SC 250  
dm 0 VS 0  
dmm YVY 400000  
dpwr w th 15  
dmf 36 ai cdc ph  
7200

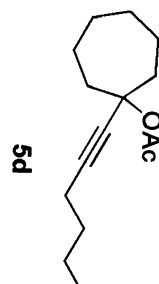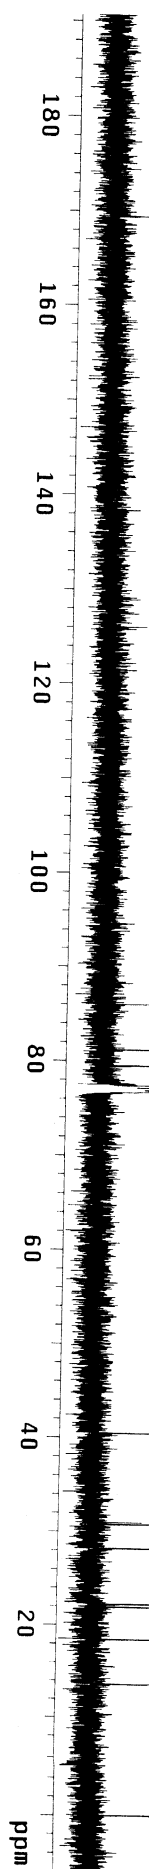

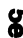[illegible]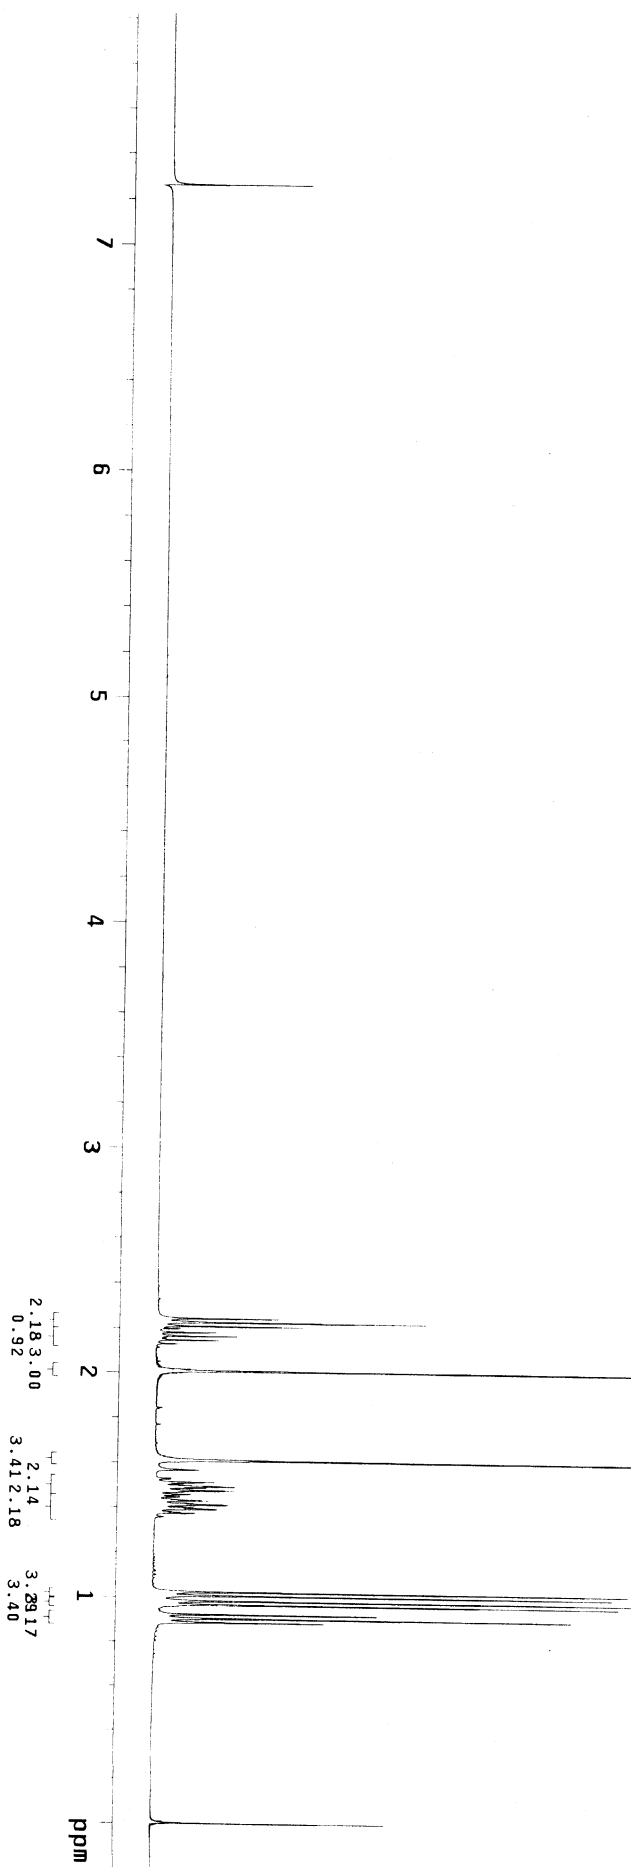

expi Carbon

SAMPLE date Sep 22 2006 temp 25.0  
solvent cdc13 gain 30  
file /home/walkup/~ hst not used  
vnmr.sys/data/autoc- hst 0.008  
2006.09.22\_25/S-20~ pw90 9.700  
060922\_001/data/cd~ alfa 10.000  
c13-02.fid  
ACQUISITION  
sw 24509.8 i1 n  
at 1.300 in n  
np 63750 dp y  
fb 17000 hs nm  
bs 64 lb 0.50  
dl 1.000 tn not used  
nt 2560  
ct 192  
TRANSMITTER  
tn C13 wp -254.8  
sfreq 100.535 rfi 18526.7  
tof 1042.6 rfp 9463.4  
tpwr 1042.6 ip 7740.4  
pw 4.850 ip 65.2  
DECOUPLER WC PLOT -210.2  
dn H1 WC 250  
dof 0 SC 0  
dm 0 VS 4.64177e+06  
dmm yvy th 68  
dpwr w ai cdc ph  
dmf 9300

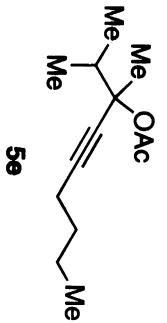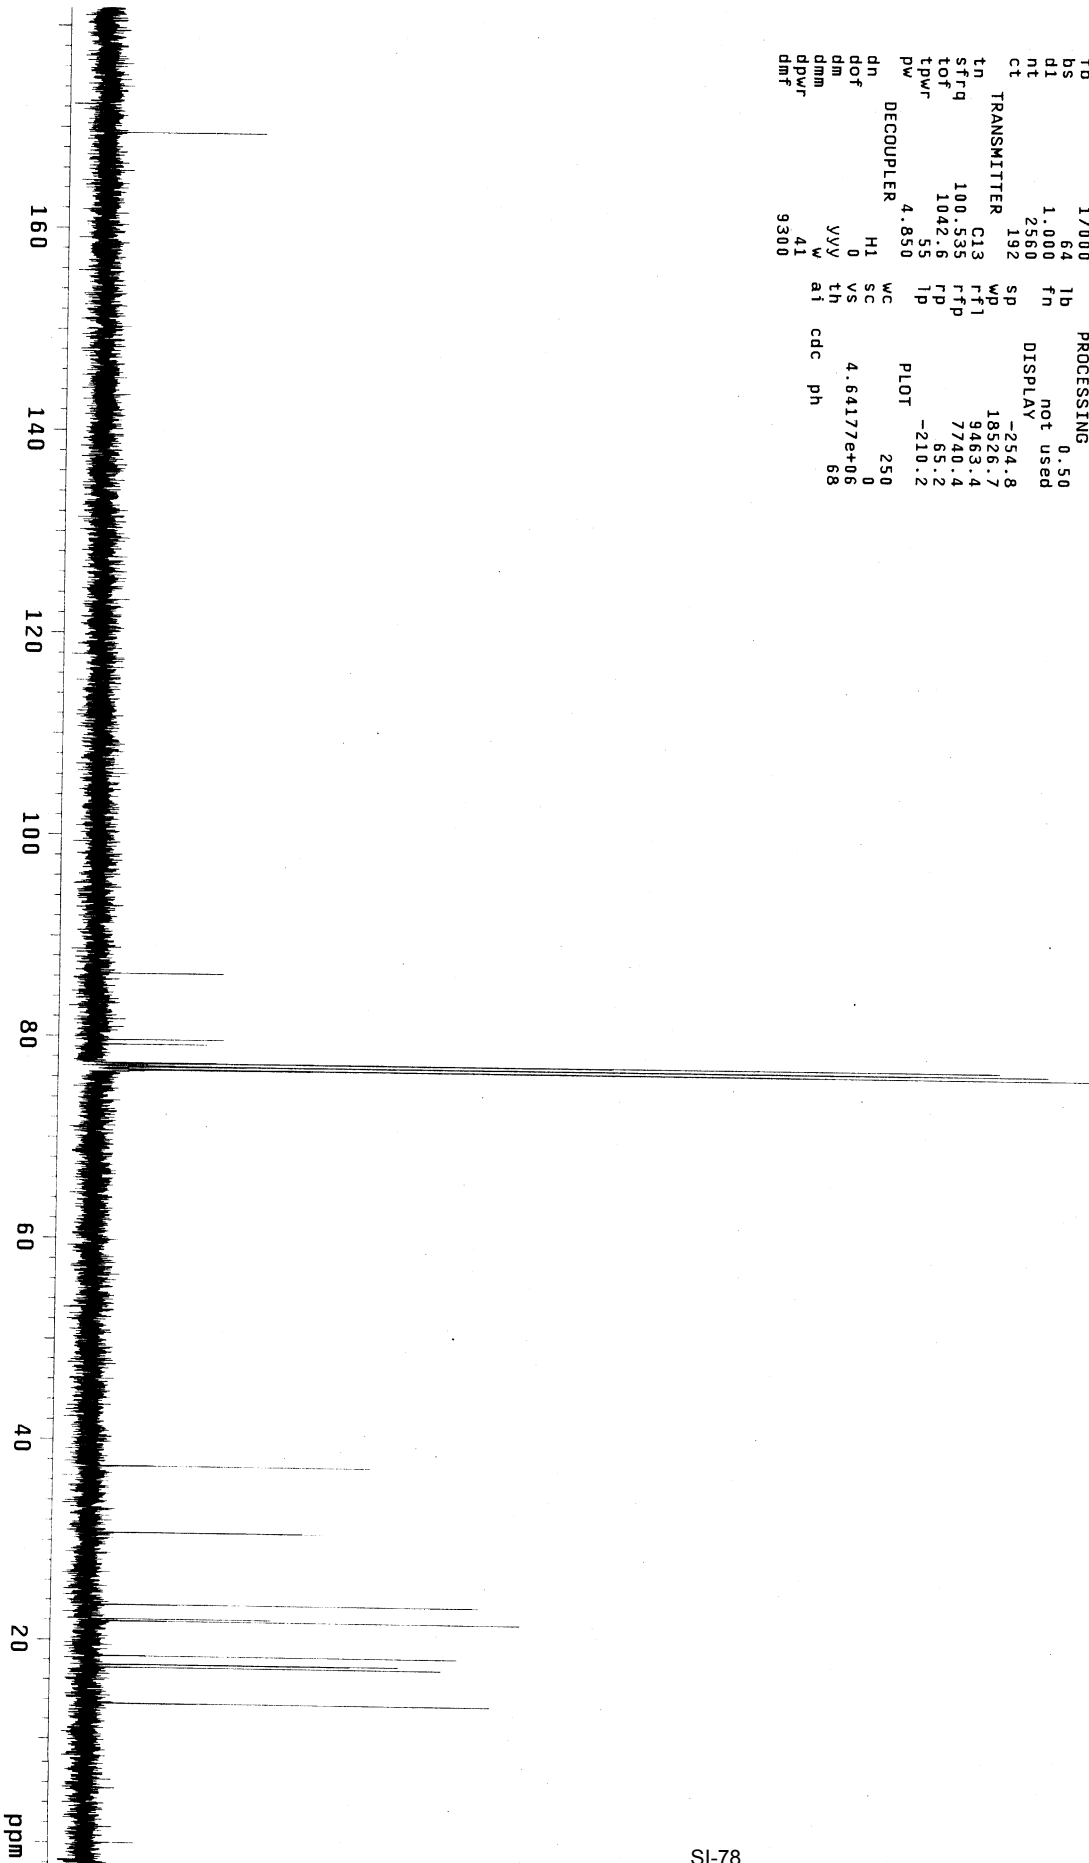

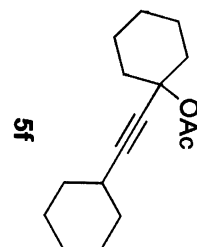

expt1 Proton

|                     |                |            |          |
|---------------------|----------------|------------|----------|
| SAMPLE              |                | SPECIAL    |          |
| date                | Sep 30 2006    | temp       | 25.0     |
| solvent             | cdcl3          | gain       | not used |
| file                | /mnt/nmr400/w- | spn        | not used |
| alkup/data/Zhang/G~ | hst            | pw90       | 0.008    |
| uotaol1/243.fid     | pw90           | 13.900     |          |
| ACQUISITION         |                | alfa       | 6.600    |
| sw                  | 6410.3         | FLAGS      |          |
| at                  | 2.049          | il         | n        |
| np                  | 26264          | in         | n        |
| fb                  | 4000           | dp         | y        |
| bs                  | 32             | hs         | nn       |
| ss                  | 2              | PROCESSING |          |
| dl                  | 1.000          | lb         | 0.20     |
| nt                  | 8              | fn         | 65536    |
| ct                  | 8              | DISPLAY    |          |
| TRANSMITTER         |                | sp         | -205.8   |
| tn                  | H1             | wd         | 4346.2   |
| sfrq                | 399.782        | rfl        | 805.0    |
| tof                 | 399.5          | rffp       | 0        |
| tpwr                | 59             | tp         | 96.6     |
| pw                  | 6.950          | tp         | -16.0    |
| DECOUPLER           |                | PLOT       |          |
| dn                  | C13            | wc         | 250      |
| dof                 | 0              | sc         | 0        |
| dm                  | nn             | vs         | 222      |
| dmm                 | c              | th         | 2        |
| dpwr                | 34             | ai         | cdc      |
| dmf                 | 29412          | ph         |          |

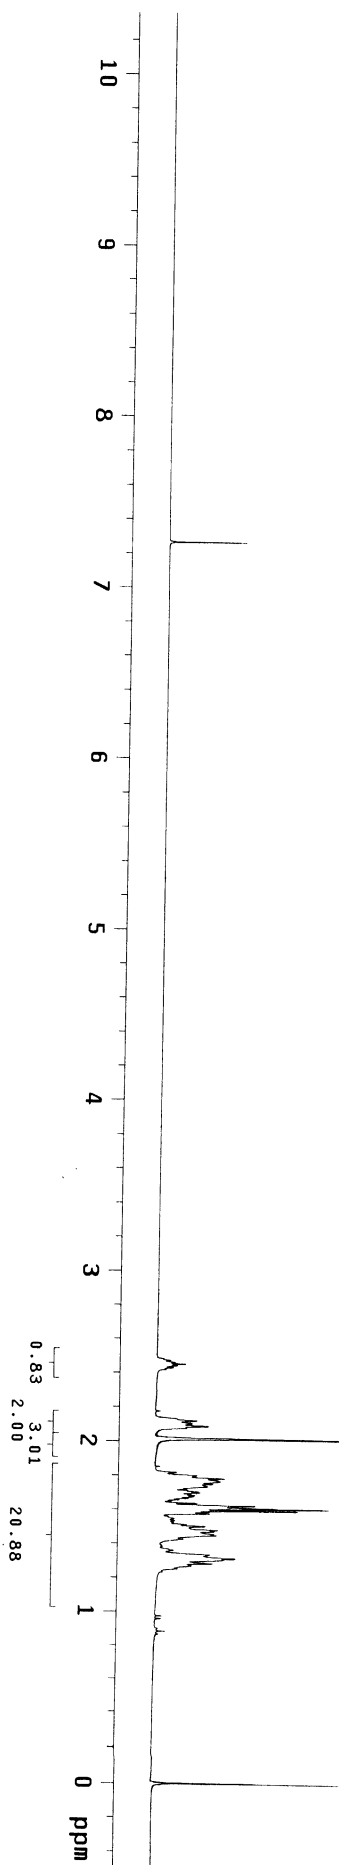

expt Carbon

SAMPLE SPECIAL  
date Sep 30 2006 temp 25.0  
solvent cdcl3 gain 30  
file /home/walakup/~ spin not used  
vnmrsvs/data/auto/~ hst 0.008  
2006\_09\_30\_08/S\_20~ pw90 9.700  
060930\_004/data/cd- alfa 10.000  
c13\_01.f1d

FLAGS

n

11

in

dp

hs

nn

ACQUISITION  
sw 24509.8  
at 1.300  
np 63750  
fb 17000  
bs 64  
dl 1.000  
nt 10240  
ct 2176  
tn TRANSMITTER  
stf 100.535  
tof 1042.6  
tpwr 55  
pw 4.850  
dn DECOUPLER  
dm H1  
dm 0  
dm yv 41  
dm w  
dm ai  
dm cdc  
dm ph  
dm 9300

PROCESSING  
0.50  
not used

DISPLAY  
-223.3  
18165.4  
9463.4  
7740.4  
161.4  
-186.6

PLOT  
250  
0  
4.35749e+06  
6

5f

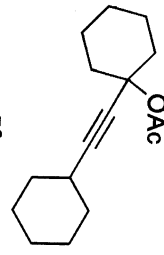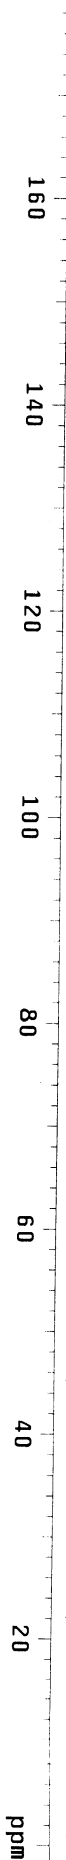



STANDARD 1H OBSERVE - profile  
STANDARD 1H OBSERVE - profile  
STANDARD 1H OBSERVE - profile  
STANDARD 1H OBSERVE - profile

expt1 Proton

| SAMPLE              |                 | SPECIAL    |          |
|---------------------|-----------------|------------|----------|
| date                | Sep 26 2006     | temp       | 25.0     |
| solvent             | cdcl3           | gain       | not used |
| file                | /home/walkup/~  | spin       | not used |
| nmr                 | sys/data/autoc~ | hst        | 0.008    |
| 2006.09.26_33/s-20~ |                 | pw90       | 13.900   |
| 060926_003/data/cd~ |                 | alpha      | 6.500    |
| c13.01.fid          |                 | flags      |          |
| ACQUISITION         |                 |            |          |
| sw                  | 6410.3          | in         | n        |
| at                  | 2.049           | dp         | y        |
| np                  | 26264           | hs         | nn       |
| fb                  | 4000            | PROCESSING |          |
| bs                  | 32              | lb         | 0.20     |
| ss                  | 2               | fn         | 65536    |
| d1                  | 1.000           | DISPLAY    |          |
| nt                  | 8               | sp         | -402.8   |
| ct                  | 8               | wd         | 3604.2   |
| TRANSMITTER         |                 |            |          |
| tn                  | H1              | rfp        | 805.8    |
| sfreq               | 399.782         | fp         | 117.9    |
| tof                 | 399.5           | lp         | -41.5    |
| tpwr                | 59              | PLOT       |          |
| pw                  | 6.950           | sc         | 250      |
| DECOUPLER           |                 |            |          |
| dn                  | C13             | vs         | 0        |
| dof                 | 0               | th         | 200      |
| dmm                 | nmn             | at         | cdc      |
| dpmr                | c               | ph         |          |
| dmt                 | 29412           |            |          |

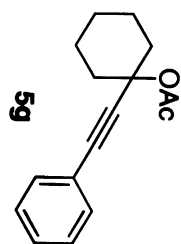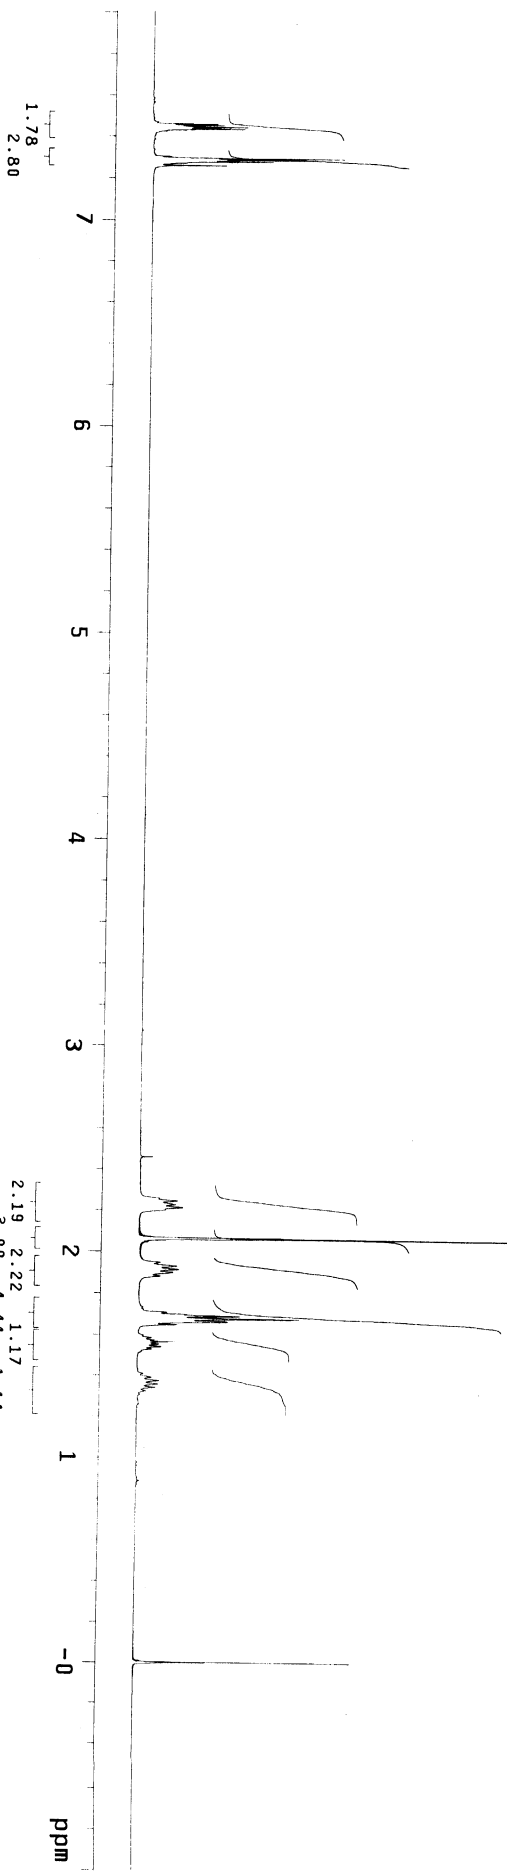

## STANDARD 1H OBSERVE - profile

expt Carbon

| SAMPLE              |                | SPECIAL |          |
|---------------------|----------------|---------|----------|
| date                | Sep 28 2006    | temp    | 25.0     |
| solvent             | cdcl3          | gain    | 30       |
| file                | /home/waikup/~ | spin    | not used |
| nmrsvs              | /data/auto/~   | hst     | 0.008    |
| 2006.09.28/Aug.01/~ | pw90           | 15.300  |          |
| data/cdcl3_01.fid   | atfa           | 10.000  |          |
| ACQUISITION         |                | FLAGS   |          |
| sw                  | 30487.8        | 11      | n        |
| at                  | 1.300          | in      | n        |
| np                  | 79298          | dp      | y        |
| fb                  | 17000          | hs      | n        |
| bs                  | 64             |         |          |
| dl                  | 1.000          | lb      | 0.50     |
| nt                  | 3300           | fn      | not used |
| ct                  | 3264           |         |          |
| TRANSMITTER         |                | DISPLAY |          |
| tn                  | C13            | sp      | -1292.8  |
| strq                | 125.689        | wp      | 28888.0  |
| tof                 | 1255.3         | rfl     | 2074.8   |
| tpwr                | 49             | rfd     | 0        |
| pw                  | 7.650          | lp      | -97.8    |
| DECOUPLER           |                | PLOT    |          |
| dn                  | H1             | wc      | 250      |
| dof                 | 0              | sc      | 0        |
| dm                  | yyv            | vs      | 19078    |
| dmm                 | w              | th      | -2       |
| dpwr                | 39             | at      | cdc      |
| dmf                 | 12200          | ph      |          |

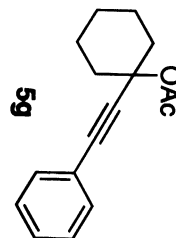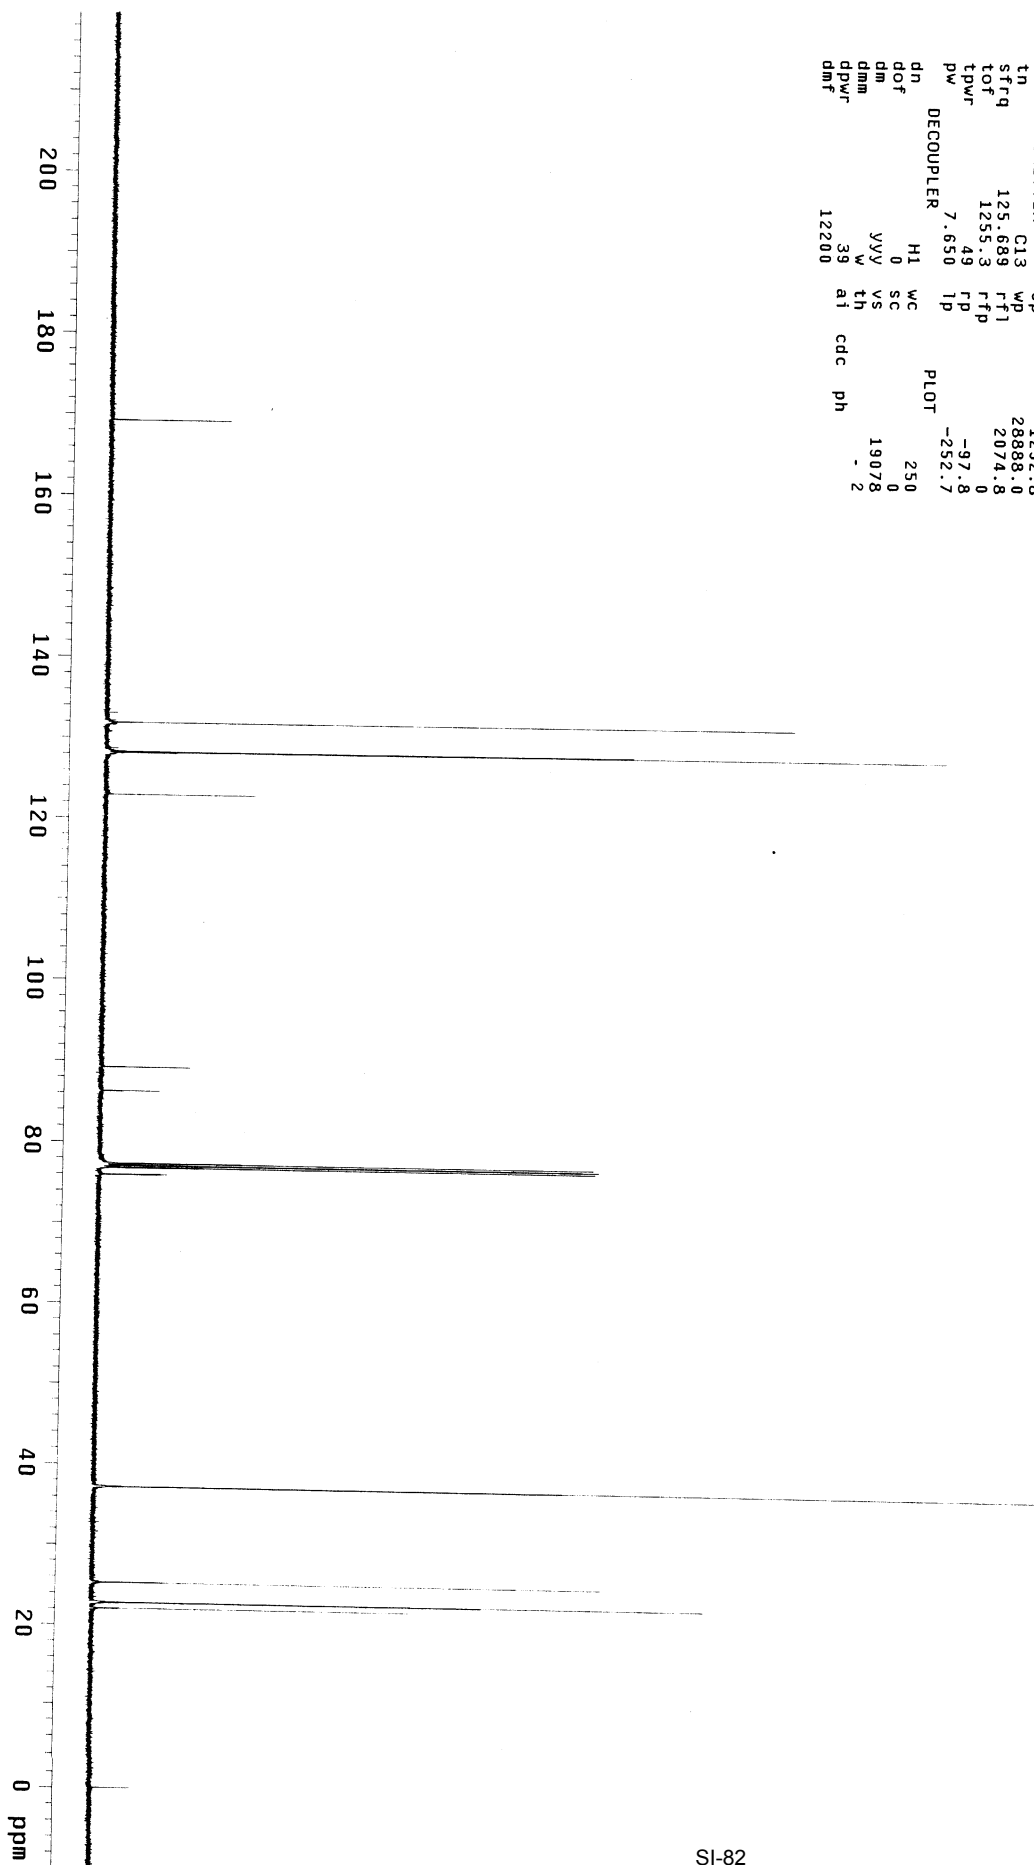

STANDARD 1H OBSERVE - profile  
STANDARD 1H OBSERVE - profile  
STANDARD 1H OBSERVE - profile  
STANDARD 1H OBSERVE - profile

exp2 Proton

| SAMPLE              |                  | SPECIAL    |          |
|---------------------|------------------|------------|----------|
| date                | Jan 5 2007       | temp       | 25.0     |
| solvent             | cdcl3            | gain       | not used |
| file                | /home/walkup/~   | spin       | not used |
| nmr                 | sys/data/autoc13 | hst        | 0.008    |
| 2007.01.05_09/s-20~ |                  | pw90       | 13.900   |
| 070105_004/data/cd~ |                  | alfa       | 6.500    |
| c13 01.fid          |                  | flags      |          |
| ACQUISITION         |                  |            |          |
| sw                  | 6410.3           | il         | n        |
| at                  | 2.049            | dp         | y        |
| np                  | 26264            | hs         | nn       |
| fb                  | 4000             | PROCESSING |          |
| bs                  | 32               | lb         | 0.20     |
| ss                  | 2                | fn         | 65536    |
| d1                  | 1.000            | DISPLAY    |          |
| nt                  | 8                | sp         | -400.7   |
| ct                  | 8                | wd         | 3601.5   |
| TRANSMITTER         |                  |            |          |
| tn                  | H1               | rfp        | 805.0    |
| stfq                | 399.782          | tp         | -47.5    |
| tof                 | 399.5            | lp         | -36.0    |
| tpwr                | 59               | PLOT       |          |
| pw                  | 6.950            | wc         | 250      |
| DECOUPLER           |                  |            |          |
| dn                  | C13              | vs         | 0        |
| dof                 | 0                | th         | 100      |
| dm                  | nmn              | ai         | cdc      |
| dmm                 | 0                | ph         | 3        |
| dpwr                | 34               |            |          |
| dnt                 | 29412            |            |          |

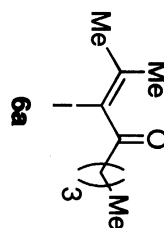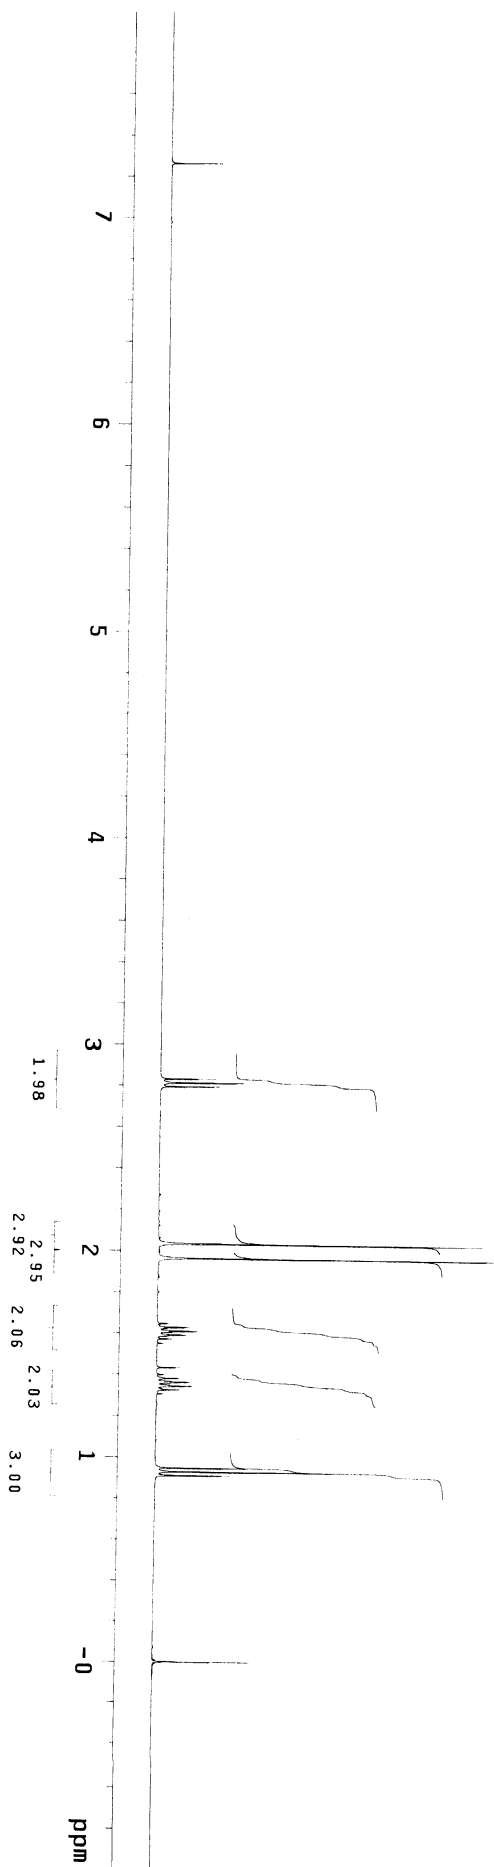

## STANDARD 1H OBSERVE - profile

exptl Carbon

| SAMPLE              |                | SPECIAL    |          |
|---------------------|----------------|------------|----------|
| date                | Jan 8 2007     | temp       | 25.0     |
| solvent             | cdcl3          | gain       | 30       |
| file                | /home/walkup/~ | spin       | not used |
| nmrSYS/data/auto_~  | hst            | pw90       | 0.008    |
| 2007.01.08.11/Aug.~ | pw90           | 15.300     |          |
| 01/data/cdcl3_01.f~ | alfta          | 10.000     |          |
| ACQUISITION         |                | FLAGS      |          |
| sw                  | 30487.8        | in         | n        |
| at                  | 1.300          | dp         | v        |
| np                  | 79298          | hs         | nn       |
| fb                  | 17000          | PROCESSING |          |
| bs                  | 32             | lb         | 0.50     |
| dl                  | 1.000          | fn         | not used |
| nt                  | 2560           | DISPLAY    |          |
| ct                  | 224            | sp         | -2075.8  |
| TRANSMITTER         |                | wp         | 30487.3  |
| tn                  | C13            | rfl        | 11754.4  |
| sfrq                | 125.689        | rfd        | 9678.1   |
| tof                 | 1255.3         | rp         | 154.2    |
| tpwr                | 49             | lp         | -301.0   |
| pw                  | 7.650          | PLOT       |          |
| DECOUPLER           |                | wc         | 250      |
| dn                  | H1             | sc         | 0        |
| dof                 | 0              | vs         | 20000    |
| dm                  | yyy            | th         | 8        |
| dmm                 | w              | at         | cdc ph   |
| dpwr                | 39             |            |          |
| dmf                 | 12200          |            |          |

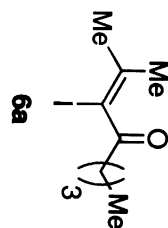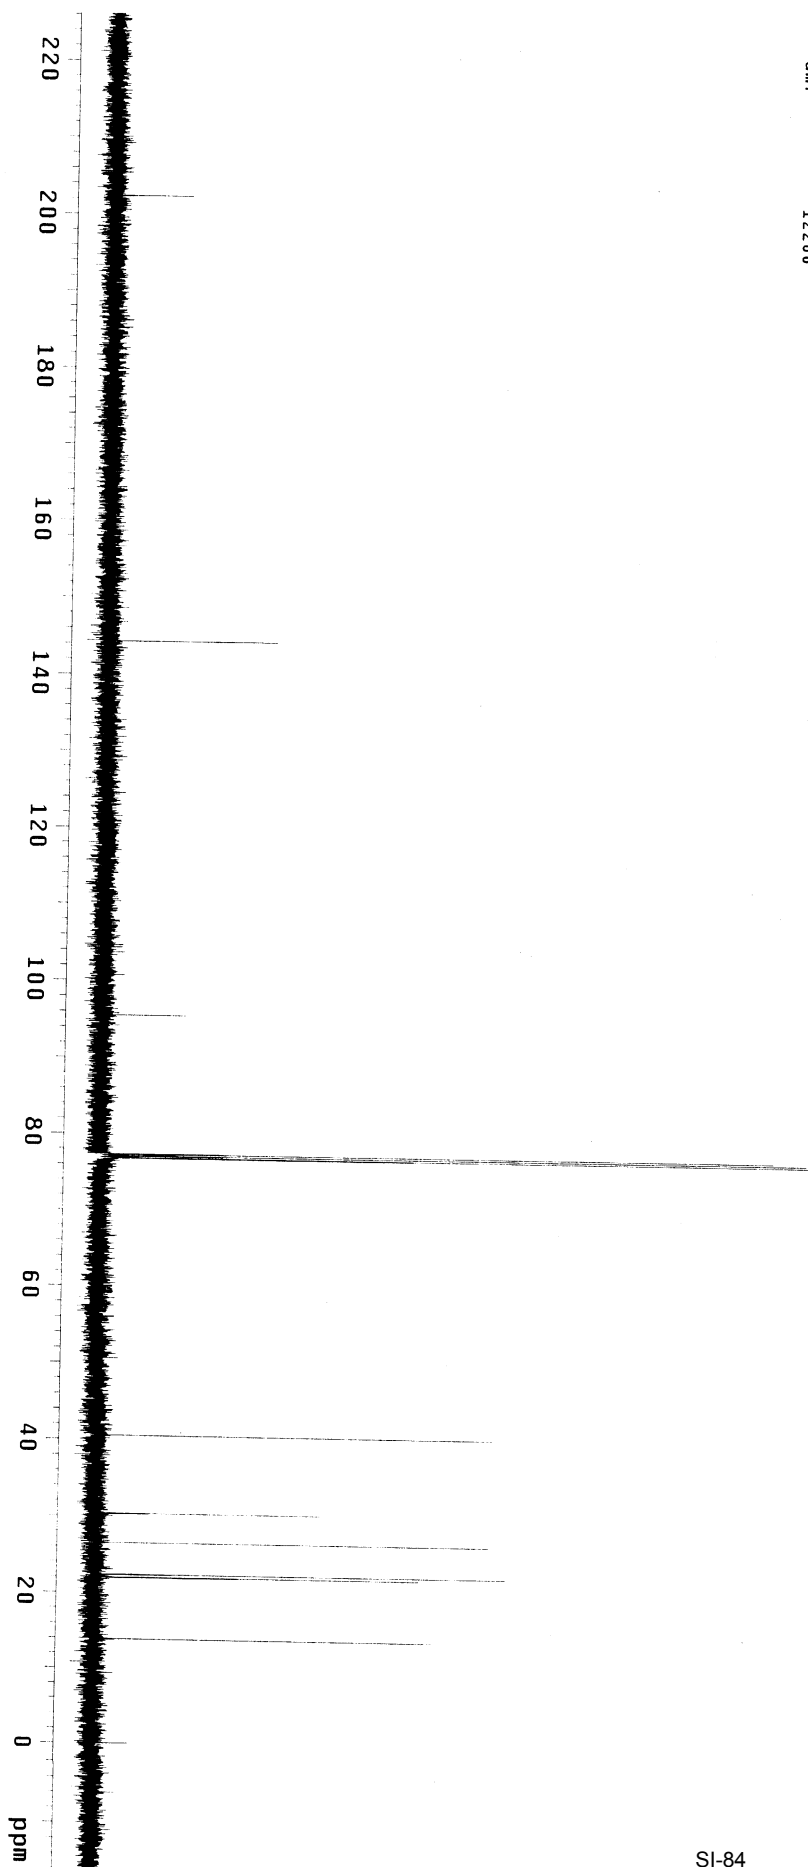

STANDARD 1H OBSERVE - profile

exp4 Proton

| SAMPLE      |                     | SPECIAL    |          |
|-------------|---------------------|------------|----------|
| date        | Jan 9 2007          | temp       | 25.0     |
| solvent     | cdc13               | gain       | not used |
| file        | /home/walrup/~      | spin       | not used |
| nmrsvs      | /data/autot~        | hst        | 0.008    |
|             | 2007.01.09/S_20070~ | pw90       | 13.900   |
|             | 109_001/data/cdc13~ | alpha      | 6.600    |
| ACQUISITION |                     | FLAGS      |          |
| sw          | 6410.3              | in         | n        |
| at          | 2.049               | dp         | y        |
| np          | 26264               | hs         | nm       |
| fb          | 4000                | PROCESSING | 0.20     |
| bs          | 32                  | lb         | 65536    |
| ss          | 2                   | fn         |          |
| dl          | 1.000               | DISPLAY    |          |
| nt          | 8                   | sp         | -393.2   |
| ct          | 8                   | wd         | 3583.9   |
| TRANSMITTER |                     | rfl        | 805.4    |
| tn          | H1                  | rfd        | 0        |
| sfrq        | 399.782             | rfp        | -71.8    |
| tof         | 399.5               | lp         | -44.4    |
| tpwr        | 59                  | PLOT       | 250      |
| pw          | 6.950               | WC         | 0        |
| DECOUPLER   |                     | SC         | 280      |
| dn          | C13                 | VS         | 3        |
| dof         | 0                   | th         |          |
| dm          | nmn                 | ai         | cdc      |
| dmm         | C                   | ph         |          |
| dpwr        | 34                  |            |          |
| dmf         | 29412               |            |          |

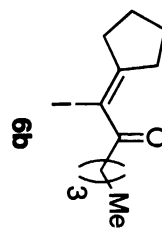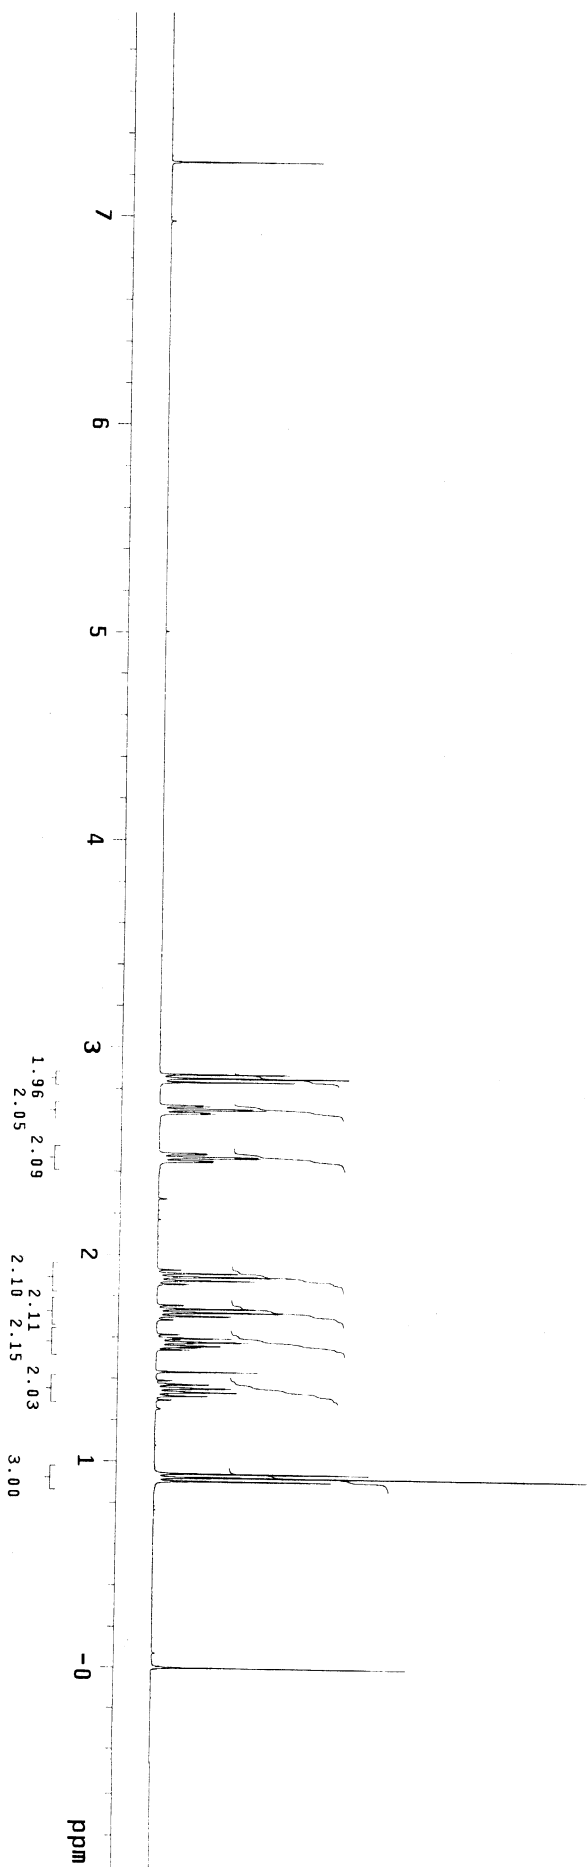

## STANDARD 1H OBSERVE - profile

expt Carbon

| SAMPLE      |                 |          |          | SPECIAL |  |  |  |
|-------------|-----------------|----------|----------|---------|--|--|--|
| date        | Jan 9 2007      | temp     | 25.0     |         |  |  |  |
| solvent     | cdcl3           | gain     | 30       |         |  |  |  |
| file        | /home/walkup/~  | not used |          |         |  |  |  |
| data        | /Zhang/Weng/C5~ | hst      | 0.008    |         |  |  |  |
| ring_NIS    | Acetone-p       | pw90     | 15.300   |         |  |  |  |
| ue_C13      | ftd             | atfa     | 10.000   |         |  |  |  |
| ACQUISITION |                 |          |          | FLAGS   |  |  |  |
| sw          | 30487.8         | i1       | n        |         |  |  |  |
| at          | 1.300           | in       | n        |         |  |  |  |
| np          | 79298           | dp       | y        |         |  |  |  |
| fb          | 17000           | hs       | nn       |         |  |  |  |
| bs          | 32              |          |          |         |  |  |  |
| d1          | 1.000           | lb       | 0.50     |         |  |  |  |
| nt          | 2560            | fn       | not used |         |  |  |  |
| ct          | 704             |          |          |         |  |  |  |
| TRANSMITTER |                 |          |          | DISPLAY |  |  |  |
| tn          | C13             | sp       | -2075.4  |         |  |  |  |
| strq        | 125.689         | wp       | 30487.3  |         |  |  |  |
| tof         | 1255.3          | rfl      | 11753.9  |         |  |  |  |
| tpwr        | 49              | rfd      | 9678.1   |         |  |  |  |
| pw          | 7.650           | lp       | -114.2   |         |  |  |  |
| DECOUPLER   |                 |          |          | PLOT    |  |  |  |
| dn          | H1              | wc       | 250      |         |  |  |  |
| dof         | 0               | sc       | 0        |         |  |  |  |
| dm          | yyy             | vs       | 70000    |         |  |  |  |
| dmm         | w               | th       | 17       |         |  |  |  |
| dpwr        | 39              | ai       |          |         |  |  |  |
| dmf         | 12200           | cdc      | ph       |         |  |  |  |

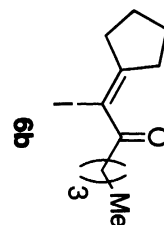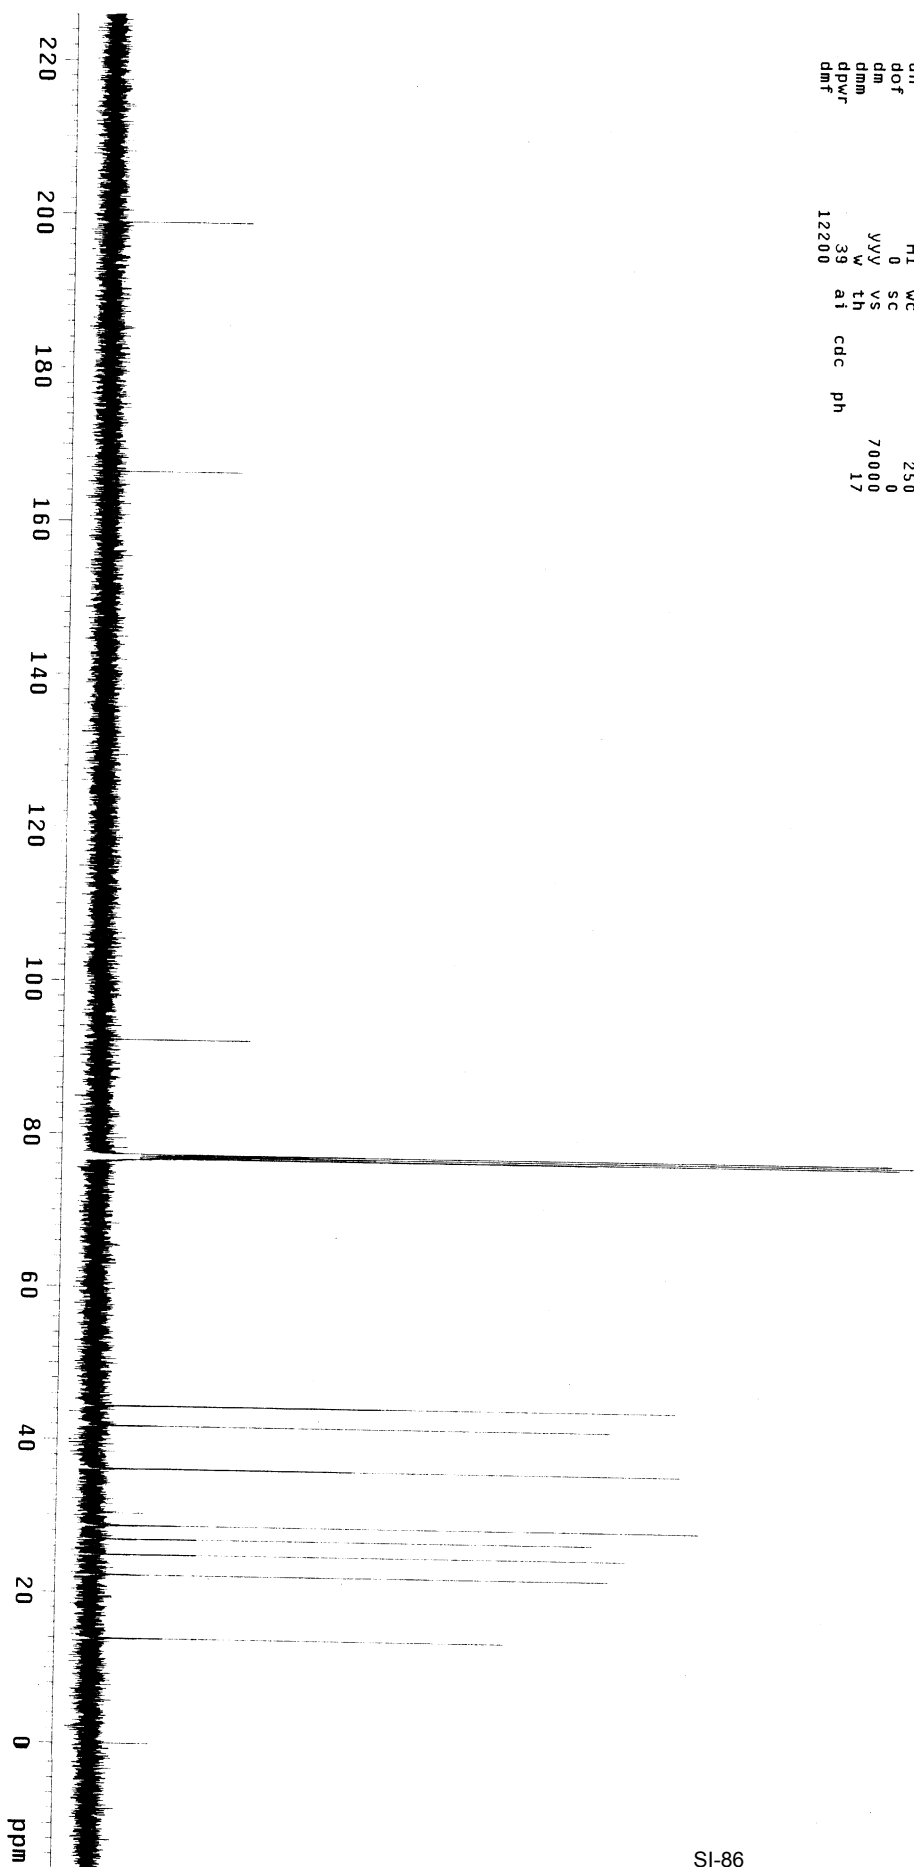

STANDARD 1H OBSERVE - profile

exp2 Proton

|                |                 |            |          |
|----------------|-----------------|------------|----------|
| SAMPLE         |                 | SPECIAL    |          |
| date           | Jan 3 2007      | temp       | 25.0     |
| solvent        | cdcl3           | gain       | not used |
| file           | /home/walakup/~ | spin       | not used |
| nmrsvs/data/   | auto~           | hst        | 0.008    |
| 2007.01.03.11/ | s-20~           | pw90       | 13.900   |
| 070103_001/    | data/cd~        | alfa       | 6.600    |
| c13            | 01.fid          | FLAGS      |          |
| ACQUISITION    |                 |            |          |
| sw             | 6410.3          | in         | n        |
| at             | 2.049           | dp         | y        |
| np             | 26264           | hs         | nn       |
| fb             | 4000            | PROCESSING |          |
| ss             | 32              | lb         | 0.20     |
| dl             | 1.000           | fn         | 65536    |
| nt             | 8               | sp         | -397.3   |
| ct             | 8               | wp         | 3594.0   |
| TRANSMITTER    |                 | rf1        | 805.0    |
| tn             | H1              | rfp        | 0        |
| stfq           | 399.782         | fp         | -39.4    |
| tof            | 399.5           | lp         | -46.8    |
| tpwr           | 59              | PLOT       |          |
| pw             | 6.950           | wc         | 250      |
| DECOUPLER      |                 | sc         | 0        |
| dn             | C13             | vs         | 300      |
| dof            | 0               | th         | 2        |
| dm             | nmn             | at         | cdc      |
| dmm            | c               | ph         |          |
| dpwr           | 34              |            |          |
| dmf            | 29412           |            |          |

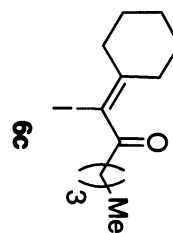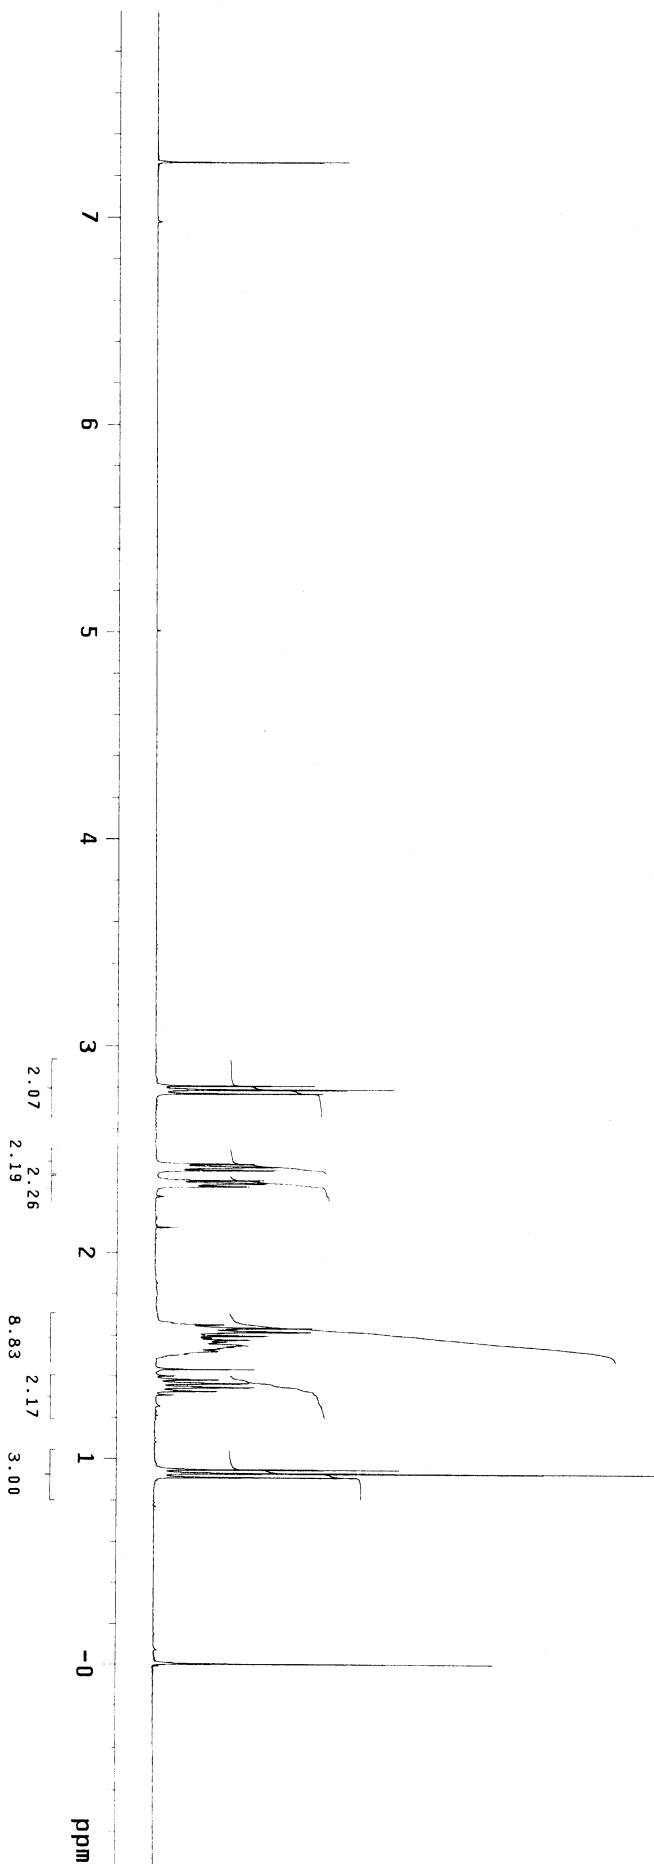

## STANDARD 1H OBSERVE - profile

expt Carbon

SAMPLE SPECIAL  
 date Jan 10 2007 temp 25.0  
 solvent cdc13 gain 30  
 file /home/walkup/~ not used  
 vnmf sys/data/auto\_~ hst 0.008  
 2007.01.10\_01/Aug.~ pw90 15.300  
 03/data/cdc13\_01.f~ alfa 10.000  
 id

ACQUISITION  
 sw 30487.8 il n  
 at 1.300 in y  
 np 79298 hs nn  
 fb 17000  
 bs 64 lb 0.50  
 dl 1.000 fn not used  
 nt 256  
 ct 64

TRANSMITTER  
 tn C13 sp -2077.7  
 sfrq 125.689 rfi 30487.3  
 tof 1255.3 rfp 11756.2  
 tpwr 49 tp -124.6  
 pw 7.650 -259.1

DECOUPLER  
 dn WC  
 dof H1 250  
 dm 0  
 dmm VS 7000  
 dpwr th 7  
 dmf w ai cdc ph

12200

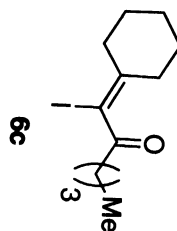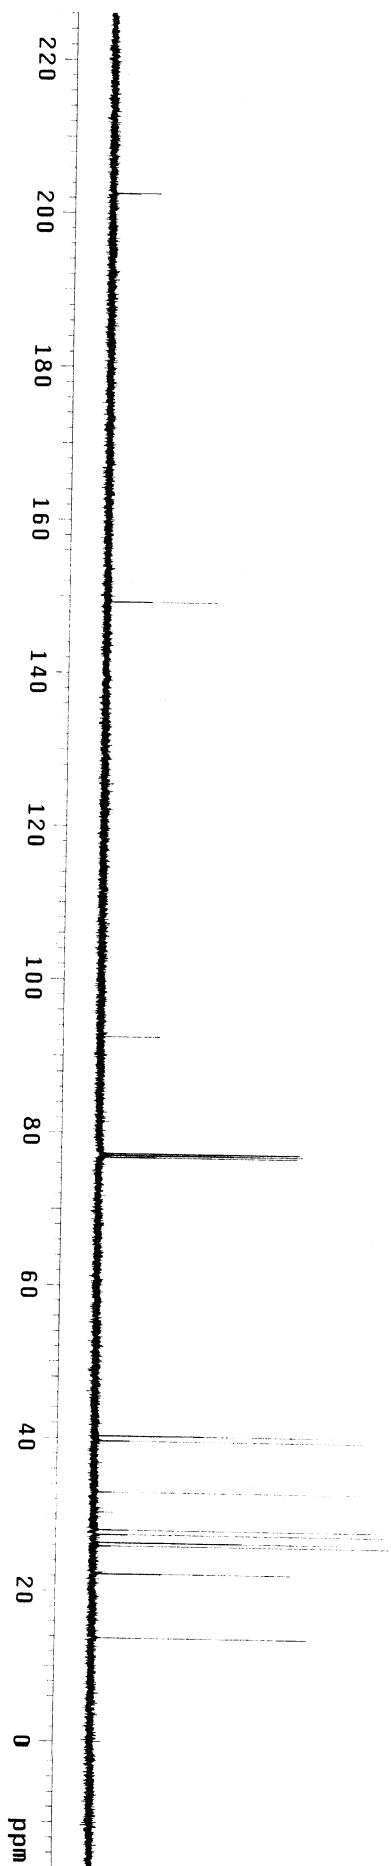



STANDARD 1H OBSERVE - profile  
STANDARD 1H OBSERVE - profile  
STANDARD 1H OBSERVE - profile

exp2 Proton

SAMPLE SPECIAL  
date Jan 5 2007 temp 25.0  
solvent cdcl3 gain not used  
file /home/walkup/~ spin not used  
vnmrsvs/data/auto ~ hst 0.008  
2007.01.05.09/s-20~ pw90 13.900  
070105\_003/data/cd~ a1fa 6.600  
C13 01.fid  
ACQUISITION  
sw 6410.3 in n  
at 2.049 dp y  
np 26264 hs nn  
fb 4000  
bs 32 lb  
ss 2 fn  
di 1.000 DISPLAY 65536  
nt 8 SP -405.5  
ct 8 WP 3586.6  
TRANSMITTER H1 rfp 805.8  
in 399.782 rfp 0  
sfreq 399.5 lp -46.4  
tof 399.5 1p -33.1  
tpwr 59  
pw 6.950 WC 250  
DECOUPLER C13 VS 0  
dn 0 tn ai cdc ph 500  
dof 0  
dm nnh  
dmm c  
dpwr 34  
dmf 29412

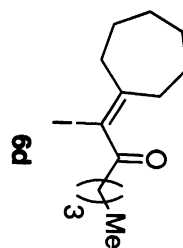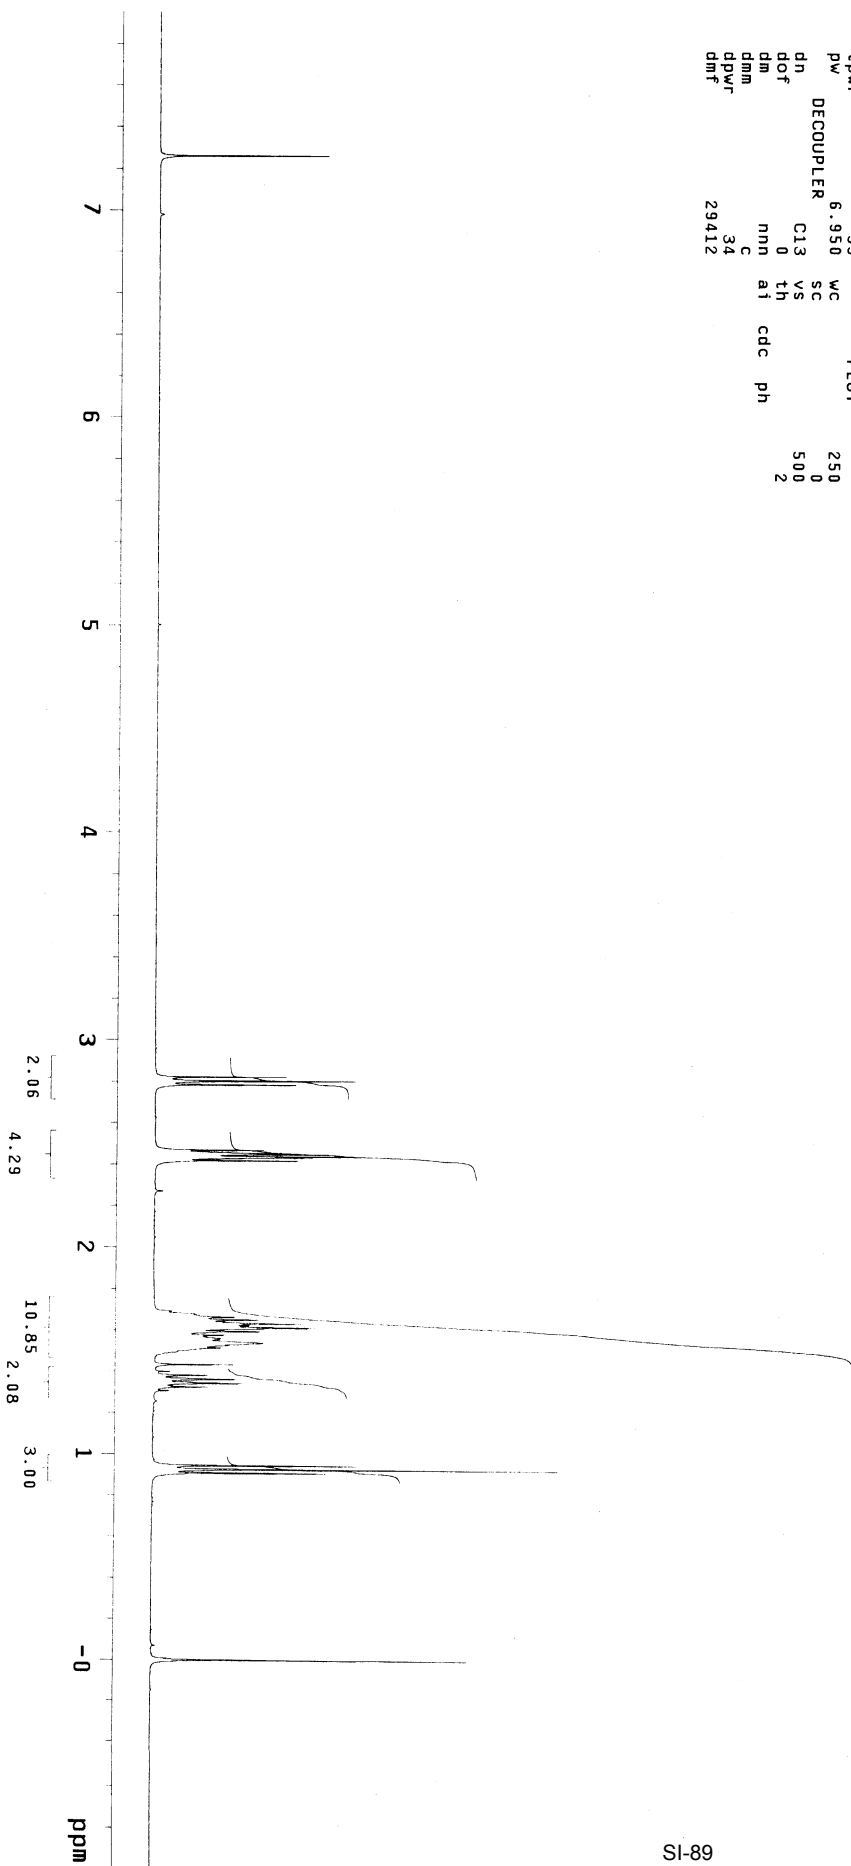

## STANDARD 1H OBSERVE - profile

expt Carbon

| SAMPLE              |                | SPECIAL |          |
|---------------------|----------------|---------|----------|
| date                | Jan 9 2007     | temp    | 25.0     |
| solvent             | cdcl3          | gain    | 30       |
| file                | /home/walkup/~ | spin    | not used |
| nmr                 | sys/data/aut/~ | hst     | 0.008    |
| 2007.01.09/Aug.01/~ | pw90           | 15.300  |          |
| data/cdcl3_01.fid   | alfa           | 10.000  |          |
| ACQUISITION         |                | FLAGS   |          |
| sw                  | 30487.8        | i1      | n        |
| at                  | 1.300          | in      | n        |
| np                  | 79298          | dp      | y        |
| fb                  | 17000          | hs      | nn       |
| bs                  | 64             |         |          |
| d1                  | 1.000          | lb      | 0.50     |
| nt                  | 256            | fn      | not used |
| ct                  | 256            |         |          |
| TRANSMITTER         |                | DISPLAY |          |
| tn                  | C13            | sp      | -2075.8  |
| sfrq                | 125.689        | wp      | 30487.3  |
| tof                 | 1255.3         | rfl     | 11754.4  |
| tpwr                | 49             | rfp     | 9678.1   |
| pw                  | 7.650          | fp      | 141.7    |
| DECOUPLER           |                | lp      | -232.2   |
| dn                  | H1             |         |          |
| dof                 | 0              | WC      | 250      |
| dm                  | 0              | SC      | 0        |
| dmm                 | YVY            | VS      | 23000    |
| dpmr                | W              | th      | 7        |
| dmf                 | 39             | ai      |          |
|                     | 12200          | cdc     | ph       |

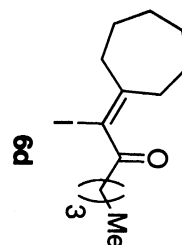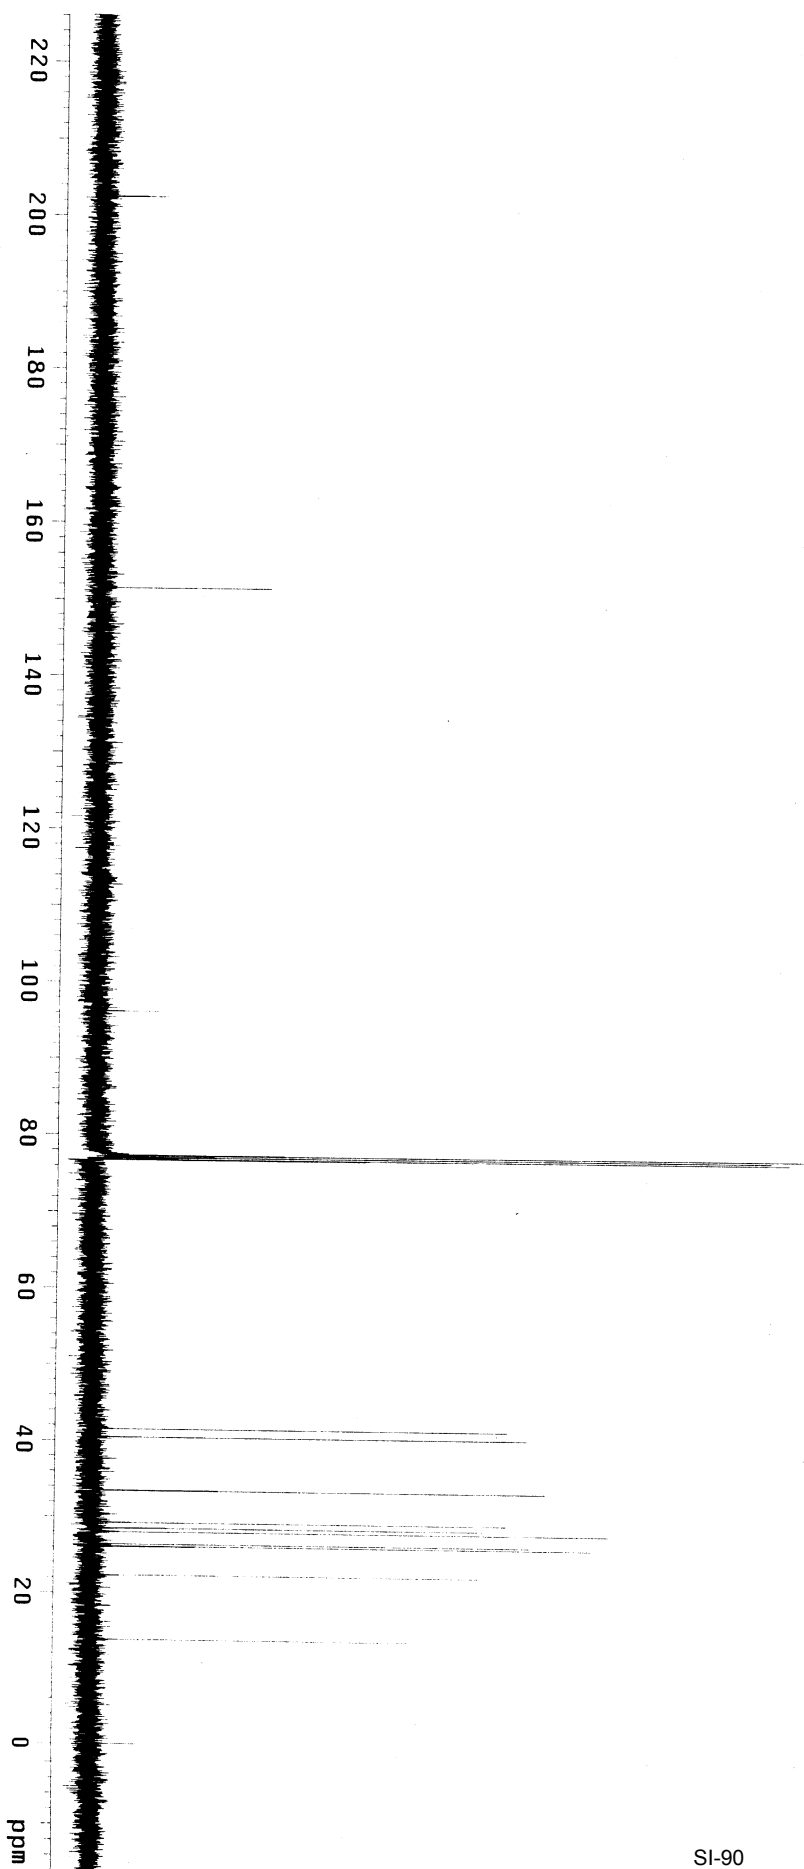

STANDARD 1H OBSERVE - profile

expt Proton

| SAMPLE              |                 | SPECIAL |          |
|---------------------|-----------------|---------|----------|
| date                | Jan 9 2007      | temp    | 25.0     |
| solvent             | cdc13           | gain    | not used |
| file                | /home/walkup/~  | spin    | not used |
| vmr                 | sys/data/auto_~ | hst     | 0.008    |
| 2007.01.09_04/AUG.~ |                 | pw90    | 14.700   |
| 01/data/cdc13_01.f~ |                 | alfa    | 6.600    |

  

| ACQUISITION |         | FLAGS |        |
|-------------|---------|-------|--------|
| sw          | 8012.8  | in    | n      |
| at          | 2.049   | dp    | y      |
| np          | 32830   | hs    | nn     |
| fb          | 4000    |       |        |
| bs          | 32      | lb    | 0.20   |
| ss          | 2       | fn    | 65536  |
| dl          | 1.000   |       |        |
| nt          | 8       | sp    | -509.6 |
| ct          | 8       | wd    | 4499.4 |
| tn          | 8       | rfl   | 1007.5 |
| sfreq       | 499.809 | rfp   | 0      |
| tof         | 499.7   | tp    | -159.8 |
| tpwr        | 54      | ip    | -32.4  |
| pw          | 7.350   | wc    | 250    |

  

| DECOUPLER |       | PLOT |     |
|-----------|-------|------|-----|
| dn        | C13   | sc   | 0   |
| dof       | 0     | th   | 80  |
| dm        | nnn   | ai   | cdc |
| dmm       |       | ph   |     |
| dpwr      | 34    |      |     |
| dnt       | 32258 |      |     |

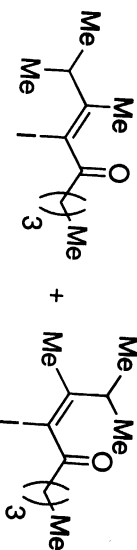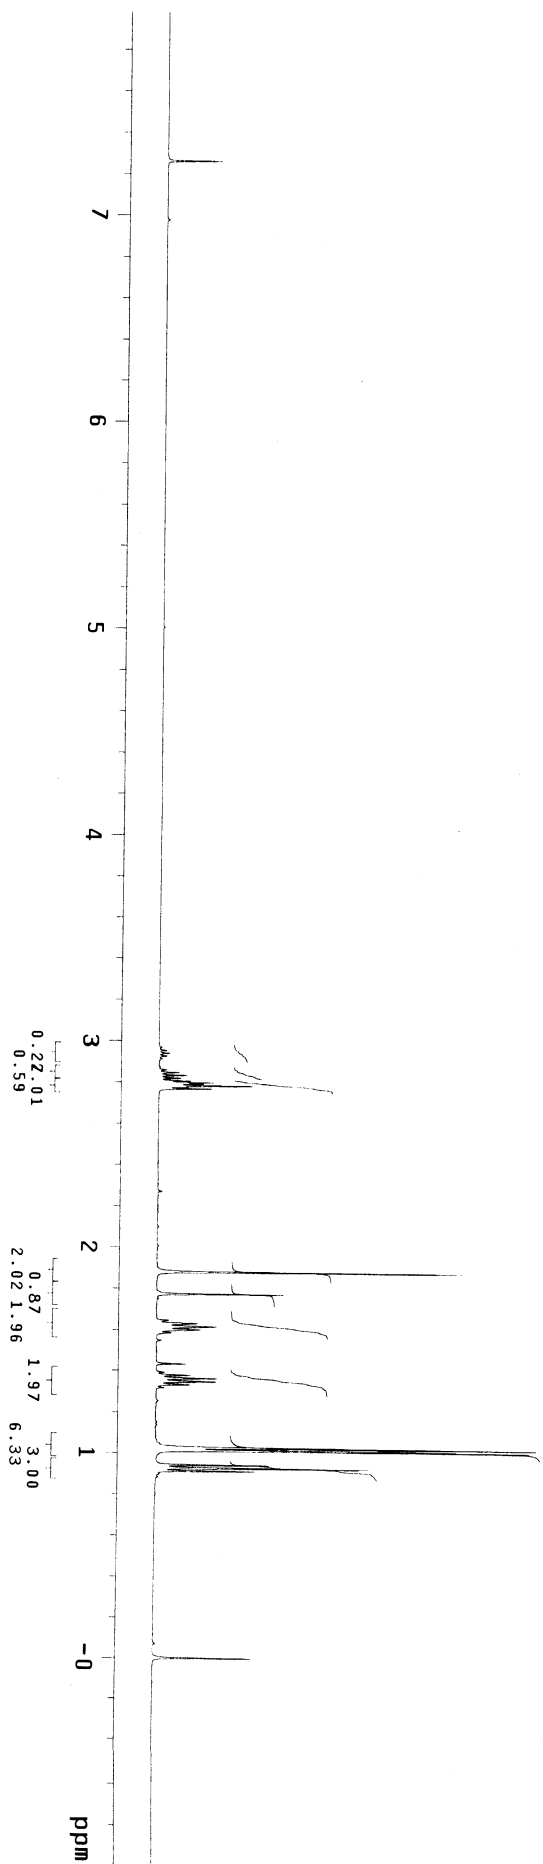

STANDARD 1H OBSERVE - profile  
STANDARD 1H OBSERVE - profile

expt Carbon

SAMPLE SPECIAL 25.0  
date Jan 9 2007 temp  
solvent cdc13 gain 30  
file /home/walkup/~ not used  
vmr/sys/data/auto\_~ hst 0.008  
2007.01.09.06/Aug.~ pw90 15.300  
03/data/cdc13\_01.f~ alfa 10.000

ACQUISITION id f1 FLAGS  
sw 30487.8 in n  
at 1.300 dp y  
np 79298 hs  
tb 17000  
bs 32 lb  
d1 1.000 fn  
nt 500 not used  
ct 256 DISPLAY  
tn TRANSMITTER C13 SP -2075.8  
sfreq 125.689 rf1 11734.4  
tof 1255.3 rfp 9678.1  
tpwr 49 tp -126.6  
pw 7.650 PLOT -259.6  
DECOUPLER WC 250  
dn H1 SC 0  
dof 0  
dm yy th 40000  
dmm w at  
dpwr 39 cdc ph 4  
dmf 12200

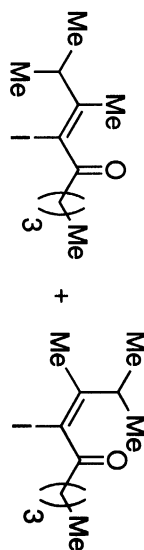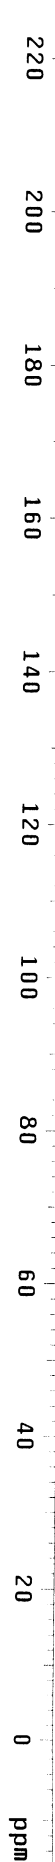

expt1 Proton

| SAMPLE              |               | SPECIAL |          |
|---------------------|---------------|---------|----------|
| date                | Jan 18 2007   | temp    | 25.0     |
| solvent             | cdcl3         | gain    | 30       |
| file                | /home/vmr1/n~ | spin    | not used |
| mr500               | waikup/data/~ | hst     | 0.008    |
| Zhang/Guozhu/H1-20~ |               | pw90    | 14.700   |
| 070118-60.fid       |               | alfa    | 6.600    |
| ACQUISITION         |               | FLAGS   |          |
| sw                  | 8012.8        | i1      | n        |
| at                  | 2.049         | in      | n        |
| np                  | 32830         | dp      | y        |
| fb                  | 4000          | hs      | nn       |
| bs                  | 8             |         |          |
| d1                  | 1.000         | lb      | 0.20     |
| nt                  | 1             | fn      | 65536    |
| ct                  | 1             |         |          |
| TRANSMITTER         |               | DISPLAY |          |
| tn                  | H1            | sp      | -751.4   |
| sfrq                | 499.809       | wd      | 5703.2   |
| tof                 | 499.7         | rfl     | 1004.0   |
| tpwr                | 54            | rfp     | 0        |
| pwr                 | 7.350         | tp      | -170.4   |
| DECOUPLER           |               | PLOT    |          |
| dn                  | C13           | wc      | 250      |
| dof                 | 0             | sc      | 0        |
| dm                  | nn            | vs      | 185      |
| dmm                 | c             | th      | 2        |
| dpwr                | 34            | ai      | cdc      |
| dmf                 | 32258         | ph      |          |

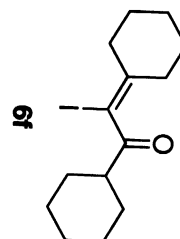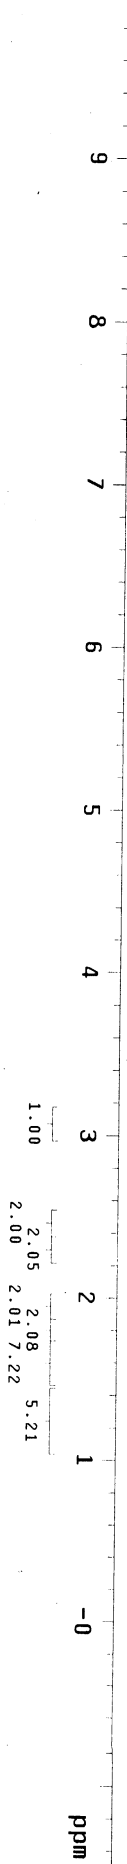

expt Carbon

SAMPLE SPECIAL  
date Jan 18 2007 temp 25.0  
solvent cdc13 gain 30  
file /home/vmr1/n~ spin not used  
mr500/waikup/data/~ hst 0.008  
Zhang/Guozhu/C13-2~ pw90 15.300  
0070118-61.fid alfa 10.000  
ACQUISITION  
sw 30487.8 f1 n  
at 1.300 in n  
np 79298 dp y  
fb 17000 hs nn  
bs 64  
d1 1.000 lb  
nt 1280 fn not used  
ct 320  
TRANSMITTER SP DISPLAY  
tn C13 wd -2077.8  
sfrq 125.689 rf1 30487.3  
tof 1255.3 rfp 11755.3  
tpwr 49 9677.1  
pw 7.650 tp -102.1  
DECOUPLER PLOT  
dn H1 WC 250  
dof 0 SC 0  
dm 0 VS 12965  
dmm VVV w th 6  
dpwr 39 ai cdc ph  
dmf 12200

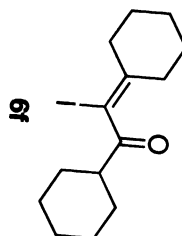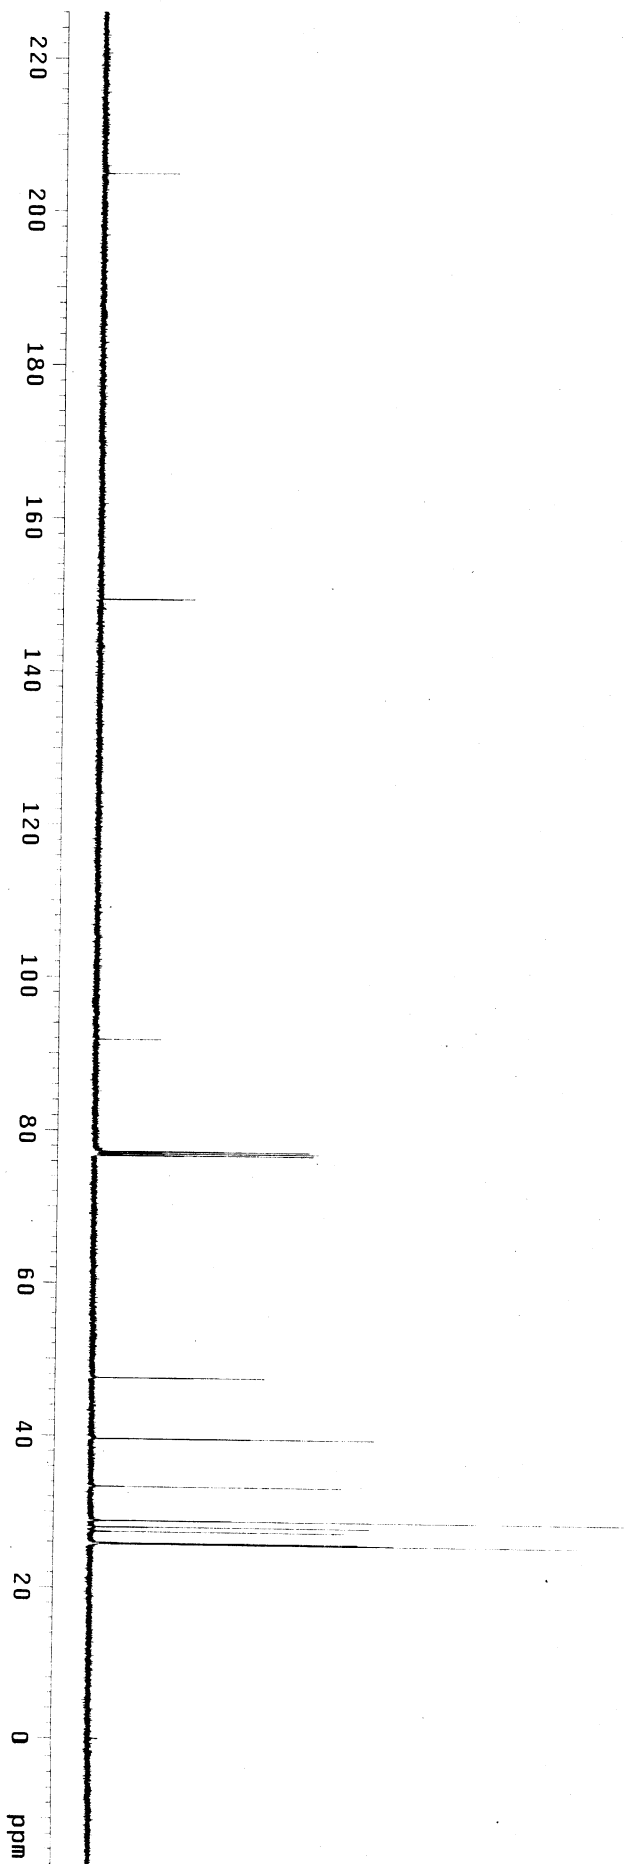

expt1 Proton

| SAMPLE              |                | SPECIAL |          |
|---------------------|----------------|---------|----------|
| date                | Jan 18 2007    | temp    | 25.0     |
| solvent             | cdcl3          | gain    | 30       |
| file                | /home/vnmr1/n~ | spin    | not used |
| mr400               | wal kup/data/~ | hst     | 0.008    |
| Zhang/Guozhu/H1-20~ |                | pw90    | 13.900   |
| 070117-56.fid       | alfa           |         | 6.600    |
| ACQUISITION         |                | FLAGS   |          |
| sw                  | 6410.3         | i1      | n        |
| at                  | 2.049          | in      | n        |
| np                  | 26264          | dp      | y        |
| fb                  | 4000           | hs      | nn       |
| bs                  | 8              |         |          |
| dl                  | 1.000          | lb      | 0.20     |
| nt                  | 1              | fn      | 65536    |
| ct                  | 1              |         |          |
| TRANSMITTER         |                | DISPLAY |          |
| tn                  | H1             | sp      | -492.2   |
| sfrq                | 399.782        | wd      | 4653.5   |
| tof                 | 399.5          | rfl     | 805.2    |
| tpwr                | 53             | rtp     | 139.3    |
| pw                  | 6.950          | tp      | -23.1    |
| DECOUPLER           |                | PLOT    |          |
| dn                  | C13            | wc      | 250      |
| dof                 | 0              | sc      | 0        |
| dm                  | nnn            | vs      | 2720     |
| dmm                 | c              | th      | 3        |
| dpwr                | 34             | ai      | cdc      |
| dmf                 | 29412          | ph      |          |

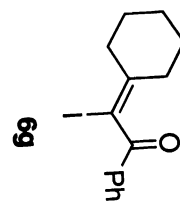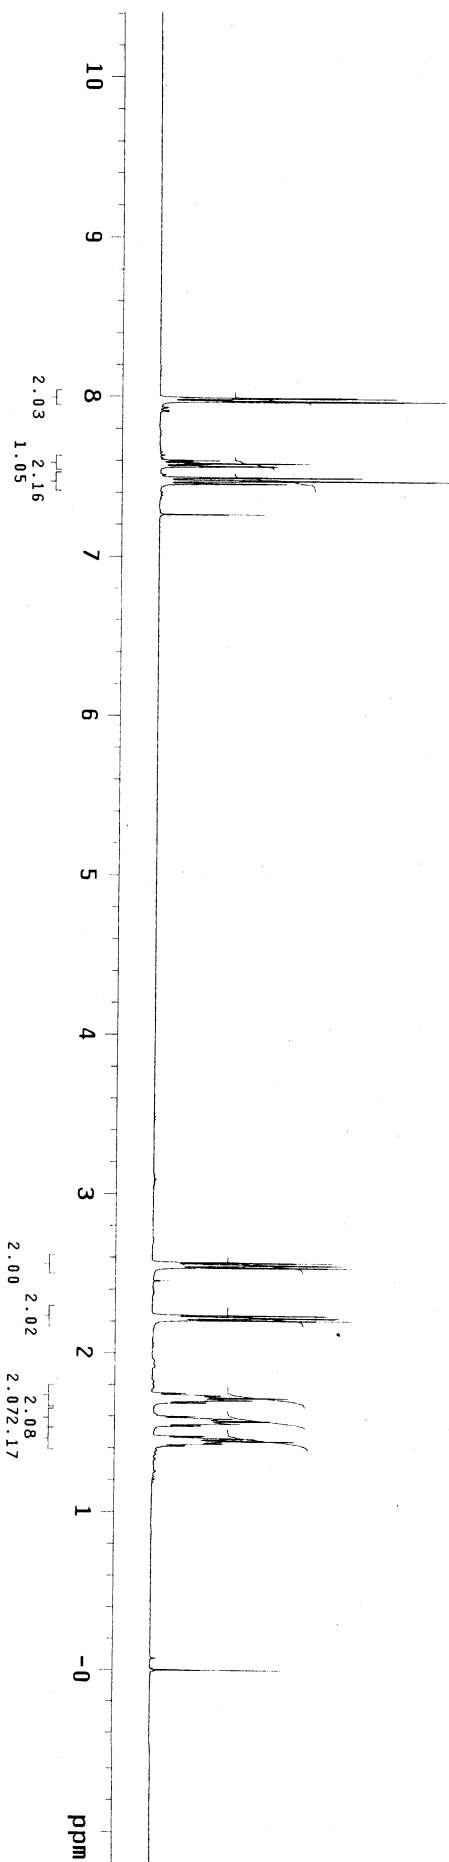

expt Carbon

SAMPLE SPECIAL  
date Jan 18 2007 temp 25.0  
solvent cdc13 gain 30  
file /home/vmr1/n~ spin not used  
m:500/walkup/data/~ hst 0.008  
Zhang/Guozhu/C13-2~ pw90 15.300  
0070118-58.fid alfa 10.000  
ACQUISITION  
sw 30487.8 f1  
at 1.300 in n  
np 79298 dp y  
fb 17000 hs nn  
bs 64  
dl 1.000 lb  
nt 1280 fn not used  
ct 768  
TRANSMITTER  
tn C13 sp -2081.0  
sfreq 125.689 wf 30487.3  
tof 1255.3 rfp 11758.6  
tpwr 49 rfp 9677.1  
pw 7.650 tp -101.7  
DECOUPLER PLOT -263.1  
dn H1 wc 250  
dof 0 sc 0  
dm 0 vs 0  
dmm YVW 9090  
dpwr 39 ai  
dmf 12200 cdc ph 2

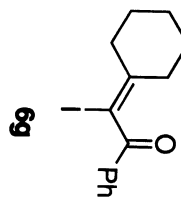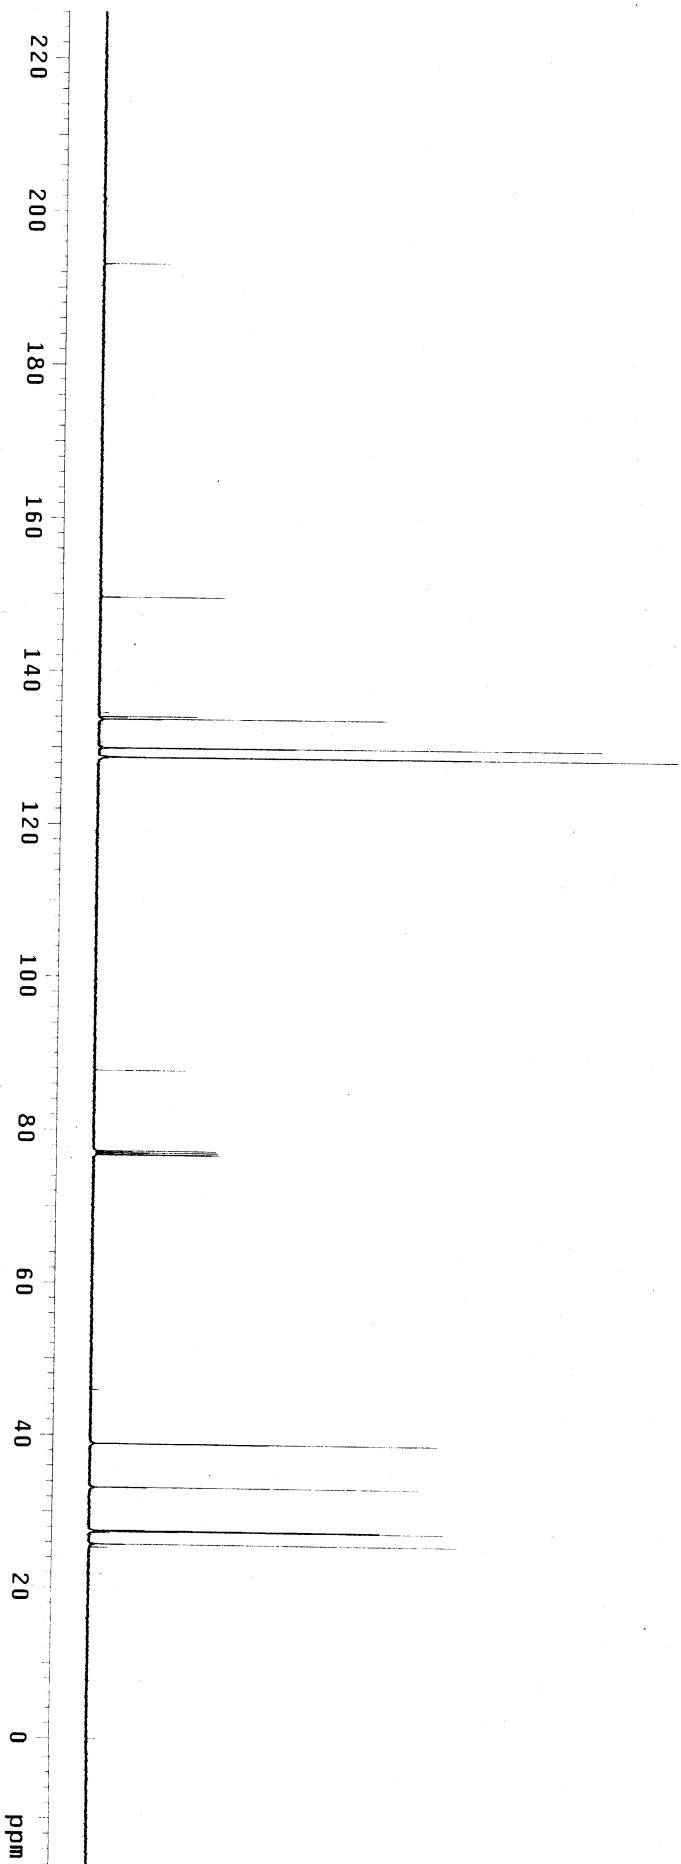

Supplement: Supplementary file 1 [file 4706851]
